# Supplementary material for: Metal-free nitro/azido cyclization of 1-acryloyl-2-cyanoindoles to access NO2/N3-featuring pyrrolo[1,2-a] indolediones
Source: Royal Society of Chemistry journal article supplement (doi:10.1039/d4ob01001a), 2024-01-01

## Supporting Information

### Metal-free nitro/azido cyclization of 1-acryloyl-2-cyanoindoles to access NO<sub>2</sub>/N<sub>3</sub>-featured pyrrolo[1,2-a] indolediones

Huaqing Liu, Qinqin Yan,\* Yanzhao Zeng, Xinyi Hou, Ying Wang, Lijun Li,\* and Zejiang Li\*

State Key Laboratory of New Pharmaceutical Preparations and Excipients, Key Laboratory of Medicinal Chemistry and Molecular Diagnosis of the Ministry of Education, Key Laboratory of Chemical Biology of Hebei Province, College of Chemistry and Materials Science, Hebei Research Center of the Basic Discipline of Synthetic Chemistry, Hebei University, Baoding, Hebei, 071002, P. R. China. E-mail: lizejiang898@126.com, llj@hbu.edu.cn, yanqin\_9397@126.com.

|                                                                                 |    |
|---------------------------------------------------------------------------------|----|
| General Information.....                                                        | 2  |
| Typical procedure for the reaction.....                                         | 2  |
| Reaction condition optimization.....                                            | 2  |
| Mechanistic studies.....                                                        | 4  |
| Crystallographic details.....                                                   | 7  |
| Physical data for the following products.....                                   | 9  |
| Copies of the <sup>1</sup> H NMR, <sup>13</sup> C NMR, <sup>19</sup> F NMR..... | 23 |

## General Information

$^1\text{H}$  and  $^{13}\text{C}$  NMR and  $^{19}\text{F}$  NMR spectra were recorded on a Bruker advance III 400 or 600 spectrometer in  $\text{CDCl}_3$  with TMS as the internal standard. High-resolution mass spectral analysis (HRMS) data were measured on a Waters Xevo G2-XS qTOF. All products were identified by  $^1\text{H}$  and  $^{13}\text{C}$  NMR, HRMS. The raw materials were purchased from Energy, Meryer, J&K Chemicals, or Aldrich and used without further purification.

## Typical procedure for the reaction

Reaction conditions 1: A mixture of 1-acryloyl-2-cyanoindoles (1 equiv., 0.1 mmol), TBN (3 equiv., 0.3 mmol), EA (3 mL), and  $\text{H}_2\text{O}$  (0.5 mL) was added into a 15 mL sealed pipe, which was conducted at  $100\text{ }^\circ\text{C}$  in a heating mantle with an air atmosphere. After the nitro cyclization process was finished in 12 hours, the mixture was condensed under vacuum and purified by column chromatography to afford the corresponding nitro products.

Reaction conditions 2: A mixture of 1-acryloyl-2-cyanoindoles (1 equiv., 0.1 mmol),  $\text{TMSN}_3$  (2 equiv., 0.2 mmol), PIFA (4 equiv., 0.4 mmol), dichloromethane (DCM, 2 mL), and  $\text{H}_2\text{O}$  (1 mL) was added into a 15 mL sealed pipe, which was conducted at  $30\text{ }^\circ\text{C}$  in an oil bath with an air atmosphere. After the transformation was completed in 12 hours, a similar workup was operated.

Table S1 Reaction condition optimization<sup>a</sup>

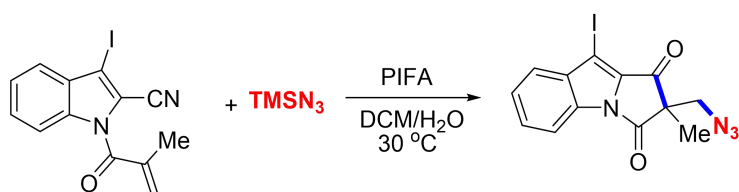

| Entry | N <sub>3</sub> source (equiv.) | Oxidant (equiv.) | Solvent (mL)                      | Temp. (°C) | Time (h) | Yield <sup>b</sup> (%) |
|-------|--------------------------------|------------------|-----------------------------------|------------|----------|------------------------|
| 1     | $\text{TMSN}_3$ (2)            | PIFA (2)         | DCM: $\text{H}_2\text{O}$ (2:0.5) | 30         | 12       | 45                     |
| 2     | $\text{TMSN}_3$ (2.5)          | PIFA (2)         | DCM: $\text{H}_2\text{O}$         | 30         | 12       | 45                     |

|           |                             |                                   |                                               |           |           |           |
|-----------|-----------------------------|-----------------------------------|-----------------------------------------------|-----------|-----------|-----------|
|           |                             |                                   | (2:0.5)                                       |           |           |           |
| 3         | TMSN <sub>3</sub> (3)       | PIFA (2)                          | DCM: H <sub>2</sub> O<br>(2:0.5)              | 30        | 12        | 47        |
| 4         | NaN <sub>3</sub> (2)        | PIFA (2)                          | DCM: H <sub>2</sub> O<br>(2:0.5)              | 30        | 12        | 37        |
| 5         | TMSN <sub>3</sub> (2)       | PIFA (2)                          | DCM: H <sub>2</sub> O<br>(2:0.5)              | 50        | 12        | 40        |
| 6         | TMSN <sub>3</sub> (2)       | PIFA (2)                          | DCM: H <sub>2</sub> O<br>(2:0.5)              | 80        | 12        | 34        |
| 7         | TMSN <sub>3</sub> (2)       | DIB (2)                           | DCM: H <sub>2</sub> O<br>(2:0.5)              | 30        | 12        | NR        |
| 8         | TMSN <sub>3</sub> (2)       | I <sub>2</sub> O <sub>5</sub> (2) | DCM: H <sub>2</sub> O<br>(2:0.5)              | 30        | 12        | NR        |
| 9         | TMSN <sub>3</sub> (2)       | PIFA (3)                          | DCM: H <sub>2</sub> O<br>(2:0.5)              | 30        | 12        | 50        |
| 10        | TMSN <sub>3</sub> (2)       | PIFA (4)                          | DCM: H <sub>2</sub> O<br>(2:0.5)              | 30        | 12        | 56        |
| 11        | TMSN <sub>3</sub> (2)       | PIFA (4)                          | DCM: H <sub>2</sub> O<br>(1:0.5)              | 30        | 12        | 51        |
| 12        | TMSN <sub>3</sub> (2)       | PIFA (4)                          | DCM: H <sub>2</sub> O<br>(3:0.5)              | 30        | 12        | 50        |
| 13        | TMSN <sub>3</sub> (2)       | PIFA (4)                          | DCM: H <sub>2</sub> O<br>(2:1.5)              | 30        | 12        | 48        |
| <b>14</b> | <b>TMSN<sub>3</sub> (2)</b> | <b>PIFA (4)</b>                   | <b>DCM: H<sub>2</sub>O</b><br><b>(2:1)</b>    | <b>30</b> | <b>12</b> | <b>61</b> |
| 15        | TMSN <sub>3</sub> (2)       | PIFA (4)                          | DCE: H <sub>2</sub> O<br>(2:1)                | 30        | 12        | 36        |
| 16        | TMSN <sub>3</sub> (2)       | PIFA (4)                          | CH <sub>3</sub> CN:<br>H <sub>2</sub> O (2:1) | 30        | 12        | 46        |

|    |                       |          |                                |    |    |    |
|----|-----------------------|----------|--------------------------------|----|----|----|
| 17 | TMSN <sub>3</sub> (2) | PIFA (4) | DMF: H <sub>2</sub> O<br>(2:1) | 30 | 12 | 27 |
| 18 | TMSN <sub>3</sub> (2) | PIFA (4) | EA: H <sub>2</sub> O<br>(2:1)  | 30 | 12 | 44 |

<sup>a</sup>Reaction conditions: 1-acryloyl-2-cyanoindoles (1 equiv., 0.1 mmol), TMSN<sub>3</sub> (2 equiv.), PIFA (4 equiv.), dichloromethane (DCM, 2 mL), H<sub>2</sub>O (1 mL), 30 °C, air, 12 h. <sup>b</sup>Isolated yields.

The detailed reaction condition optimization of the azide cyclization process was described as shown in Table S1. First, The variation of the azide sources and hypervalent iodines indicated that 2 equiv. TMSN<sub>3</sub>/4 equiv. PIFA was best for this cascade system (entries 1-10). Next, after adjusting the kinds and volume of the co-solvents, we found that 2 mL DCM and 1 mL H<sub>2</sub>O were the optimal co-solvents (entries 11-18). Finally, the optimum reaction system was listed as follows: 1-acryloyl-2-cyanoindoles (1 equiv., 0.1 mmol), TMSN<sub>3</sub> (2 equiv.), PIFA (4 equiv.), dichloromethane (DCM, 2 mL), H<sub>2</sub>O (1 mL), 30 °C, air, 12 h.

### Mechanistic studies

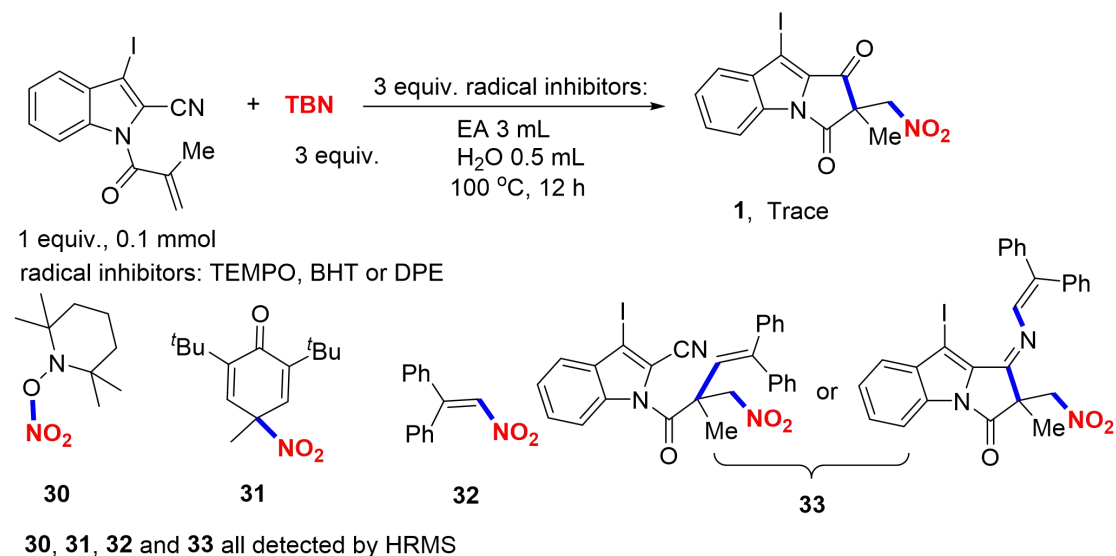

| Sample No. | Formula (M)                                                  | Ion Formula                                                  | Measured m/z | Calc m/z | Diff (ppm) |
|------------|--------------------------------------------------------------|--------------------------------------------------------------|--------------|----------|------------|
| 30         | C <sub>9</sub> H <sub>18</sub> N <sub>2</sub> O <sub>3</sub> | C <sub>9</sub> H <sub>19</sub> N <sub>2</sub> O <sub>3</sub> | 203.1389     | 203.1390 | -0.05      |

1038 #11 RT: 0.14 AV: 1 NL: 5.95E5  
 T: FTMS (1,1) + pAPCI corona Full ms [100.00-1000.00]

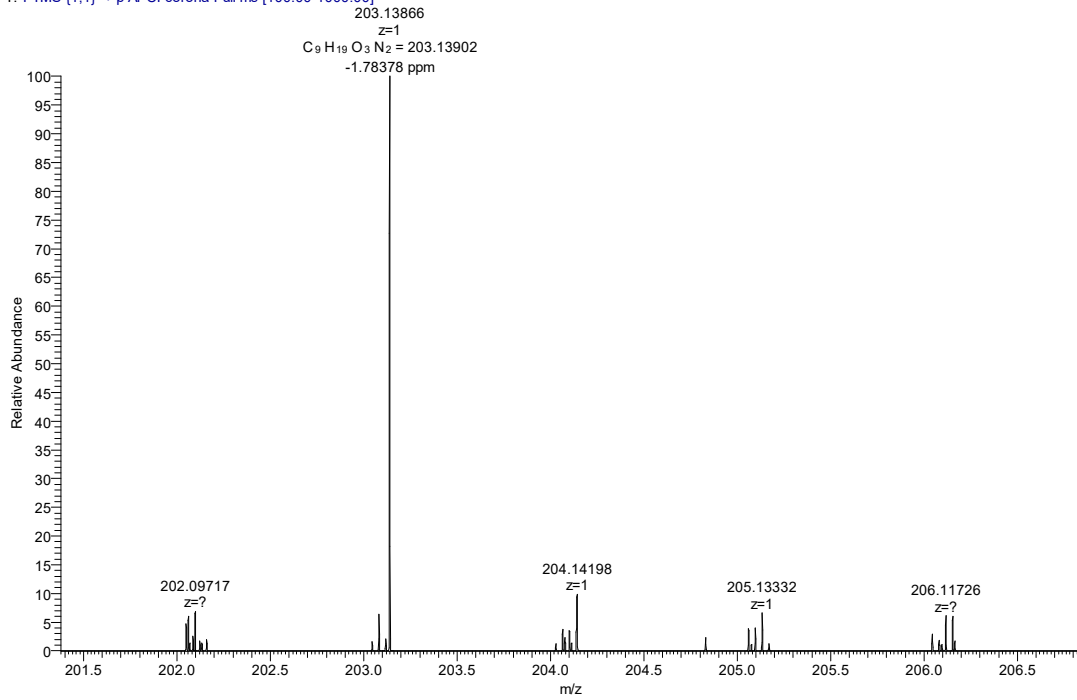

| Sample No. | Formula (M)                                                    | Ion Formula                                                    | Measured m/z | Calc m/z | Diff (ppm) |
|------------|----------------------------------------------------------------|----------------------------------------------------------------|--------------|----------|------------|
| 31         | C <sub>28</sub> H <sub>32</sub> IN <sub>3</sub> O <sub>4</sub> | C <sub>28</sub> H <sub>31</sub> IN <sub>3</sub> O <sub>4</sub> | 600.1361     | 600.1354 | 0.12       |

1033 #5 RT: 0.07 AV: 1 NL: 9.11E4  
 T: FTMS (1,1) + pAPCI corona Full ms [100.00-1000.00]

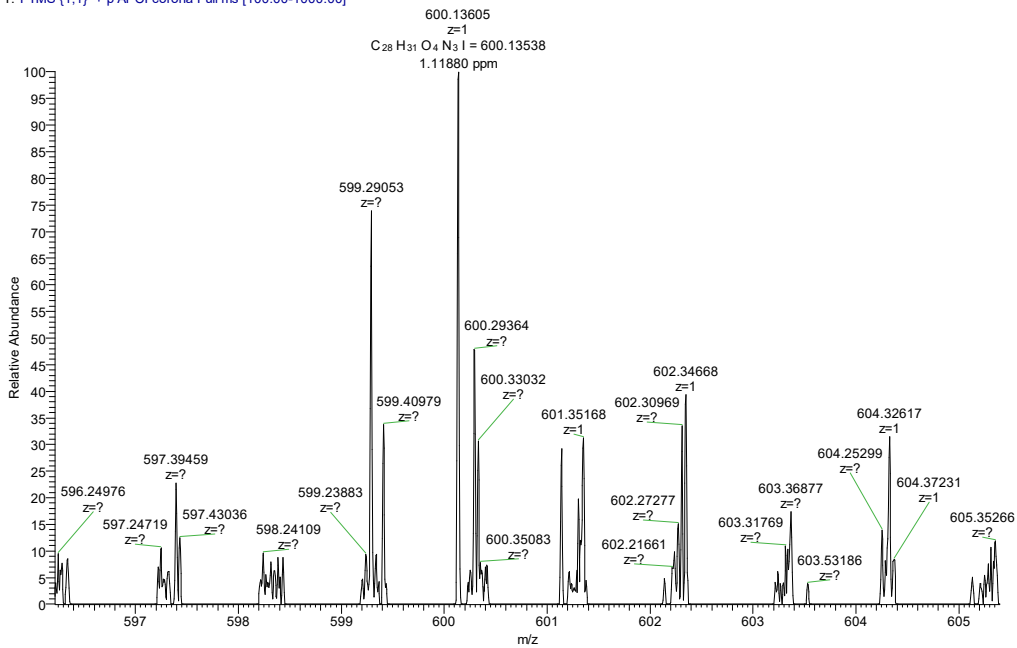

| Sample No. | Formula (M)                                     | Ion Formula                                     | Measured m/z | Calc m/z | Diff (ppm) |
|------------|-------------------------------------------------|-------------------------------------------------|--------------|----------|------------|
| 32         | C <sub>14</sub> H <sub>11</sub> NO <sub>2</sub> | C <sub>14</sub> H <sub>12</sub> NO <sub>2</sub> | 226.0856     | 226.0863 | -0.31      |

1039 #23 RT: 0.27 AV: 1 NL: 1.02E5  
 T: FTMS (1,1) + p APCI corona Full ms [100.00-1000.00]

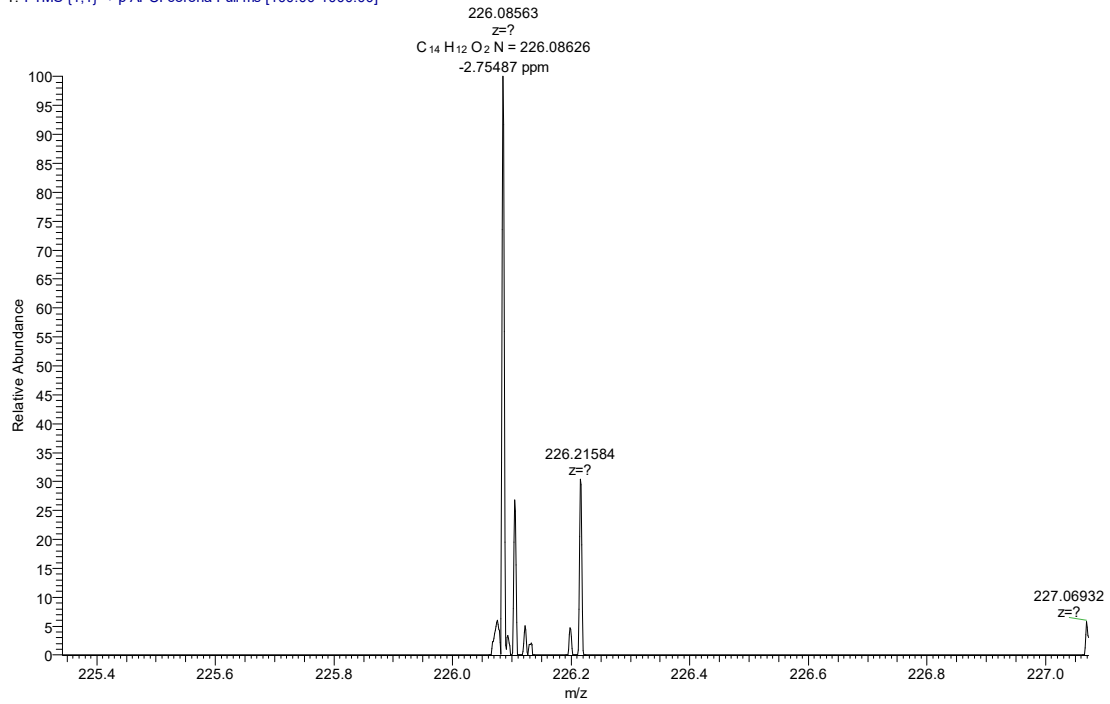

| Sample No. | Formula (M)                                                    | Ion Formula                                                    | Measured m/z | Calc m/z | Diff (ppm) |
|------------|----------------------------------------------------------------|----------------------------------------------------------------|--------------|----------|------------|
| 33         | C <sub>27</sub> H <sub>20</sub> IN <sub>3</sub> O <sub>3</sub> | C <sub>27</sub> H <sub>21</sub> IN <sub>3</sub> O <sub>3</sub> | 562.0607     | 562.0622 | -0.27      |

1039 #23 RT: 0.27 AV: 1 NL: 2.38E4  
 T: FTMS (1,1) + p APCI corona Full ms [100.00-1000.00]

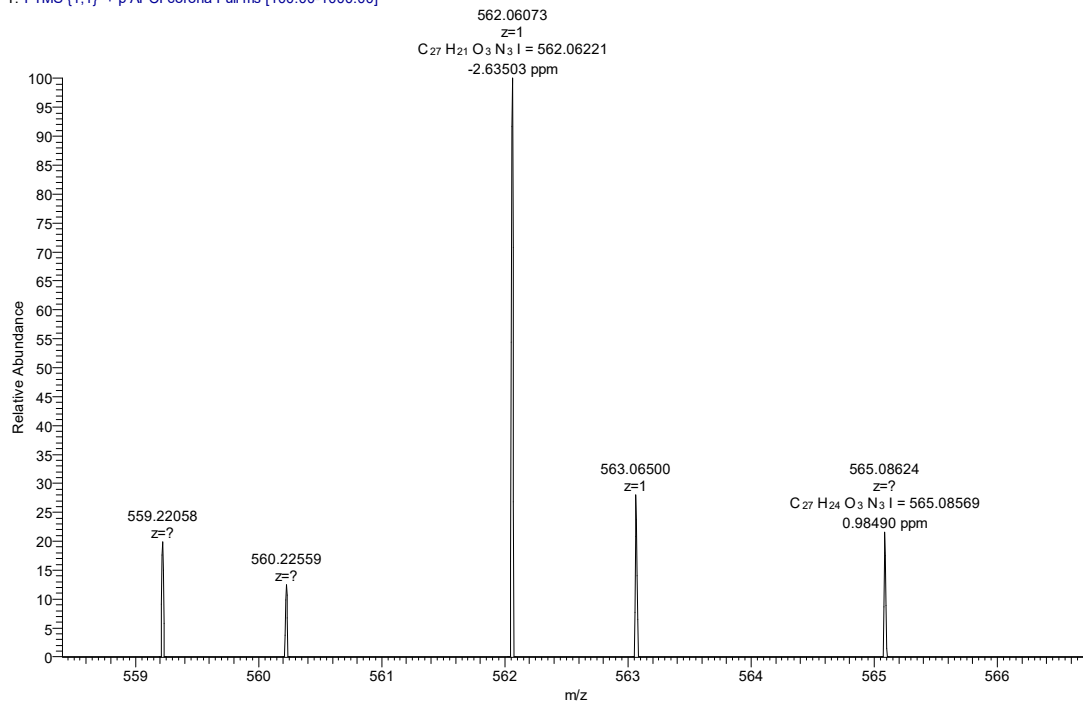

## Crystallographic details

(1) First, nitro product **6** was solved with the mixture of 1.5 mL acetonitrile and 3 mL diethyl ether in a sample bottle, respectively, which was sealed/placed on the desk of the laboratory. Next, the crystal of the fused cycle **6** was precipitated via volatilizing after several days.

(2) A single crystal of product **6** was obtained as follows: A proper crystal was selected and detected on a “Bruker APEX2” diffractometer. The crystal stayed at 299.0 K during data collection. With the assistance of Shelxtl, the structure was solved with the XShell structure solution program using Charge Flipping, and it was refined with the SHELXL [1] refinement package using Least Squares minimisation. Finally, crystal data and structure refinement parameters of product **6** are described as shown in **Table S1**. CCDC No. 2361719.

[1]. Sheldrick, G.M. (2015). Acta Cryst. C71, 3-8.

Table S1. Crystal data and structure refinement for product **6**.

|                                                                |                                                                 |
|----------------------------------------------------------------|-----------------------------------------------------------------|
| CCDC                                                           | 2361719                                                         |
| Displacement ellipsoids are drawn at the 30% probability level |                                                                 |
| Empirical formula                                              | C <sub>19</sub> H <sub>13</sub> ClN <sub>2</sub> O <sub>4</sub> |
| Formula weight                                                 | 368.779                                                         |
| Temperature/K                                                  | 299.00                                                          |
| Crystal system                                                 | triclinic                                                       |
| Space group                                                    | P-1                                                             |
| a/Å                                                            | 10.670(9)                                                       |
| b/Å                                                            | 10.941(10)                                                      |
| c/Å                                                            | 28.681(19)                                                      |
| α/°                                                            | 89.79(3)                                                        |
| β/°                                                            | 89.93(3)                                                        |
| γ/°                                                            | 89.86(3)                                                        |
| Volume/Å <sup>3</sup>                                          | 3348(5)                                                         |

|                                                |                                                                    |
|------------------------------------------------|--------------------------------------------------------------------|
| Z                                              | 8                                                                  |
| $\rho_{\text{calc}}/\text{cm}^3$               | 1.463                                                              |
| $\mu/\text{mm}^{-1}$                           | 0.257                                                              |
| F(000)                                         | 1522.2                                                             |
| Radiation                                      | Mo K $\alpha$ ( $\lambda = 0.71073$ )                              |
| 2 $\Theta$ range for data collection/ $^\circ$ | 3.82 to 42.64                                                      |
| Index ranges                                   | $-10 \leq h \leq 10$ , $-11 \leq k \leq 11$ , $-29 \leq l \leq 29$ |
| Reflections collected                          | 23978                                                              |
| Independent reflections                        | 7374 [ $R_{\text{int}} = 0.0722$ , $R_{\text{sigma}} = 0.0748$ ]   |
| Data/restraints/parameters                     | 7374/0/941                                                         |
| Goodness-of-fit on $F^2$                       | 1.127                                                              |
| Final R indexes [ $I \geq 2\sigma(I)$ ]        | $R_1 = 0.0556$ , $wR_2 = 0.1088$                                   |
| Final R indexes [all data]                     | $R_1 = 0.1044$ , $wR_2 = 0.1370$                                   |
| Largest diff. peak/hole / $e \text{ \AA}^{-3}$ | 0.39/-0.54                                                         |

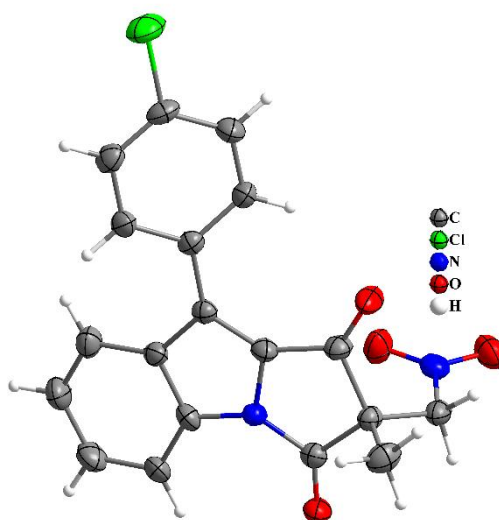

Fig. S1 Structure of product 6.



### Physical data for the following products:

#### 1. 9-iodo-2-methyl-2-(nitromethyl)-1H-pyrrolo[1,2-a]indole-1,3(2H)-dione

A yellow liquid after purification by flash column chromatography (petroleum ether/ethyl acetate = 10:1), 35.4 mg, yield 92 %.

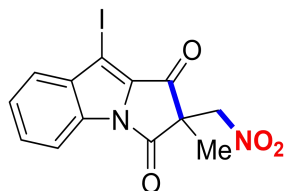

$^1\text{H}$  NMR (600 MHz,  $\text{CDCl}_3$ ):  $\delta$  8.12 (d,  $J = 8.4$  Hz, 1H), 7.66 (t,  $J = 7.8$  Hz, 2H), 7.51 (t,  $J = 7.8$  Hz, 1H), 4.99 (d,  $J = 16.2$  Hz, 1H), 4.95 (d,  $J = 16.2$  Hz, 1H), 1.52 (s, 3H).  $^{13}\text{C}$  NMR (150 MHz,  $\text{CDCl}_3$ ):  $\delta$  187.0, 167.3, 136.7, 135.5, 132.6, 130.1, 126.2, 124.4, 115.3, 74.9, 68.7, 55.2, 18.5. HRMS (ESI,  $m/z$ ): Calculated for  $\text{C}_{13}\text{H}_{10}\text{N}_2\text{O}_4\text{I}$  ( $\text{M}+\text{H}$ ) $^+$  384.9680, found 384.9676.

#### 2. 9-bromo-2-methyl-2-(nitromethyl)-1H-pyrrolo[1,2-a]indole-1,3(2H)-dione

A yellow liquid after purification by flash column chromatography (petroleum ether/ethyl acetate = 10:1), 30.4 mg, yield 90 %.

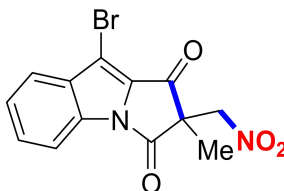

$^1\text{H}$  NMR (400 MHz,  $\text{CDCl}_3$ ):  $\delta$  8.16 (d,  $J = 8.4$  Hz, 1H), 7.79 (d,  $J = 8.0$  Hz, 1H), 7.68 (t,  $J = 7.2$  Hz, 1H), 7.52 (t,  $J = 7.6$  Hz, 1H), 4.99 (d,  $J = 16.4$  Hz, 1H), 4.94 (d,  $J = 16.0$  Hz, 1H), 1.53 (s, 3H).  $^{13}\text{C}$  NMR (100 MHz,  $\text{CDCl}_3$ ):  $\delta$  186.3, 167.4, 133.6, 132.2, 131.6, 130.2, 126.2, 122.6, 115.4, 100.6, 74.9, 55.2, 18.6. HRMS (ESI,  $m/z$ ): Calculated for  $\text{C}_{13}\text{H}_9\text{N}_2\text{O}_4\text{BrNa}$  ( $\text{M}+\text{Na}$ ) $^+$  358.9638, found 358.9637.

#### 3. 2-methyl-2-(nitromethyl)-1H-pyrrolo[1,2-a]indole-1,3(2H)-dione

A yellow oily liquid after purification by flash column chromatography (petroleum ether/ethyl acetate = 10:1), 16 mg, yield 62 %.

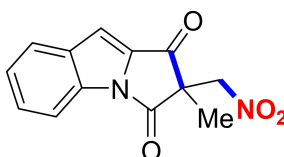

$^1\text{H}$  NMR (400 MHz,  $\text{CDCl}_3$ ):  $\delta$  8.17 (dd,  $J = 8.4, 0.8$  Hz, 1H), 7.83 (d,  $J = 8.4$  Hz, 1H), 7.64 – 7.60 (m, 1H), 7.47 – 7.43 (m, 1H), 7.31 (s, 1H), 4.96 (s, 2H), 1.51 (s, 3H).  $^{13}\text{C}$  NMR (100 MHz,  $\text{CDCl}_3$ ):  $\delta$  187.8, 168.1, 134.8, 133.7, 132.9, 129.1, 125.7, 124.4, 115.3, 108.9, 74.9, 55.0, 18.6. HRMS (ESI,  $m/z$ ): Calculated for  $\text{C}_{13}\text{H}_{10}\text{N}_2\text{O}_4\text{Na}$  ( $\text{M}+\text{Na}$ ) $^+$  281.0533, found 281.0533.

#### 4. 2-methyl-2-(nitromethyl)-9-phenyl-1H-pyrrolo[1,2-a]indole-1,3(2H)-dione

A yellow liquid after purification by flash column chromatography (petroleum ether/ethyl acetate = 10:1), 26.7 mg, yield 80 %.

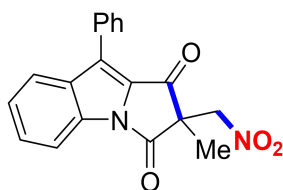

$^1\text{H}$  NMR (400 MHz,  $\text{CDCl}_3$ ):  $\delta$  8.26 (d,  $J = 8.4$  Hz, 1H), 8.05 (d,  $J = 8.0$  Hz, 1H), 7.94 – 7.91 (m, 2H), 7.67 (t,  $J = 7.2$  Hz, 1H), 7.56 (t,  $J = 7.2$  Hz, 2H), 7.49 (t,  $J = 7.2$  Hz, 2H), 4.97 (s, 2H), 1.53 (s, 3H).  $^{13}\text{C}$  NMR (100 MHz,  $\text{CDCl}_3$ ):  $\delta$  187.4, 168.2, 133.1, 132.7, 130.2, 129.7, 129.5, 129.4, 128.9, 126.6, 125.9, 123.7, 115.6, 75.0, 55.3, 18.8. HRMS (ESI,  $m/z$ ): Calculated for  $\text{C}_{19}\text{H}_{14}\text{N}_2\text{O}_4\text{Na}$  ( $\text{M}+\text{Na}$ ) $^+$  357.0846, found 357.0844.

#### 5. 9-(4-fluorophenyl)-2-methyl-2-(nitromethyl)-1H-pyrrolo[1,2-a]indole-1,3(2H)-dione

A yellow solid after purification by flash column chromatography (petroleum ether/ethyl acetate = 10:1), 32 mg, yield 91 %. Mp: 89-90 °C.

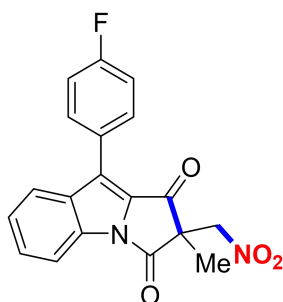

$^1\text{H}$  NMR (400 MHz,  $\text{CDCl}_3$ ):  $\delta$  8.25 (d,  $J = 8.4$  Hz, 1H), 8.00 (d,  $J = 8.0$  Hz, 1H), 7.92 (dd,  $J = 8.4, 5.6$  Hz, 2H), 7.67 (t,  $J = 7.6$  Hz, 1H), 7.50 (dd,  $J = 8.0, 7.6$  Hz, 1H), 7.27 – 7.23 (m, 2H), 4.97 (s, 2H), 1.53 (s, 3H).  $^{13}\text{C}$  NMR (100 MHz,  $\text{CDCl}_3$ ):  $\delta$  187.5, 168.1, 163.3(d,  $J = 248.9$  Hz), 132.8(d,  $J = 45.6$  Hz), 131.5, 131.4, 129.6, 129.5,

126.3(d,  $J = 3.3$  Hz), 125.9, 125.4, 123.4, 116.1, 115.9, 115.6, 75.0, 55.3, 18.7.  $^{19}\text{F}$  NMR (565 MHz,  $\text{CDCl}_3$ ):  $\delta$  -110.69 (s, 1F). HRMS (ESI,  $m/z$ ): Calculated for  $\text{C}_{19}\text{H}_{13}\text{FN}_2\text{O}_4\text{Na}$  ( $\text{M}+\text{Na}$ ) $^+$  375.0752, found 375.0752.

6. 9-(4-chlorophenyl)-2-methyl-2-(nitromethyl)-1H-pyrrolo[1,2-a]indole-1,3(2H)-dione

A yellow solid after purification by flash column chromatography (petroleum ether/ethyl acetate = 10:1), 30.2 mg, yield 82 %. Mp: 126-127 °C.

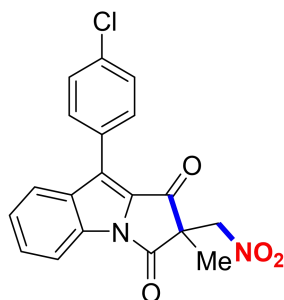

$^1\text{H}$  NMR (400 MHz,  $\text{CDCl}_3$ ):  $\delta$  8.25 (d,  $J = 8.4$  Hz, 1H), 7.99 (d,  $J = 8.0$  Hz, 1H), 7.88 – 7.86 (m, 2H), 7.70 – 7.64 (m, 1H), 7.55 – 7.48 (m, 3H), 4.98 (s, 2H), 1.53 (s, 3H).

$^{13}\text{C}$  NMR (100 MHz,  $\text{CDCl}_3$ ):  $\delta$  187.5, 168.1, 135.5, 133.0, 132.4, 130.7, 129.9, 129.8, 129.5, 129.3, 129.2, 128.6, 126.0, 125.1, 123.3, 115.6, 75.0, 55.2, 18.7. HRMS (ESI,  $m/z$ ): Calculated for  $\text{C}_{19}\text{H}_{13}\text{ClN}_2\text{O}_4\text{Na}$  ( $\text{M}+\text{Na}$ ) $^+$  391.0456, found 391.0456.

7. 9-(3-bromophenyl)-2-methyl-2-(nitromethyl)-1H-pyrrolo[1,2-a]indole-1,3(2H)-dione

A yellow liquid after purification by flash column chromatography (petroleum ether/ethyl acetate = 20:1), 30.2 mg, yield 73 %.

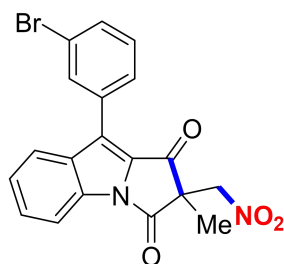

$^1\text{H}$  NMR (400 MHz,  $\text{CDCl}_3$ ):  $\delta$  8.25 (d,  $J = 8.4$  Hz, 1H), 8.07 (t,  $J = 2.0$  Hz, 1H), 8.01 (d,  $J = 8.4$  Hz, 1H), 7.87 – 7.84 (m, 1H), 7.70 – 7.66 (m, 1H), 7.63-7.61 (m, 1H), 7.54 – 7.49 (m, 1H), 7.43 (t,  $J = 8.0$  Hz, 1H), 4.98 (s, 2H), 1.53 (s, 3H).  $^{13}\text{C}$  NMR (100 MHz,  $\text{CDCl}_3$ ):  $\delta$  187.4, 168.1, 132.9, 132.3, 132.2, 132.1, 130.4, 130.0, 129.6, 128.1,

126.1, 124.5, 123.3, 122.9, 115.6, 75.0, 55.2, 18.7. HRMS (ESI, m/z): Calculated for  $C_{19}H_{13}BrN_2O_4Na$  ( $M+Na$ )<sup>+</sup> 436.9933, found 436.9929.

8. 2-methyl-2-(nitromethyl)-9-(p-tolyl)-1H-pyrrolo[1,2-a]indole-1,3(2H)-dione

A yellow solid after purification by flash column chromatography (petroleum ether/ethyl acetate = 10:1), 29.3 mg, yield 86 %.

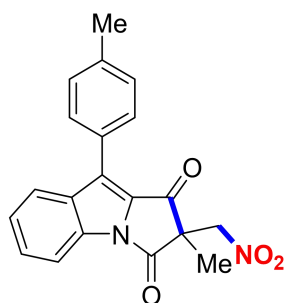

<sup>1</sup>H NMR (400 MHz, CDCl<sub>3</sub>): δ 8.25 (d, *J* = 8.4 Hz, 1H), 8.05 (d, *J* = 8.0 Hz, 1H), 7.83 (d, *J* = 8.0 Hz, 2H), 7.68 – 7.61 (m, 1H), 7.50 – 7.46 (m, 1H), 7.37 (d, *J* = 8.0 Hz, 2H), 4.97 (s, 2H), 2.45 (s, 3H), 1.52 (s, 3H). <sup>13</sup>C NMR (100 MHz, CDCl<sub>3</sub>): δ 187.4, 168.2, 139.8, 133.1, 132.8, 129.8, 129.6, 129.5, 129.4, 129.3, 128.6, 127.3, 126.8, 125.8, 123.7, 115.5, 75.0, 55.2, 21.5, 18.8. HRMS (ESI, m/z): Calculated for  $C_{20}H_{16}N_2O_4Na$  ( $M+Na$ )<sup>+</sup> 371.1002, found 371.1001.

9. 2-methyl-2-(nitromethyl)-9-(m-tolyl)-1H-pyrrolo[1,2-a]indole-1,3(2H)-dione

A yellow solid after purification by flash column chromatography (petroleum ether/ethyl acetate = 10:1), 28.5 mg, yield 82 %. Mp: 144-145 °C.

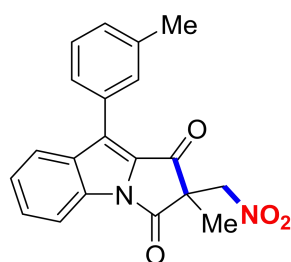

<sup>1</sup>H NMR (400 MHz, CDCl<sub>3</sub>): δ 8.24 (d, *J* = 8.0 Hz, 1H), 8.04 (d, *J* = 8.0 Hz, 1H), 7.74 – 7.70 (m, 2H), 7.66 (t, *J* = 7.6 Hz, 1H), 7.46 (dt, *J* = 15.6, 7.6 Hz, 2H), 7.31 (d, *J* = 7.6 Hz, 1H), 4.96 (s, 2H), 2.48 (s, 3H), 1.52 (s, 3H). <sup>13</sup>C NMR (100 MHz, CDCl<sub>3</sub>): δ 187.4, 168.2, 138.6, 133.0, 132.8, 130.3, 130.1, 129.7, 129.3, 128.8, 126.8, 126.6,

125.8, 123.78, 115.5, 75.0, 55.3, 21.5, 18.8. HRMS (ESI, m/z): Calculated for  $C_{20}H_{16}N_2O_4Na$  ( $M+Na$ )<sup>+</sup> 371.1002, found 371.1001.

10. 9-(4-methoxyphenyl)-2-methyl-2-(nitromethyl)-1H-pyrrolo[1,2-a]indole-1,3(2H)-dione

A green solid after purification by flash column chromatography (petroleum ether/ethyl acetate = 10:1), 30.2 mg, yield 83 %. Mp: 122-123 °C.

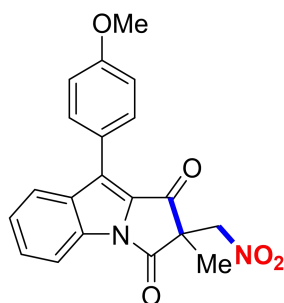

<sup>1</sup>H NMR (400 MHz, CDCl<sub>3</sub>): δ 8.24 (d, *J* = 8.4 Hz, 1H), 8.05 (d, *J* = 8.4 Hz, 1H), 7.91 (d, *J* = 8.8 Hz, 2H), 7.66 (t, *J* = 7.2 Hz, 1H), 7.48 (t, *J* = 7.6 Hz, 1H), 7.08 (d, *J* = 8.8 Hz, 2H), 4.97 (s, 2H), 3.90 (s, 3H), 1.52 (s, 3H). <sup>13</sup>C NMR (100 MHz, CDCl<sub>3</sub>): δ 187.4, 168.1, 160.6, 133.1, 132.8, 131.0, 129.3, 129.1, 126.7, 125.7, 123.7, 122.7, 115.5, 114.4, 75.0, 55.4, 55.3, 18.8. HRMS (ESI, m/z): Calculated for  $C_{20}H_{16}N_2O_5Na$  ( $M+Na$ )<sup>+</sup> 387.0951, found 387.0950.

11. 3-(2-methyl-2-(nitromethyl)-1,3-dioxo-2,3-dihydro-1H-pyrrolo[1,2-a]indol-9-yl)benzonitrile

A yellow solid after purification by flash column chromatography (petroleum ether/ethyl acetate = 5:1), 26.9 mg, yield 75 %. Mp: 142-143 °C.

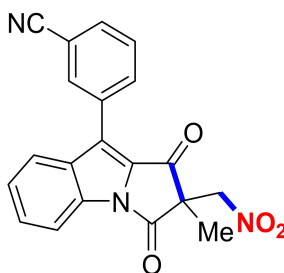

<sup>1</sup>H NMR (400 MHz, CDCl<sub>3</sub>): δ 8.27 (d, *J* = 8.4 Hz, 1H), 8.20 (d, *J* = 1.2 Hz, 1H), 8.19 – 8.16 (m, 1H), 7.98 (d, *J* = 8.4 Hz, 1H), 7.79-7.61 (m, 1H), 7.72 (dd, *J* = 9.8, 2.2 Hz, 1H), 7.68 (dd, *J* = 7.8, 4.2 Hz, 1H), 7.56 – 7.52 (m, 1H), 4.99 (s, 2H), 1.55 (s, 3H). <sup>13</sup>C NMR (100 MHz, CDCl<sub>3</sub>): δ 187.5, 168.1, 133.7, 132.9, 132.7, 132.6, 132.0, 131.7, 130.3, 129.8, 129.7, 126.4, 123.3, 122.8, 118.3, 115.8, 113.3, 75.00, 55.2, 18.7.

HRMS (ESI,  $m/z$ ): Calculated for  $C_{20}H_{13}N_3O_4Na$  ( $M+Na$ )<sup>+</sup> 382.0798, found 382.0797.

12. 9-(4-(tert-butyl)phenyl)-2-methyl-2-(nitromethyl)-1H-pyrrolo[1,2-a]indole-1,3(2H)-dione

A yellow solid after purification by flash column chromatography (petroleum ether/ethyl acetate = 5:1), 35.1 mg, yield 90 %. Mp: 124-125 °C.

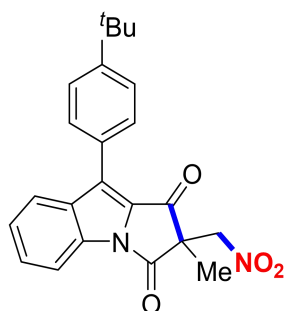

<sup>1</sup>H NMR (400 MHz, CDCl<sub>3</sub>): δ 8.25 (d,  $J$  = 8.4 Hz, 1H), 8.08 (d,  $J$  = 8.4 Hz, 1H), 7.89 (d,  $J$  = 8.4 Hz, 2H), 7.66 (t,  $J$  = 7.6 Hz, 1H), 7.59 (d,  $J$  = 8.4 Hz, 2H), 7.48 (t,  $J$  = 7.2 Hz, 1H), 4.97 (s, 2H), 1.53 (s, 3H), 1.40 (s, 9H). <sup>13</sup>C NMR (100 MHz, CDCl<sub>3</sub>): δ 187.4, 168.16, 152.8, 133.1, 132.8, 129.5, 129.3, 129.2, 127.3, 126.7, 125.9, 125.7, 123.8, 115.5, 75.0, 55.3, 34.9, 31.2, 18.8. HRMS (ESI,  $m/z$ ): Calculated for  $C_{23}H_{22}N_2O_4Na$  ( $M+Na$ )<sup>+</sup> 413.1472, found 413.1470.

13. 9-([1,1'-biphenyl]-4-yl)-2-methyl-2-(nitromethyl)-1H-pyrrolo[1,2-a]indole-1,3(2H)-dione

A yellow solid after purification by flash column chromatography (petroleum ether/ethyl acetate = 10:1), 31.2 mg, yield 76 %. Mp: 151-152 °C.

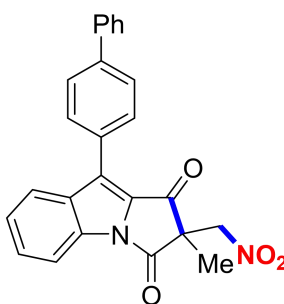

<sup>1</sup>H NMR (400 MHz, CDCl<sub>3</sub>): δ 8.26 (d,  $J$  = 8.4 Hz, 1H), 8.10 (d,  $J$  = 8.4 Hz, 1H), 8.02 (d,  $J$  = 8.4 Hz, 2H), 7.78 (d,  $J$  = 8.4 Hz, 2H), 7.68 (dd,  $J$  = 7.2, 5.6 Hz, 3H), 7.50 (dd,  $J$  = 16.4, 8.4 Hz, 3H), 7.39 (t,  $J$  = 7.6 Hz, 1H), 4.98 (s, 2H), 1.54 (s, 3H). <sup>13</sup>C NMR (100 MHz, CDCl<sub>3</sub>): δ 187.5, 168.2, 142.3, 140.3, 133.1, 132.7, 129.9, 129.7, 129.4,

129.2, 128.9, 127.8, 127.6, 127.1, 126.2, 125.9, 123.7, 115.6, 75.0, 55.3, 18.8. HRMS (ESI, m/z): Calculated for  $C_{25}H_{18}N_2O_4Na$  ( $M+Na$ )<sup>+</sup> 433.1159, found 433.1158.

14. 2-methyl-9-(naphthalen-2-yl)-2-(nitromethyl)-1H-pyrrolo[1,2-a]indole-1,3(2H)-dione

A yellow solid after purification by flash column chromatography (petroleum ether/ethyl acetate = 20:1), 29.2 mg, yield 76 %. Mp: 102-103 °C.

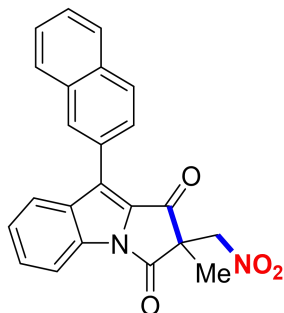

<sup>1</sup>H NMR (400 MHz, CDCl<sub>3</sub>): δ 8.46 (s, 1H), 8.33 (d, *J* = 8.4 Hz, 1H), 8.18 (d, *J* = 8.0 Hz, 1H), 8.06 (s, 2H), 8.04 – 8.00 (m, 1H), 7.97 – 7.95 (m, 1H), 7.74 (t, *J* = 7.2 Hz, 1H), 7.62 – 7.55 (m, 3H), 5.03 (s, 2H), 1.59 (s, 3H). <sup>13</sup>C NMR (100 MHz, CDCl<sub>3</sub>): δ 187.4, 168.2, 133.6, 133.3, 133.1, 132.9, 129.9, 129.5, 129.2, 128.6, 128.5, 127.8, 127.7, 127.1, 126.8, 126.6, 126.0, 123.7, 115.6, 75.0, 55.3, 18.8. HRMS (ESI, m/z): Calculated for  $C_{23}H_{16}N_2O_4Na$  ( $M+Na$ )<sup>+</sup> 407.1002, found 407.1002.

15. 9-(furan-2-yl)-2-methyl-2-(nitromethyl)-1H-pyrrolo[1,2-a]indole-1,3(2H)-dione

A yellow liquid after purification by flash column chromatography (petroleum ether/ethyl acetate = 10:1), 17.0 mg, yield 52 %.

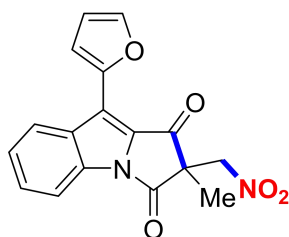

<sup>1</sup>H NMR (400 MHz, CDCl<sub>3</sub>): δ 8.54 (d, *J* = 8.0 Hz, 1H), 8.19 (d, *J* = 8.4 Hz, 1H), 7.79 (d, *J* = 3.2 Hz, 1H), 7.67 (dd, *J* = 12.8, 4.8 Hz, 2H), 7.51 (t, *J* = 7.6 Hz, 1H), 6.65 (s, 1H), 5.00 (d, *J* = 16.0 Hz, 1H), 4.95 (d, *J* = 16.0 Hz, 1H), 1.53 (s, 3H). <sup>13</sup>C NMR (100 MHz, CDCl<sub>3</sub>): δ 186.4, 168.1, 147.9, 144.2, 133.0, 130.7, 129.7, 127.4, 126.0, 125.7, 115.6, 115.2, 114.4, 112.5, 75.0, 55.2, 18.9. HRMS (ESI, m/z): Calculated for  $C_{17}H_{12}N_2O_5Na$  ( $M+Na$ )<sup>+</sup> 347.0638, found 347.0638.

16. 4-(2-methyl-2-(nitromethyl)-1,3-dioxo-2,3-dihydro-1H-pyrrolo[1,2-a]indol-9-yl)phenyl methacrylate

A green liquid after purification by flash column chromatography (petroleum ether/ethyl acetate = 10:1), 17.1 mg, yield 41 %.

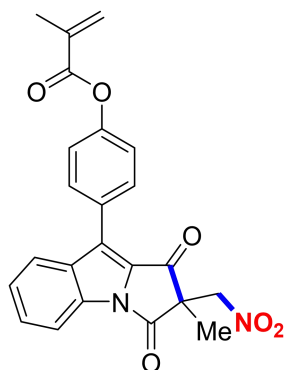

$^1\text{H}$  NMR (400 MHz,  $\text{CDCl}_3$ ):  $\delta$  8.25 (d,  $J = 8.0$  Hz, 1H), 8.04 (d,  $J = 8.4$  Hz, 1H), 7.97 (d,  $J = 8.4$  Hz, 2H), 7.68 (t,  $J = 8.0$  Hz, 1H), 7.50 (t,  $J = 7.8$  Hz, 1H), 7.33 (d,  $J = 8.8$  Hz, 2H), 6.40 (s, 1H), 5.81 (d,  $J = 1.3$  Hz, 1H), 4.97 (s, 2H), 2.10 (s, 3H), 1.53 (s, 3H).  $^{13}\text{C}$  NMR (100 MHz,  $\text{CDCl}_3$ ):  $\delta$  187.4, 168.2, 165.6, 151.7, 135.7, 133.0, 132.6, 130.7, 129.5, 127.8, 127.7, 126.0, 125.6, 123.5, 122.2, 115.6, 75.0, 55.3, 18.8, 18.4. HRMS (ESI,  $m/z$ ): Calculated for  $\text{C}_{23}\text{H}_{18}\text{N}_2\text{O}_6\text{Na}$  ( $\text{M}+\text{Na}$ ) $^+$  441.1057, found 441.1055.

17. 2-(azidomethyl)-9-iodo-2-methyl-1H-pyrrolo[1,2-a]indole-1,3(2H)-dione

A yellow liquid after purification by flash column chromatography (petroleum ether/ethyl acetate = 20:1), 23.2 mg, yield 61 %.

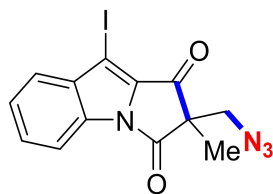

$^1\text{H}$  NMR (600 MHz,  $\text{CDCl}_3$ ):  $\delta$  8.18 – 8.16 (m, 1H), 7.67-7.64 (m, 2H), 7.52 – 7.49 (m, 1H), 3.90 (d,  $J = 12.0$  Hz, 1H), 3.86 (d,  $J = 12.0$  Hz, 1H), 1.44 (s, 3H).  $^{13}\text{C}$  NMR (150 MHz,  $\text{CDCl}_3$ ):  $\delta$  189.6, 168.8, 137.0, 136.0, 132.4, 129.9, 127.3, 126.2, 124.4,



115.5, 67.2, 57.6, 54.5, 17.4. HRMS (ESI,  $m/z$ ): Calculated for  $C_{13}H_{10}N_4O_2I$  ( $M+H$ )<sup>+</sup> 380.9843, found 380.9837.

18. 2-(azidomethyl)-9-bromo-2-methyl-1H-pyrrolo[1,2-a]indole-1,3(2H)-dione

A yellow liquid after purification by flash column chromatography (petroleum ether/ethyl acetate = 20:1), 16.7 mg, yield 50 %.

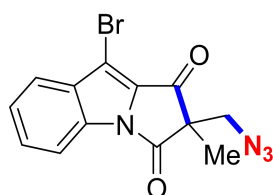

<sup>1</sup>H NMR (400 MHz,  $CDCl_3$ ):  $\delta$  8.20 (d,  $J = 8.4$  Hz, 1H), 7.77 (d,  $J = 8.0$  Hz, 1H), 7.67 (t,  $J = 8.0$  Hz, 1H), 7.51 (t,  $J = 7.8$  Hz, 1H), 3.90 (d,  $J = 12.0$  Hz, 1H), 3.86 (d,  $J = 12.0$  Hz, 1H), 1.44 (s, 3H). <sup>13</sup>C NMR (100 MHz,  $CDCl_3$ ):  $\delta$  188.9, 169.0, 133.8, 132.1, 131.9, 130.0, 126.1, 122.6, 115.5, 99.2, 57.6, 54.5, 17.4. HRMS (ESI,  $m/z$ ): Calculated for  $C_{13}H_9BrN_4O_2Na$  ( $M+Na$ )<sup>+</sup> 354.9801, found 354.9801.

19. 2-(azidomethyl)-2-methyl-1H-pyrrolo[1,2-a]indole-1,3(2H)-dione

A yellow liquid after purification by flash column chromatography (petroleum ether/ethyl acetate = 20:1), 10.4 mg, yield 41 %.

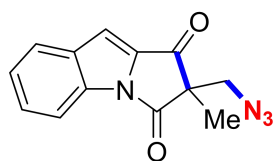

<sup>1</sup>H NMR (400 MHz,  $CDCl_3$ ):  $\delta$  8.21 (d,  $J = 8.0$  Hz, 1H), 7.82 (d,  $J = 8.0$  Hz, 1H), 7.62 (t,  $J = 7.6$  Hz, 1H), 7.44 (t,  $J = 7.2$  Hz, 1H), 7.25 (s, 1H), 3.87 (s, 2H), 1.43 (s, 3H). <sup>13</sup>C NMR (100 MHz,  $CDCl_3$ ):  $\delta$  190.4, 169.7, 135.4, 134.0, 132.6, 128.9, 125.7, 124.3, 115.5, 107.7, 57.3, 54.5, 17.5. HRMS (ESI,  $m/z$ ): Calculated for  $C_{13}H_{10}N_4O_2Na$  ( $M+Na$ )<sup>+</sup> 277.0696, found 277.0697.

20. 2-(azidomethyl)-2-methyl-9-phenyl-1H-pyrrolo[1,2-a]indole-1,3(2H)-dione

A yellow liquid after purification by flash column chromatography (petroleum ether/ethyl acetate = 20:1), 20.1 mg, yield 62 %.

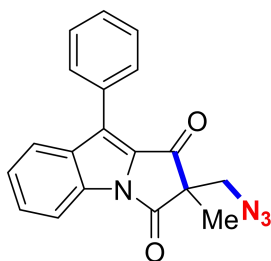

$^1\text{H}$  NMR (400 MHz,  $\text{CDCl}_3$ ):  $\delta$  8.30 (d,  $J = 8.4$  Hz, 1H), 8.04 (d,  $J = 8.4$  Hz, 1H), 7.95 – 7.92 (m, 2H), 7.66 (t,  $J = 7.6$  Hz, 1H), 7.56 (t,  $J = 7.2$  Hz, 2H), 7.51 – 7.46 (m, 2H), 3.91 (d,  $J = 11.6$  Hz, 1H), 3.87 (d,  $J = 11.6$  Hz, 1H), 1.45 (s, 3H).  $^{13}\text{C}$  NMR (100 MHz,  $\text{CDCl}_3$ ):  $\delta$  189.9, 169.7, 133.0, 132.7, 130.3, 130.2, 129.5, 129.3, 129.2, 128.9, 125.8, 125.3, 123.6, 115.7, 57.6, 54.6, 17.7. HRMS (ESI,  $m/z$ ): Calculated for  $\text{C}_{19}\text{H}_{14}\text{N}_4\text{O}_2\text{Na}$  ( $\text{M}+\text{Na}$ ) $^+$  353.1009, found 353.1009.

#### 21. 2-(azidomethyl)-9-(4-fluorophenyl)-2-methyl-1H-pyrrolo[1,2-a]indole-1,3(2H)-dione

A yellow liquid after purification by flash column chromatography (petroleum ether/ethyl acetate = 20:1), 15.3 mg, yield 44 %.

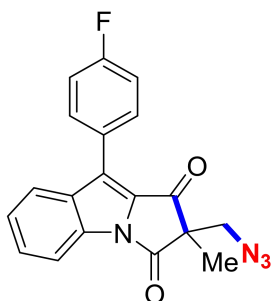

$^1\text{H}$  NMR (400 MHz,  $\text{CDCl}_3$ ):  $\delta$  8.30 (d,  $J = 8.4$  Hz, 1H), 7.99 (d,  $J = 8.4$  Hz, 1H), 7.95 – 7.91 (m, 2H), 7.69 – 7.65 (m, 1H), 7.48 (dd,  $J = 14.8, 7.2$  Hz, 1H), 7.27–7.23 (m, 2H), 3.90 (d,  $J = 12.0$  Hz, 1H), 3.87 (d,  $J = 12.0$  Hz, 1H), 1.45 (s, 3H).  $^{13}\text{C}$  NMR (100 MHz,  $\text{CDCl}_3$ ):  $\delta$  190.0, 169.6, 163.2(d,  $J = 248.6$  Hz), 132.7(d,  $J = 7.8$  Hz), 131.4(d,  $J = 8.3$  Hz), 130.2, 129.3, 126.4, 125.9, 124.2, 123.3, 116.1, 115.9, 115.7, 57.6, 54.6, 17.6.  $^{19}\text{F}$  NMR (565 MHz,  $\text{CDCl}_3$ ):  $\delta$  -110.94(s, 1F). HRMS (ESI,  $m/z$ ): Calculated for  $\text{C}_{19}\text{H}_{14}\text{FN}_4\text{O}_2$  ( $\text{M}+\text{H}$ ) $^+$  349.1095, found 349.1087.

#### 22. 2-(azidomethyl)-9-(4-chlorophenyl)-2-methyl-1H-pyrrolo[1,2-a]indole-1,3(2H)-dione

A yellow liquid after purification by flash column chromatography (petroleum ether/ethyl acetate = 20:1), 16.4 mg, yield 45 %.

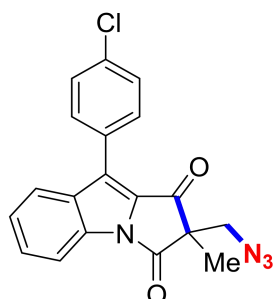

$^1\text{H}$  NMR (400 MHz,  $\text{CDCl}_3$ ):  $\delta$  8.30 (d,  $J = 8.4$  Hz, 1H), 7.99 (d,  $J = 8.0$  Hz, 1H), 7.88 (d,  $J = 8.4$  Hz, 2H), 7.69 – 7.64 (m, 1H), 7.54-7.49 (m, 3H), 3.91 (d,  $J = 12.0$  Hz, 1H), 3.87 (d,  $J = 12.0$  Hz, 1H), 1.45 (s, 3H).  $^{13}\text{C}$  NMR (100 MHz,  $\text{CDCl}_3$ ):  $\delta$  190.0, 169.6, 135.3, 132.7, 130.7, 129.5, 129.4, 129.1, 128.8, 126.9, 126.0, 123.9, 123.3, 115.8, 57.6, 54.6, 17.6. HRMS (ESI,  $m/z$ ): Calculated for  $\text{C}_{19}\text{H}_{13}\text{ClN}_4\text{O}_2\text{Na}$  ( $\text{M}+\text{Na}$ ) $^+$  387.0619, found 387.0619.

### 23. 2-(azidomethyl)-9-(3-bromophenyl)-2-methyl-1H-pyrrolo[1,2-a]indole-1,3(2H)-dione

A yellow liquid after purification by flash column chromatography (petroleum ether/ethyl acetate = 20:1), 19.2 mg, yield 47%.

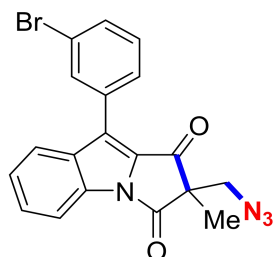

$^1\text{H}$  NMR (400 MHz,  $\text{CDCl}_3$ ):  $\delta$  8.30 (d,  $J = 8.0$  Hz, 1H), 8.08 (t,  $J = 1.6$  Hz, 1H), 8.01 (d,  $J = 8.4$  Hz, 1H), 7.88 – 7.86 (m, 1H), 7.70 – 7.66 (m, 1H), 7.63-7.60 (m, 1H), 7.53 – 7.48 (m, 1H), 7.43 (t,  $J = 8.0$  Hz, 1H), 3.91 (d,  $J = 12.0$  Hz, 1H), 3.88 (d,  $J = 9.2$  Hz, 1H), 1.45 (s, 3H).  $^{13}\text{C}$  NMR (100 MHz,  $\text{CDCl}_3$ ):  $\delta$  189.9, 169.7, 132.6, 132.5, 132.4, 132.2, 132.1, 130.6, 130.4, 129.4, 128.1, 126.1, 123.3, 123.2, 122.8, 115.7, 57.6, 54.6, 17.6. HRMS (ESI,  $m/z$ ): Calculated for  $\text{C}_{19}\text{H}_{13}\text{BrN}_4\text{O}_2\text{Na}$  ( $\text{M}+\text{Na}$ ) $^+$  433.0096, found 433.0094.

### 24. 2-(azidomethyl)-2-methyl-9-(p-tolyl)-1H-pyrrolo[1,2-a]indole-1,3(2H)-dione

A yellow solid after purification by flash column chromatography (petroleum ether/ethyl acetate = 20:1), 22.0 mg, yield 64 %. Mp: 120-121 °C.

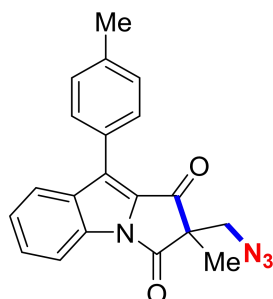

$^1\text{H}$  NMR (400 MHz,  $\text{CDCl}_3$ ):  $\delta$  8.29 (d,  $J = 8.4$  Hz, 1H), 8.04 (d,  $J = 8.4$  Hz, 1H), 7.84 (d,  $J = 8.0$  Hz, 2H), 7.67 – 7.63 (m, 1H), 7.49 – 7.45 (m, 1H), 7.37 (d,  $J = 8.0$  Hz, 2H), 3.90 (d,  $J = 12.0$  Hz, 1H), 3.86 (d,  $J = 11.6$  Hz, 1H), 2.46 (s, 3H), 1.45 (s, 3H).  $^{13}\text{C}$  NMR (100 MHz,  $\text{CDCl}_3$ ):  $\delta$  189.8, 169.7, 139.6, 133.0, 132.8, 130.1, 129.6, 129.4, 129.1, 127.4, 125.7, 125.6, 123.7, 115.6, 57.6, 54.6, 21.5, 17.7. HRMS (ESI,  $m/z$ ): Calculated for  $\text{C}_{20}\text{H}_{16}\text{N}_4\text{O}_2\text{Na}$  ( $\text{M}+\text{Na}$ ) $^+$  367.1165, found 367.1166.

25. 2-(azidomethyl)-9-(4-(tert-butyl)phenyl)-2-methyl-1H-pyrrolo[1,2-a]indole-1,3(2H)-dione

A yellow liquid after purification by flash column chromatography (petroleum ether/ethyl acetate = 20:1), 22.0 mg, yield 57 %.

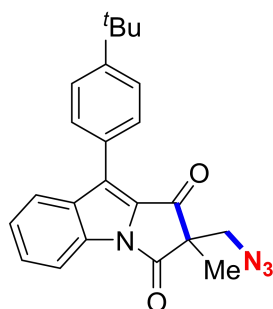

$^1\text{H}$  NMR (400 MHz,  $\text{CDCl}_3$ ):  $\delta$  8.29 (d,  $J = 8.4$  Hz, 1H), 8.07 (d,  $J = 8.0$  Hz, 1H), 7.89 (d,  $J = 8.4$  Hz, 2H), 7.68 – 7.64 (m, 1H), 7.59 – 7.57 (m, 2H), 7.49 – 7.45 (m, 1H), 3.90 (d,  $J = 12.0$  Hz, 1H), 3.86 (d,  $J = 12.0$  Hz, 1H), 1.45 (s, 3H), 1.40 (s, 9H).  $^{13}\text{C}$  NMR (100 MHz,  $\text{CDCl}_3$ ):  $\delta$  189.9, 169.7, 152.6, 133.0, 132.8, 130.1, 129.2, 129.1, 127.5, 125.9, 125.7, 125.5, 123.8, 115.7, 57.6, 54.6, 34.9, 31.2, 17.7. HRMS (ESI,  $m/z$ ): Calculated for  $\text{C}_{23}\text{H}_{22}\text{N}_4\text{O}_2\text{Na}$  ( $\text{M}+\text{Na}$ ) $^+$  409.1635, found 409.1635.

26. 9-([1,1'-biphenyl]-4-yl)-2-(azidomethyl)-2-methyl-1H-pyrrolo[1,2-a]indole-1,3(2H)-dione

A yellow liquid after purification by flash column chromatography (petroleum ether/ethyl acetate = 20:1), 19.9 mg, yield 49 %.

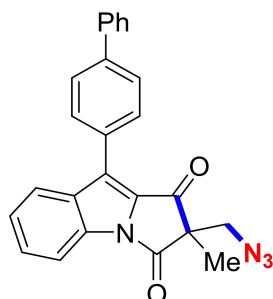

$^1\text{H}$  NMR (400 MHz,  $\text{CDCl}_3$ ):  $\delta$  8.31 (d,  $J = 8.4$  Hz, 1H), 8.10 (d,  $J = 8.0$  Hz, 1H), 8.04 (d,  $J = 8.4$  Hz, 2H), 7.79 (d,  $J = 8.4$  Hz, 2H), 7.70-7.66 (m, 3H), 7.53 – 7.48 (m, 3H), 7.41 (d,  $J = 7.2$  Hz, 1H), 3.92 (d,  $J = 12.0$  Hz, 1H), 3.89 (d,  $J = 12.0$  Hz, 1H), 1.47 (s, 3H).  $^{13}\text{C}$  NMR (100 MHz,  $\text{CDCl}_3$ ):  $\delta$  190.0, 169.7, 142.2, 140.4, 132.9, 132.8, 130.3, 129.9, 129.3, 129.1, 128.9, 127.7, 127.6, 127.1, 125.9, 125.0, 123.6, 115.7, 57.6, 54.6, 17.7. HRMS (ESI,  $m/z$ ): Calculated for  $\text{C}_{25}\text{H}_{19}\text{N}_4\text{O}_2$  ( $\text{M}+\text{H}$ ) $^+$  407.1503, found 407.1493.

27. 2-(azidomethyl)-9-(4-methoxyphenyl)-2-methyl-1H-pyrrolo[1,2-a]indole-1,3-dione

A yellow liquid after purification by flash column chromatography (petroleum ether/ethyl acetate = 20:1), 20.2 mg, yield 56 %.

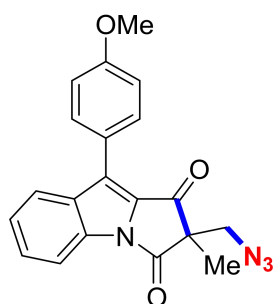

$^1\text{H}$  NMR (400 MHz,  $\text{CDCl}_3$ ):  $\delta$  8.28 (d,  $J = 8.4$  Hz, 1H), 8.04 (d,  $J = 8.4$  Hz, 1H), 7.93 – 7.91 (m, 2H), 7.67-7.63 (m, 1H), 7.49 – 7.45 (m, 1H), 7.11 – 7.08 (m, 2H), 3.90 (s, 3H), 3.88 (d,  $J = 3.4$  Hz, 2H), 1.44 (s, 3H).  $^{13}\text{C}$  NMR (100 MHz,  $\text{CDCl}_3$ ):  $\delta$  189.8, 169.6, 160.5, 133.0, 132.8, 130.9, 129.2, 125.7, 125.5, 123.7, 122.8, 115.7, 114.3, 57.6, 55.4, 54.6, 17.7. HRMS (ESI,  $m/z$ ): Calculated for  $\text{C}_{20}\text{H}_{16}\text{N}_4\text{O}_3\text{Na}$  ( $\text{M}+\text{Na}$ ) $^+$  383.1115, found 383.1114.

28. 3-(2-(azidomethyl)-2-methyl-1,3-dioxo-2,3-dihydro-1H-pyrrolo[1,2-a]indol-9-yl)benzotrile

A yellow liquid after purification by flash column chromatography (petroleum ether/ethyl acetate = 20:1), 15.6 mg, yield 44 %.

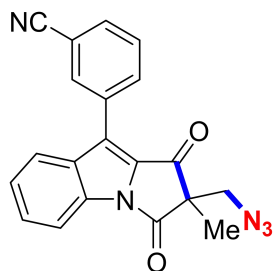

$^1\text{H}$  NMR (400 MHz,  $\text{CDCl}_3$ ):  $\delta$  8.32 (d,  $J = 8.4$  Hz, 1H), 8.21 – 8.18 (m, 2H), 7.97 (d,  $J = 8.0$  Hz, 1H), 7.77 (d,  $J = 8.0$  Hz, 1H), 7.72 – 7.66 (m, 2H), 7.55-7.51 (m, 1H), 3.90 (s, 2H), 1.46 (s, 3H).  $^{13}\text{C}$  NMR (100 MHz,  $\text{CDCl}_3$ ):  $\delta$  190.0, 169.6, 133.7, 132.6, 132.5, 132.2, 131.8, 130.9, 129.8, 129.6, 126.3, 122.8, 122.1, 118.4, 115.9, 113.2, 57.5, 54.6, 17.5. HRMS (ESI,  $m/z$ ): Calculated for  $\text{C}_{20}\text{H}_{13}\text{N}_5\text{O}_2\text{Na}$  ( $\text{M}+\text{Na}$ ) $^+$  378.0961, found 378.0960.

29.

8-iodo-2-methyl-2-((4-phenyl-1H-1,2,3-triazol-1-yl)methyl)cyclopenta[a]indene-1,3-dione

A yellow solid after purification by flash column chromatography (petroleum ether/ethyl acetate = 10:1), 30.5 mg, yield 73 %. Mp: 224-225 °C.

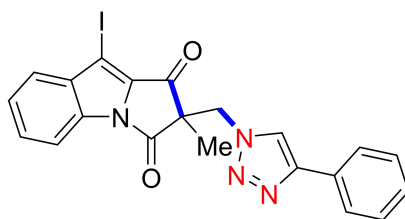

$^1\text{H}$  NMR (400 MHz,  $\text{CDCl}_3$ ):  $\delta$  8.10 (d,  $J = 8.4$  Hz, 1H), 7.77 (s, 1H), 7.69 (d,  $J = 7.6$  Hz, 2H), 7.60 (dd,  $J = 14.4, 7.6$  Hz, 2H), 7.46 (t,  $J = 7.2$  Hz, 1H), 7.36 (t,  $J = 7.2$  Hz, 2H), 7.29 (d,  $J = 7.2$  Hz, 1H), 4.89 (d,  $J = 14.0$  Hz, 1H), 4.84 (d,  $J = 14.0$  Hz, 1H), 1.64 (s, 3H).  $^{13}\text{C}$  NMR (100 MHz,  $\text{CDCl}_3$ ):  $\delta$  188.3, 167.9, 147.9, 136.9, 135.5, 132.4, 130.0, 129.9, 128.7, 128.3, 126.2, 125.7, 124.3, 120.6, 115.4, 68.3, 57.6, 51.6, 19.5. HRMS (ESI,  $m/z$ ): Calculated for  $\text{C}_{21}\text{H}_{15}\text{IN}_4\text{O}_2\text{Na}$  ( $\text{M}+\text{Na}$ ) $^+$  505.0132, found 505.0132.

# Copies of the $^1\text{H}$ NMR, $^{13}\text{C}$ NMR, $^{19}\text{F}$ NMR

## $^1\text{H}$ NMR (600 MHz, $\text{CDCl}_3$ )

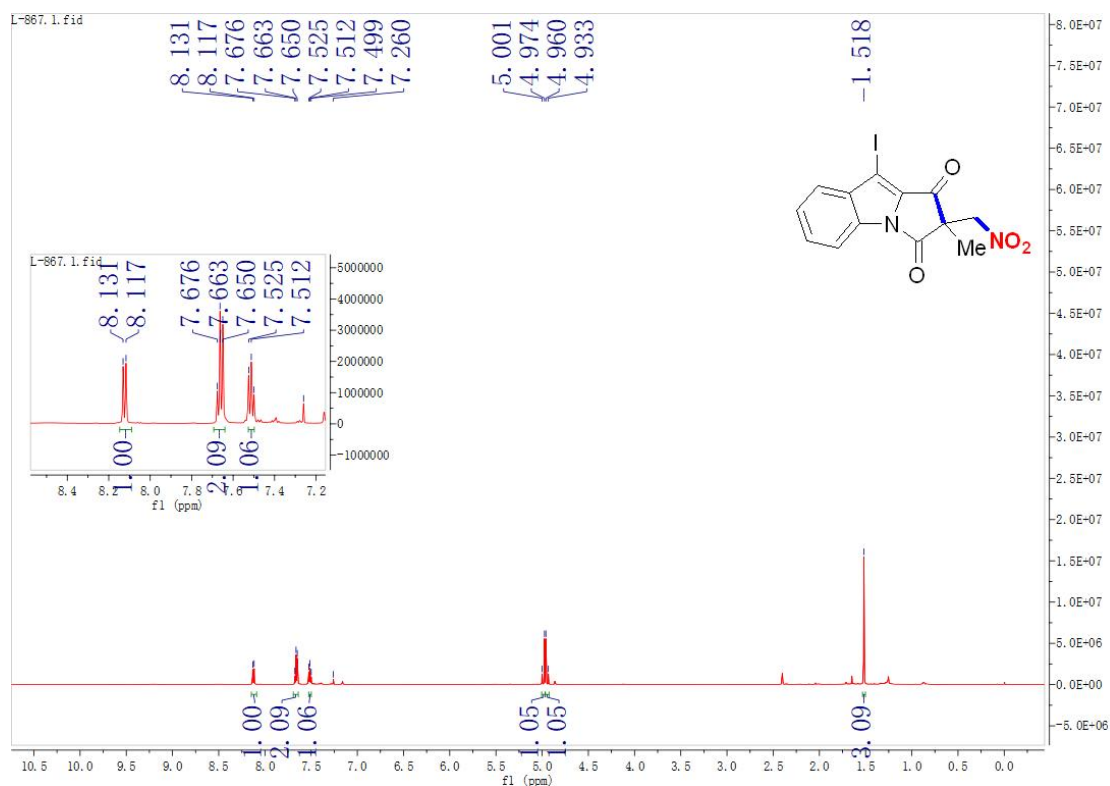

## $^{13}\text{C}$ NMR (150 MHz, $\text{CDCl}_3$ )

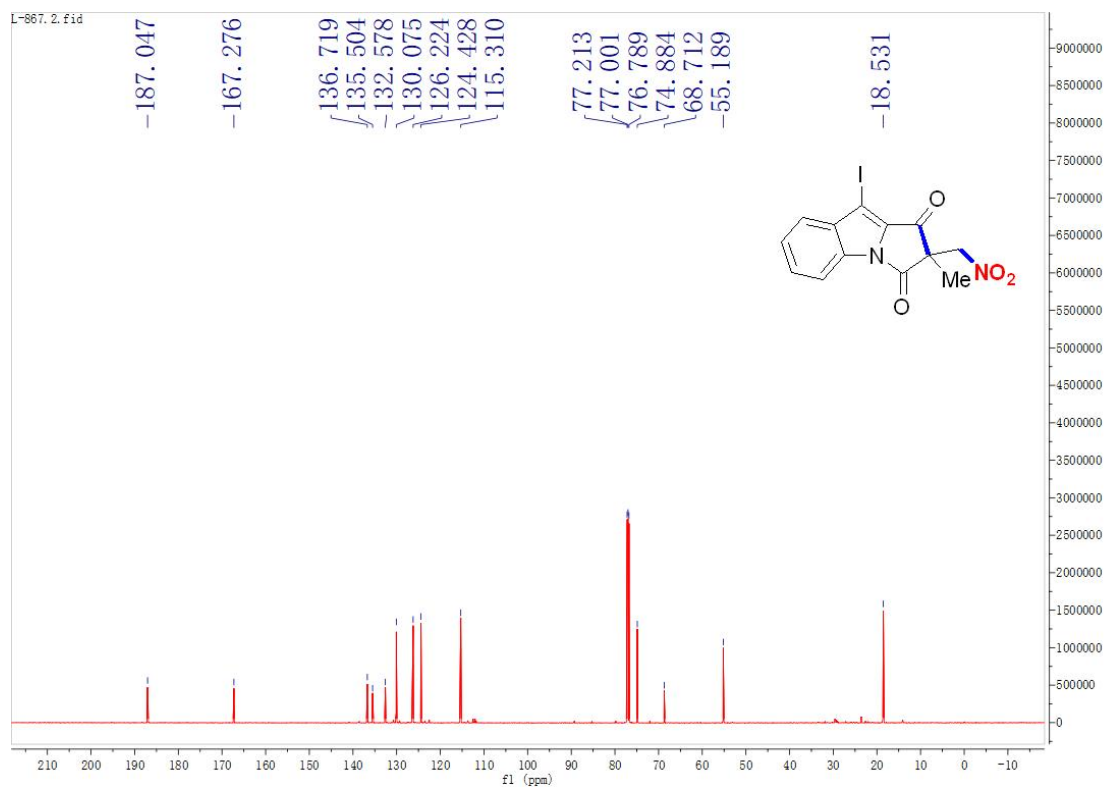

## 2-<sup>1</sup>H NMR (400 MHz, CDCl<sub>3</sub>)

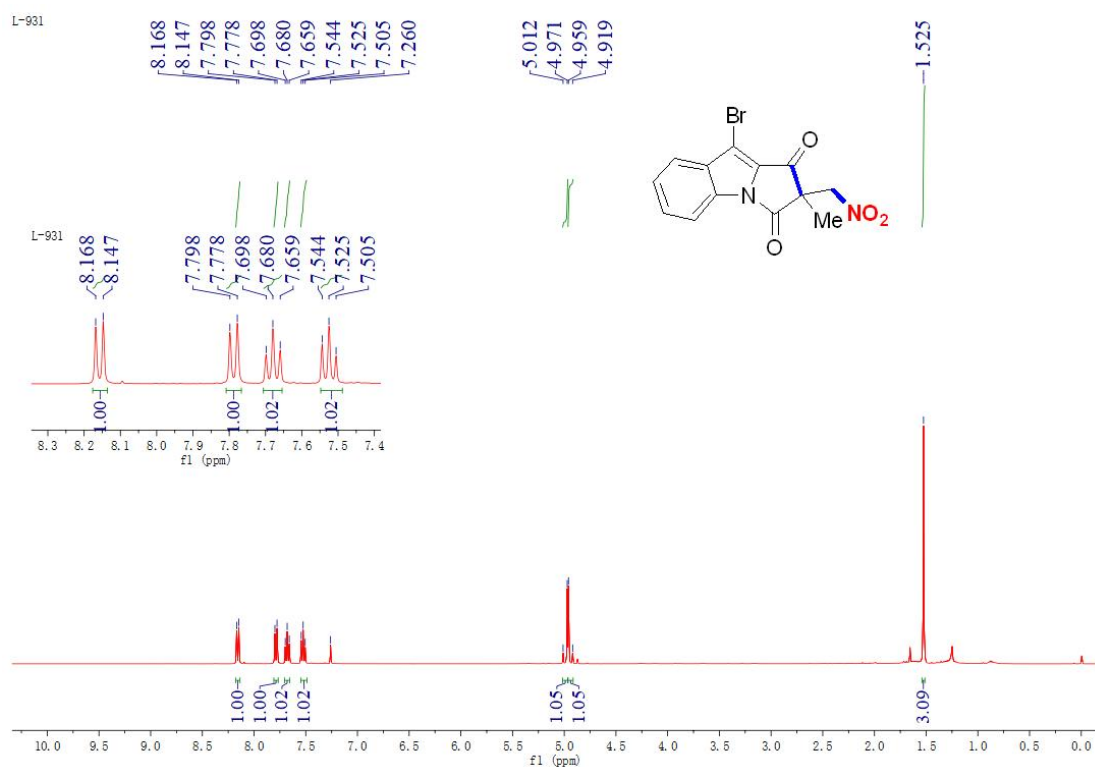

## 2-<sup>13</sup>C NMR (100 MHz, CDCl<sub>3</sub>)

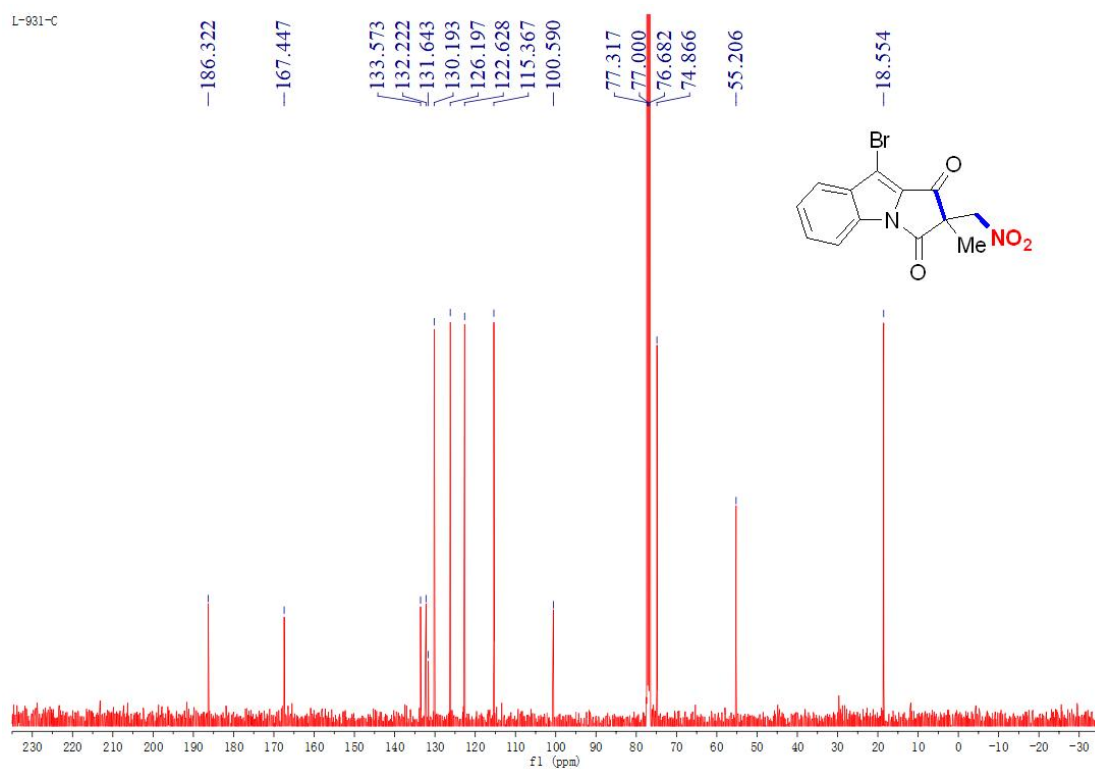



### $^3\text{-}^1\text{H NMR}$ (400 MHz, $\text{CDCl}_3$ )

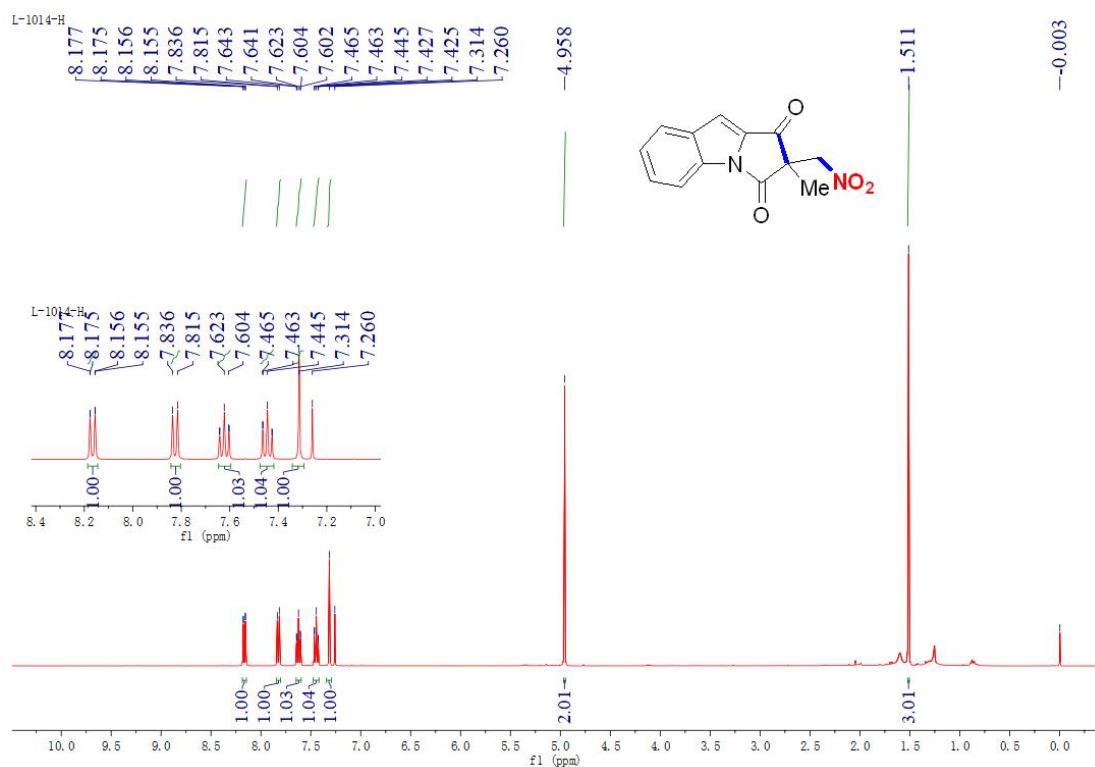

### $^3\text{-}^{13}\text{C NMR}$ (100 MHz, $\text{CDCl}_3$ )

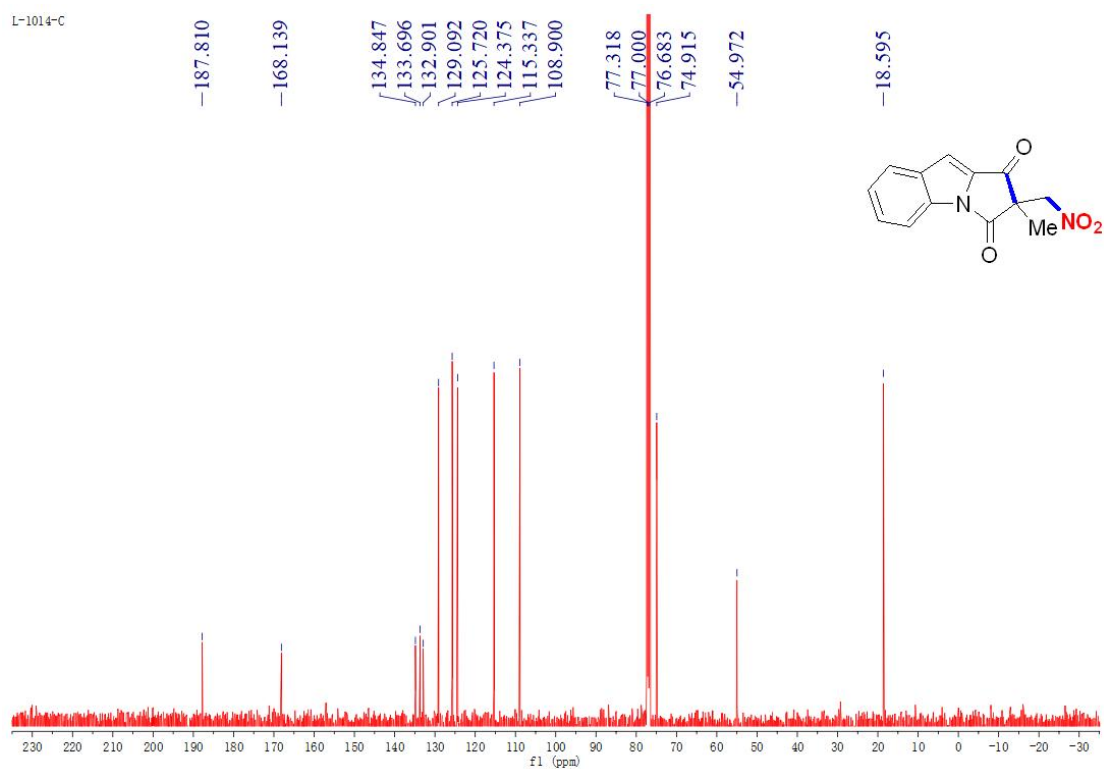

### 4-<sup>1</sup>H NMR (400 MHz, CDCl<sub>3</sub>)

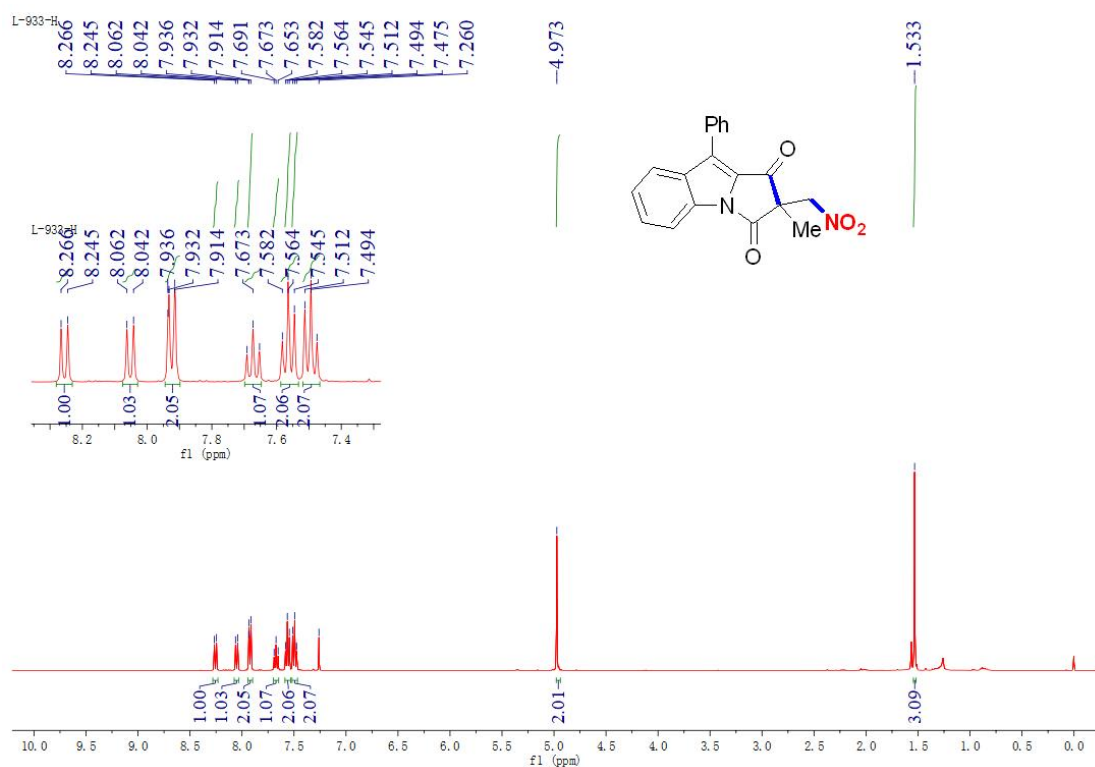

### 4-<sup>13</sup>C NMR (100 MHz, CDCl<sub>3</sub>)

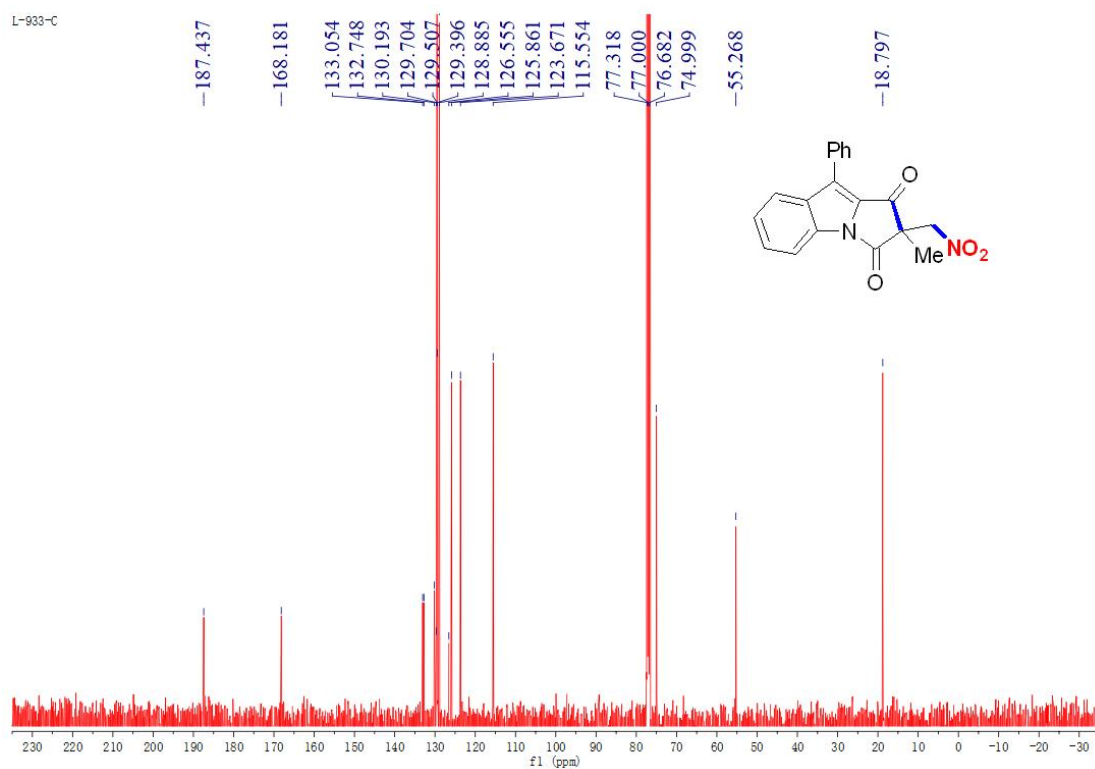

### 5-<sup>1</sup>H NMR (400 MHz, CDCl<sub>3</sub>)

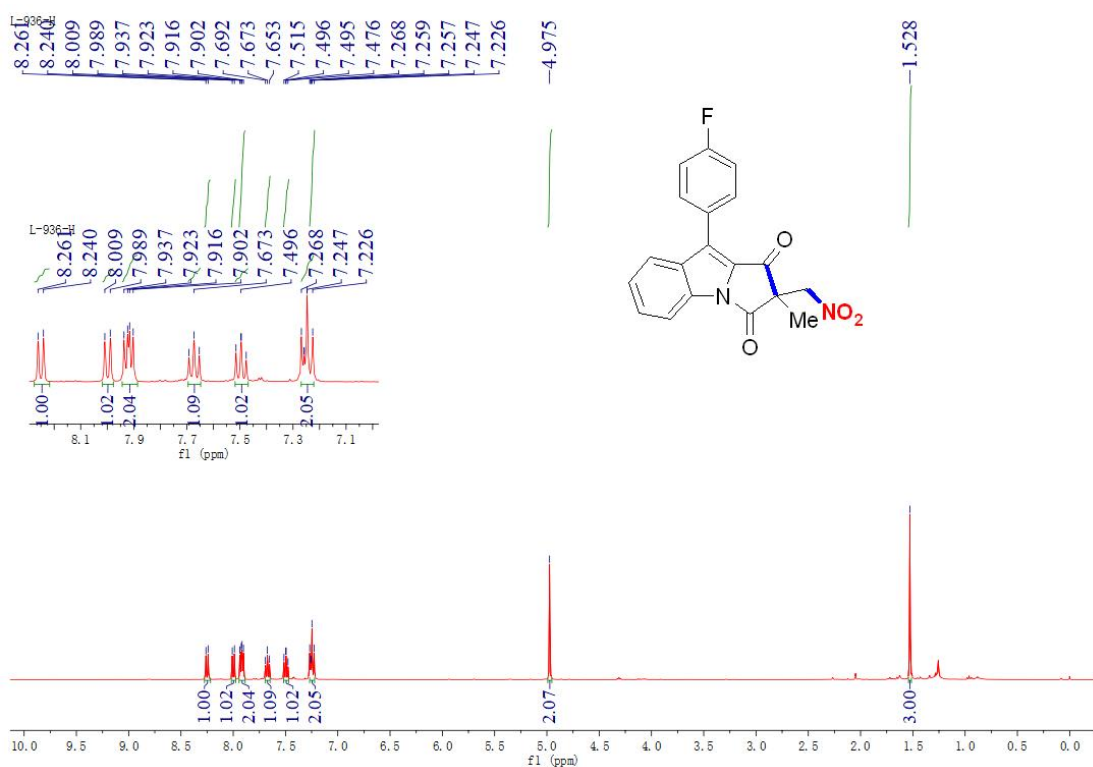

### 5-<sup>13</sup>C NMR (100 MHz, CDCl<sub>3</sub>)

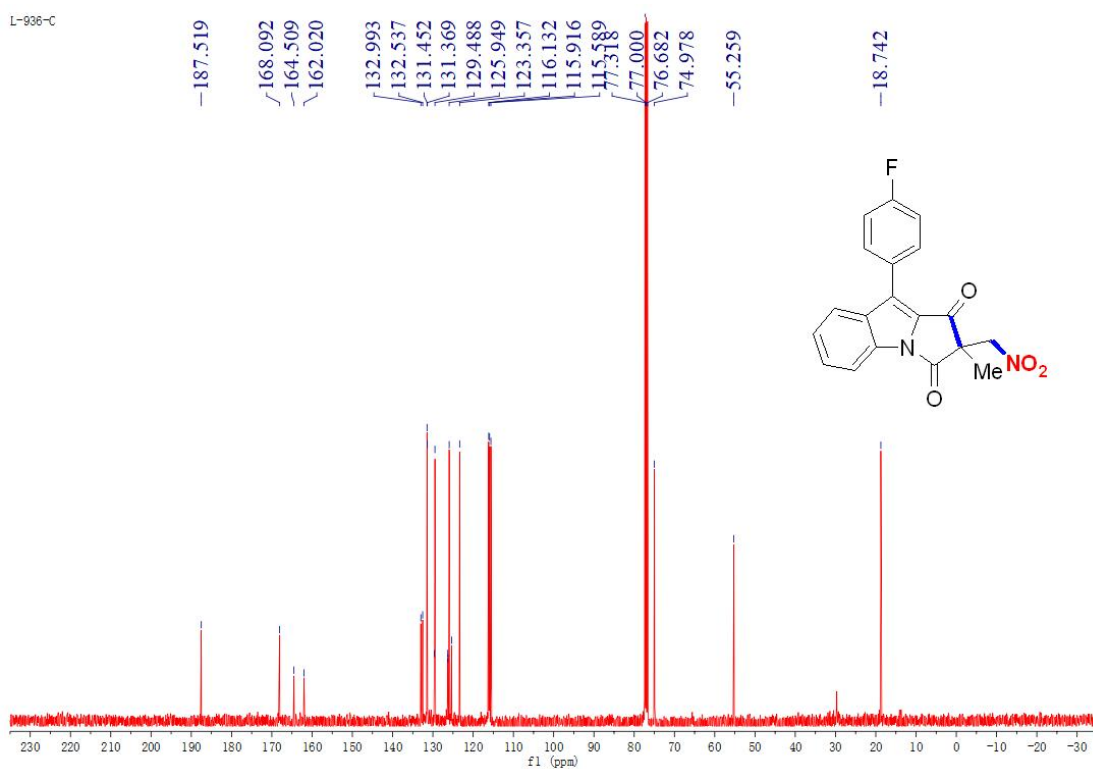

### 5-<sup>19</sup>F NMR (565 MHz, CDCl<sub>3</sub>)

L-936  
F19CPD CDC13 D:\ lizejiang 1

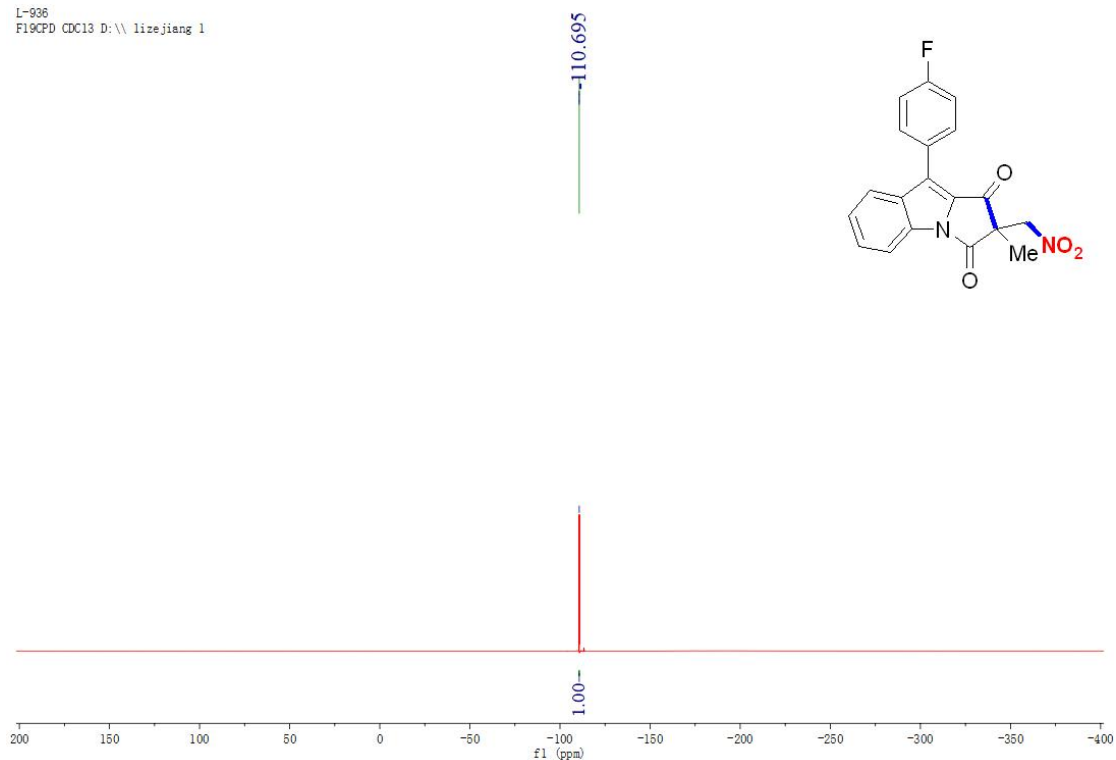

### 6-<sup>1</sup>H NMR (400 MHz, CDCl<sub>3</sub>)

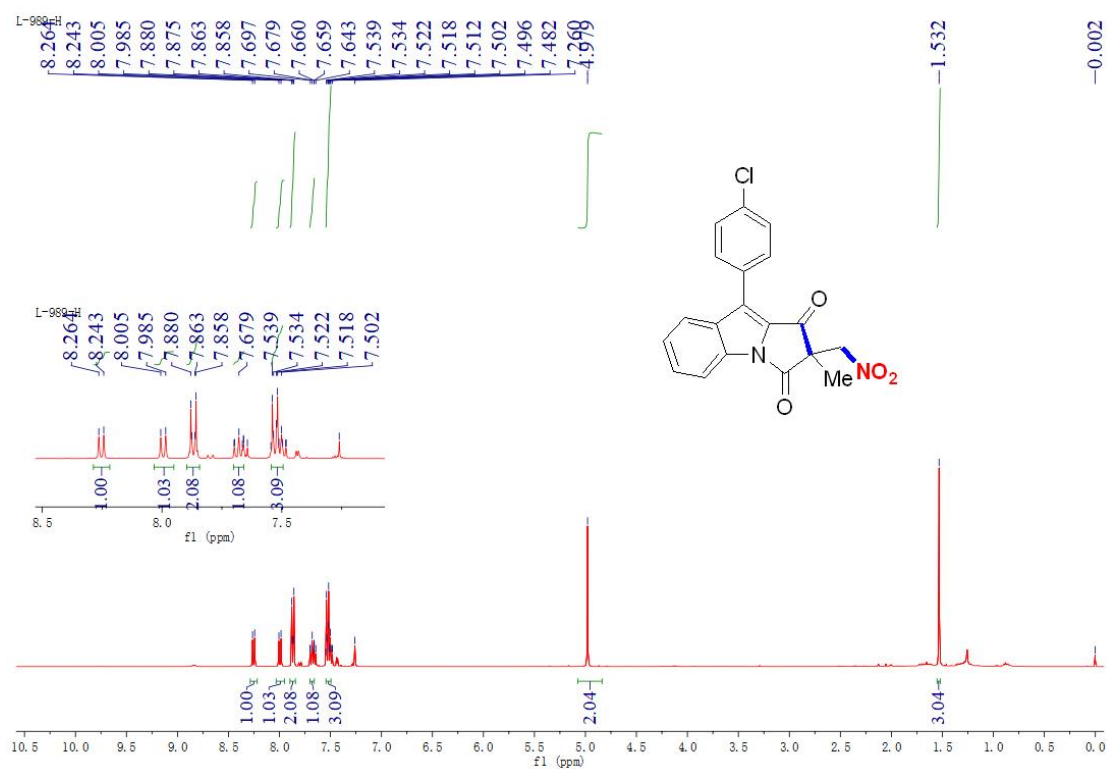

**$^{13}\text{C}$  NMR (100 MHz,  $\text{CDCl}_3$ )**

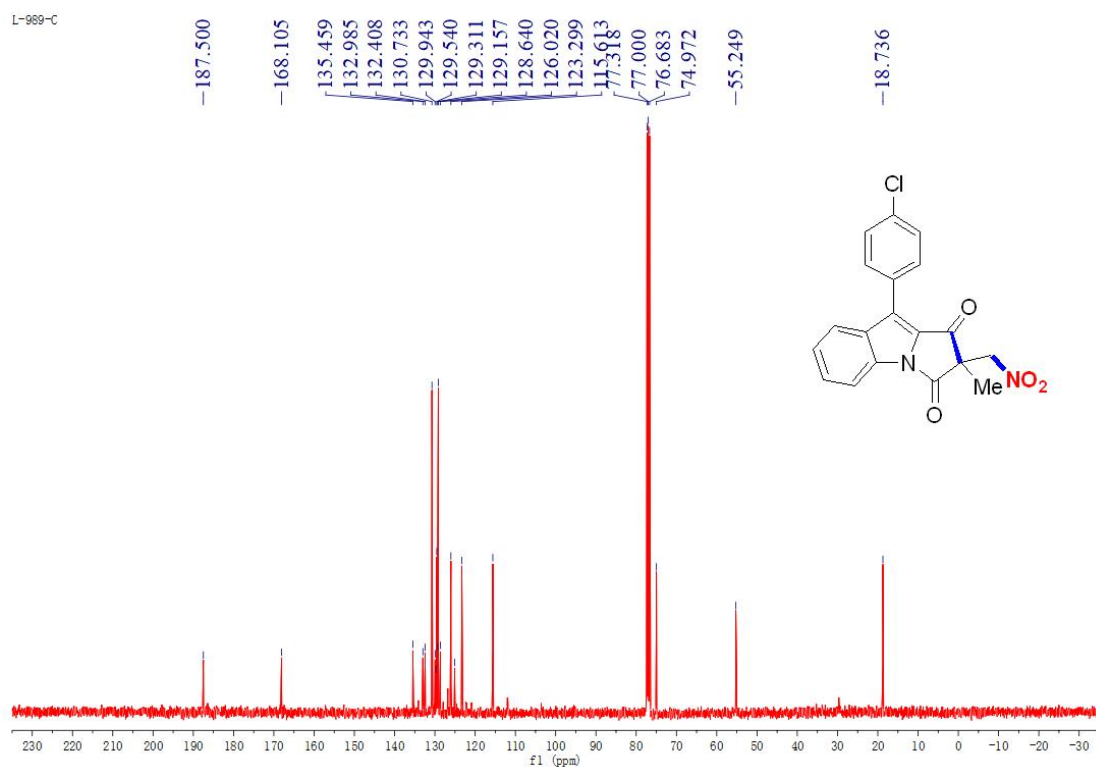

**$^1\text{H}$  NMR (400 MHz,  $\text{CDCl}_3$ )**

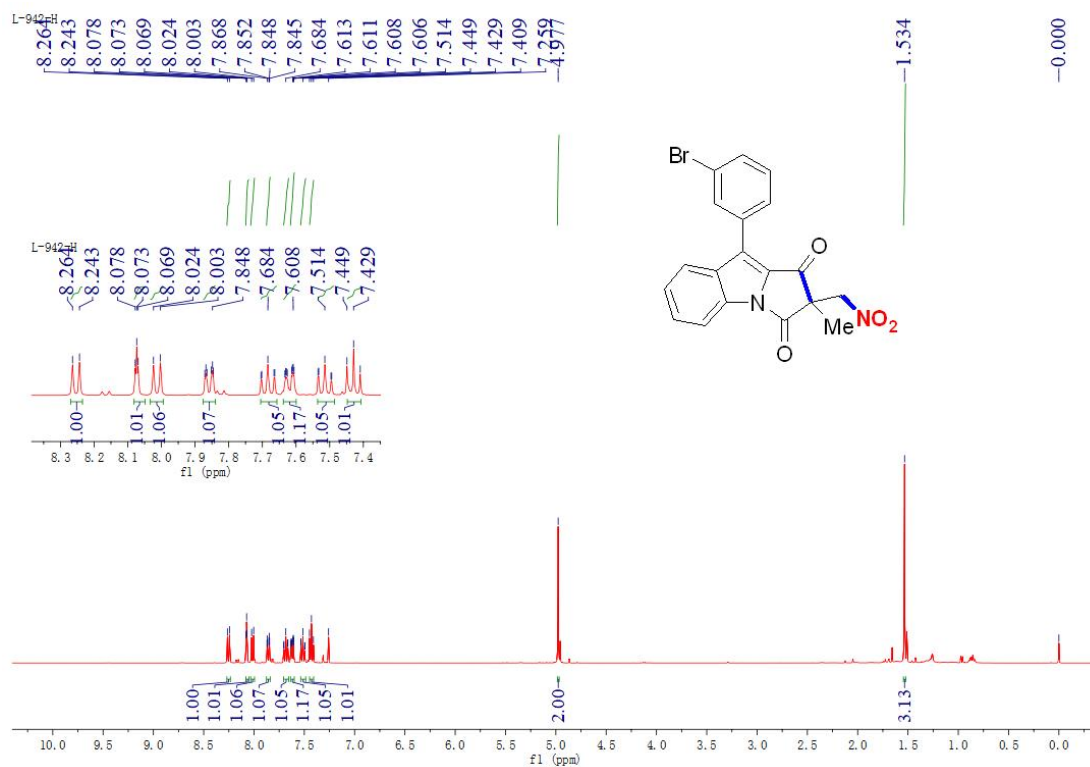

7-<sup>13</sup>C NMR (100 MHz, CDCl<sub>3</sub>)

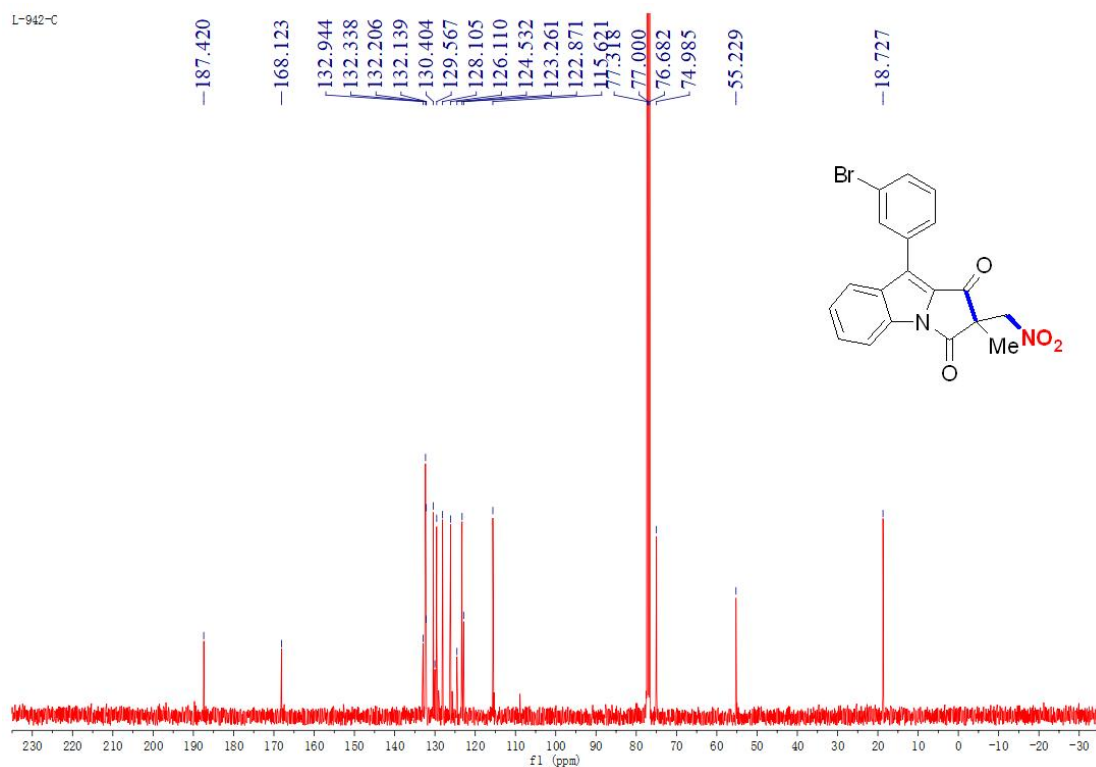

8-<sup>1</sup>H NMR (400 MHz, CDCl<sub>3</sub>)

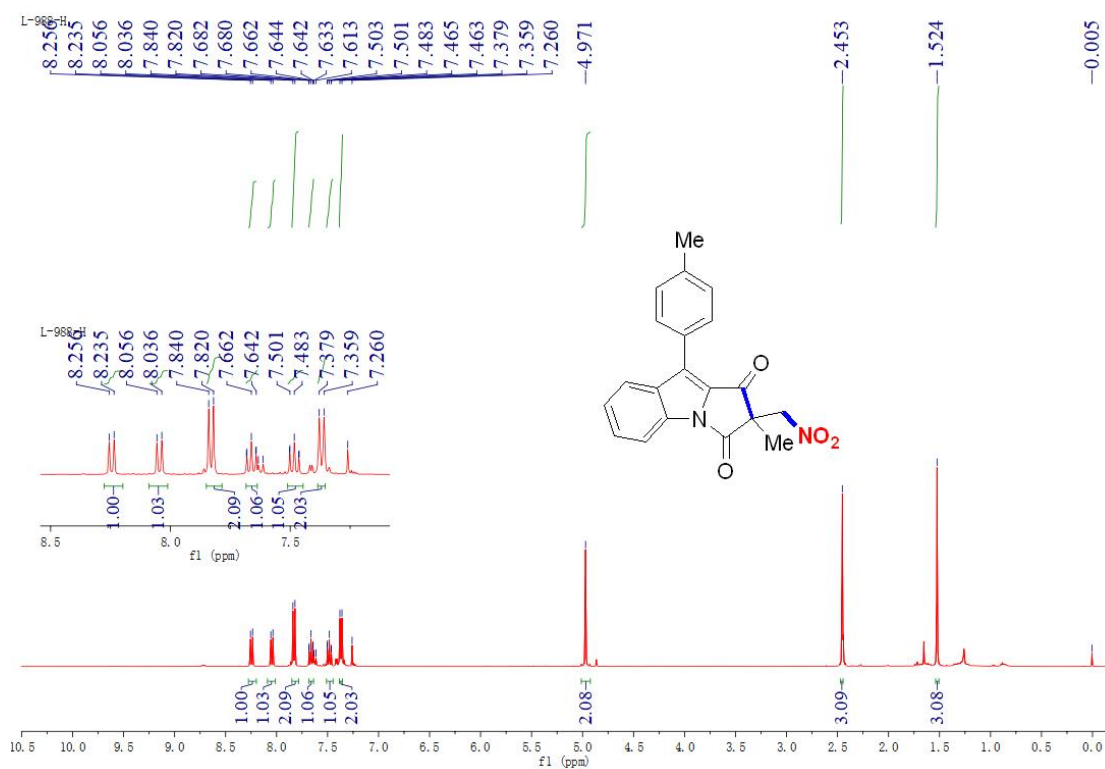

### 8-<sup>13</sup>C NMR (100 MHz, CDCl<sub>3</sub>)

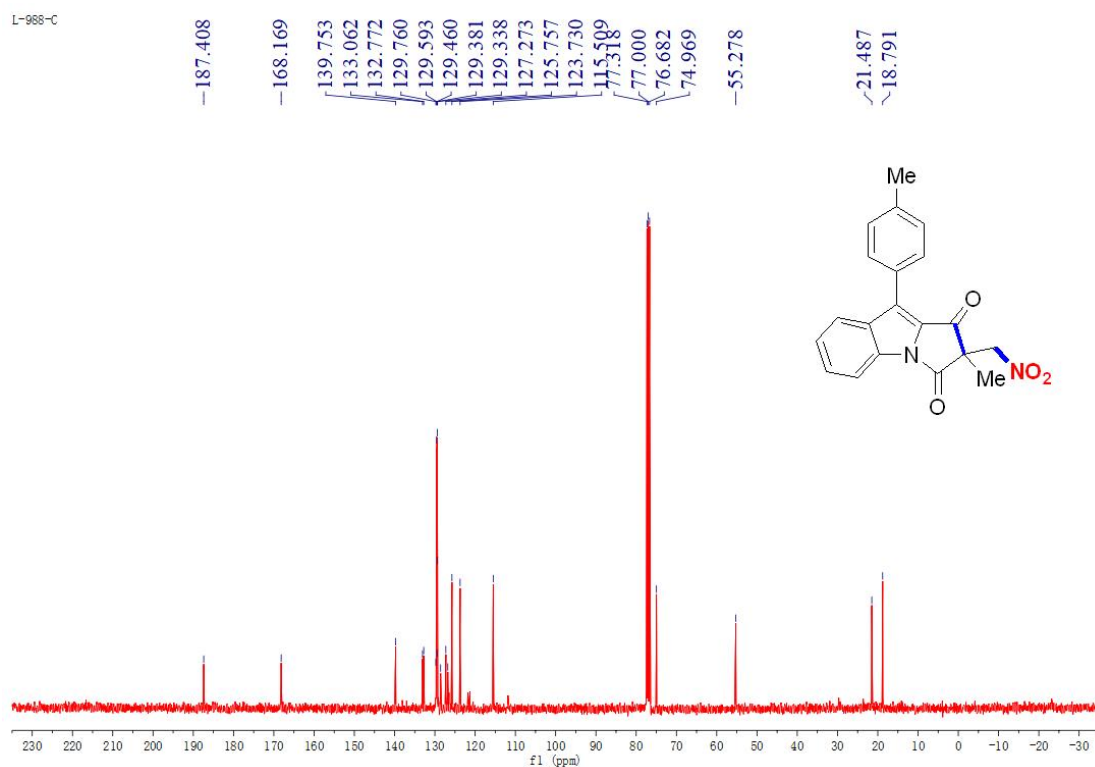

### 9-<sup>1</sup>H NMR (400 MHz, CDCl<sub>3</sub>)

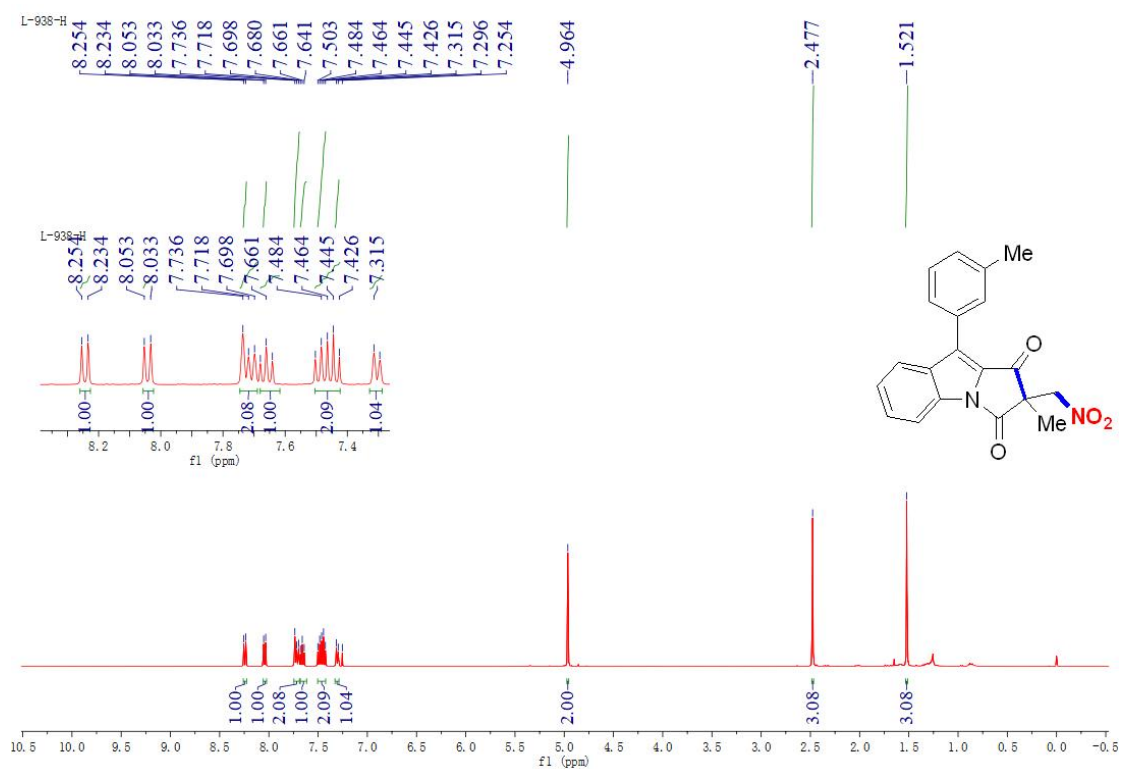

**9-<sup>13</sup>C NMR (100 MHz, CDCl<sub>3</sub>)**

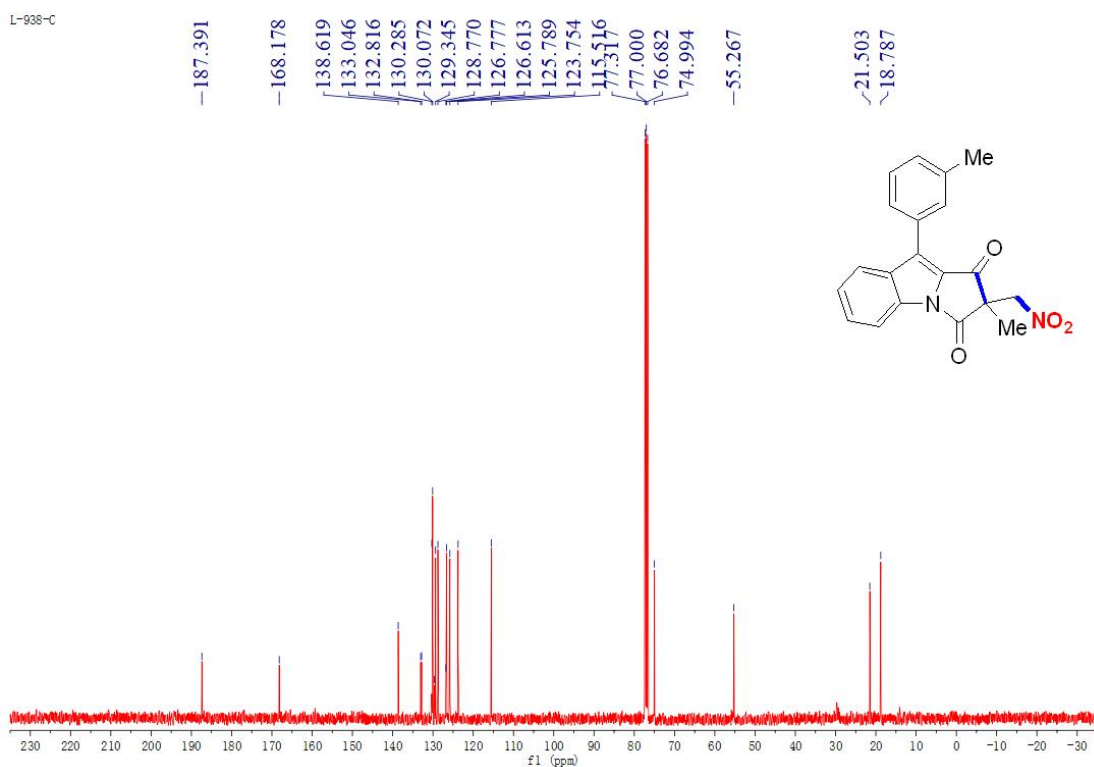

**10-<sup>1</sup>H NMR (400 MHz, CDCl<sub>3</sub>)**

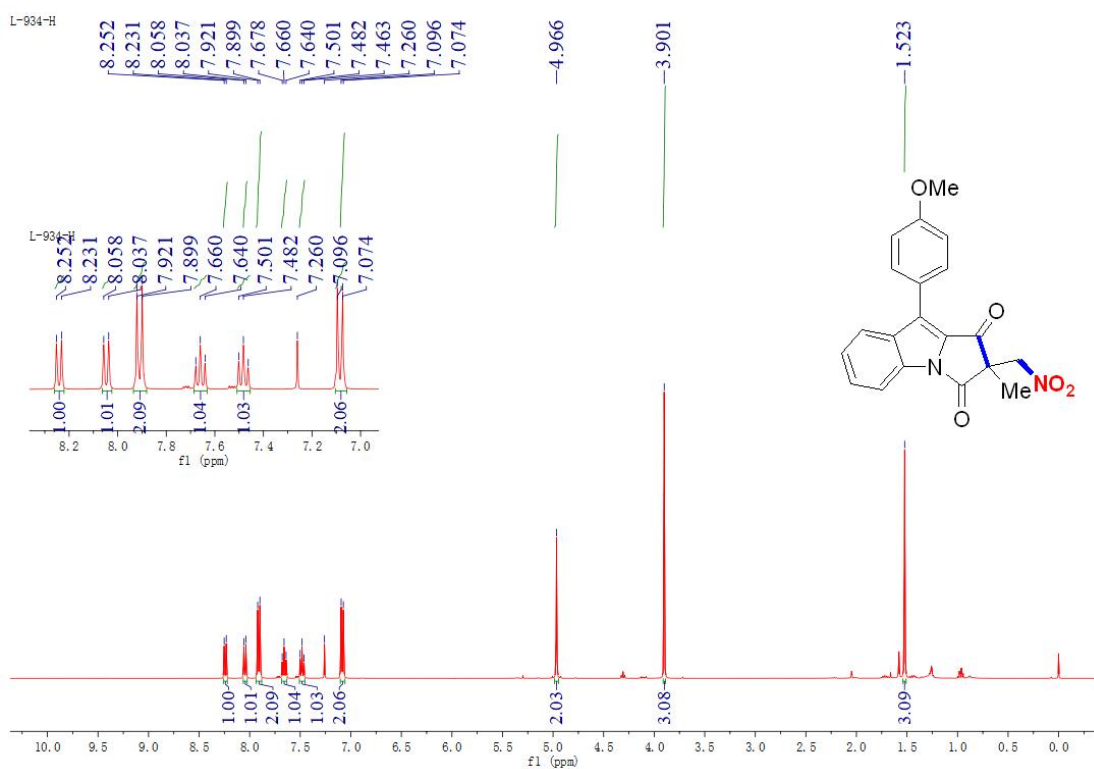



### 10-<sup>13</sup>C NMR (100 MHz, CDCl<sub>3</sub>)

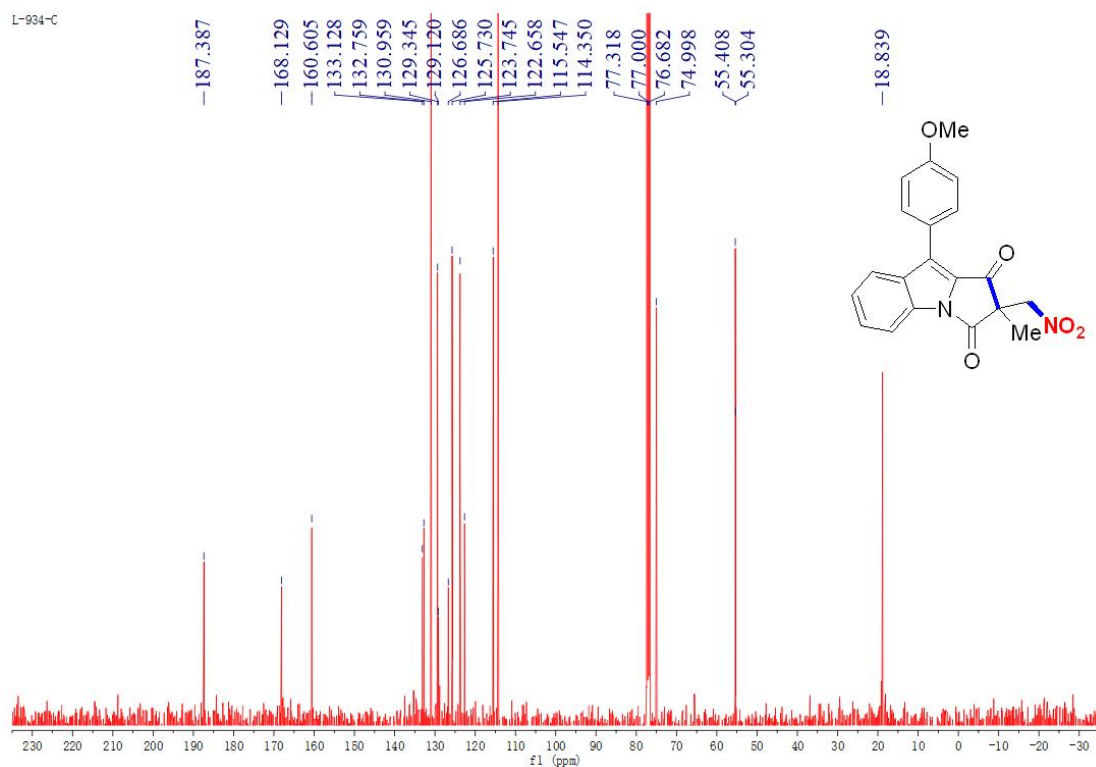

### 11-<sup>1</sup>H NMR (400 MHz, CDCl<sub>3</sub>)

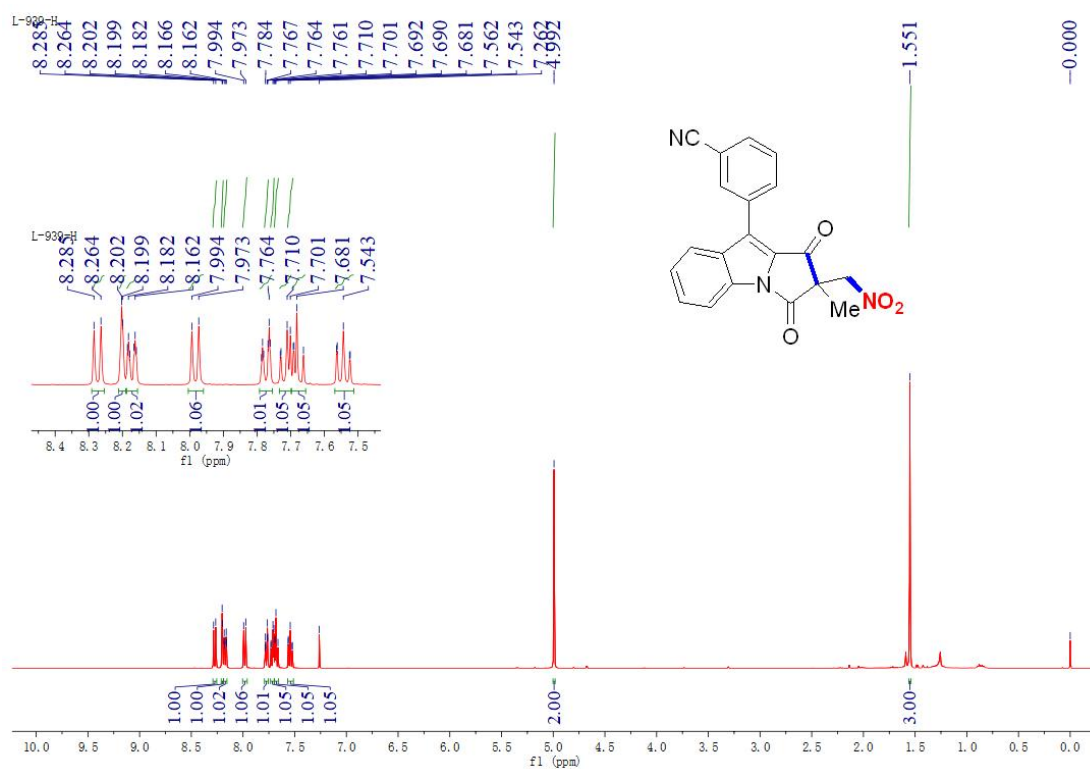

### 11-<sup>13</sup>C NMR (100 MHz, CDCl<sub>3</sub>)

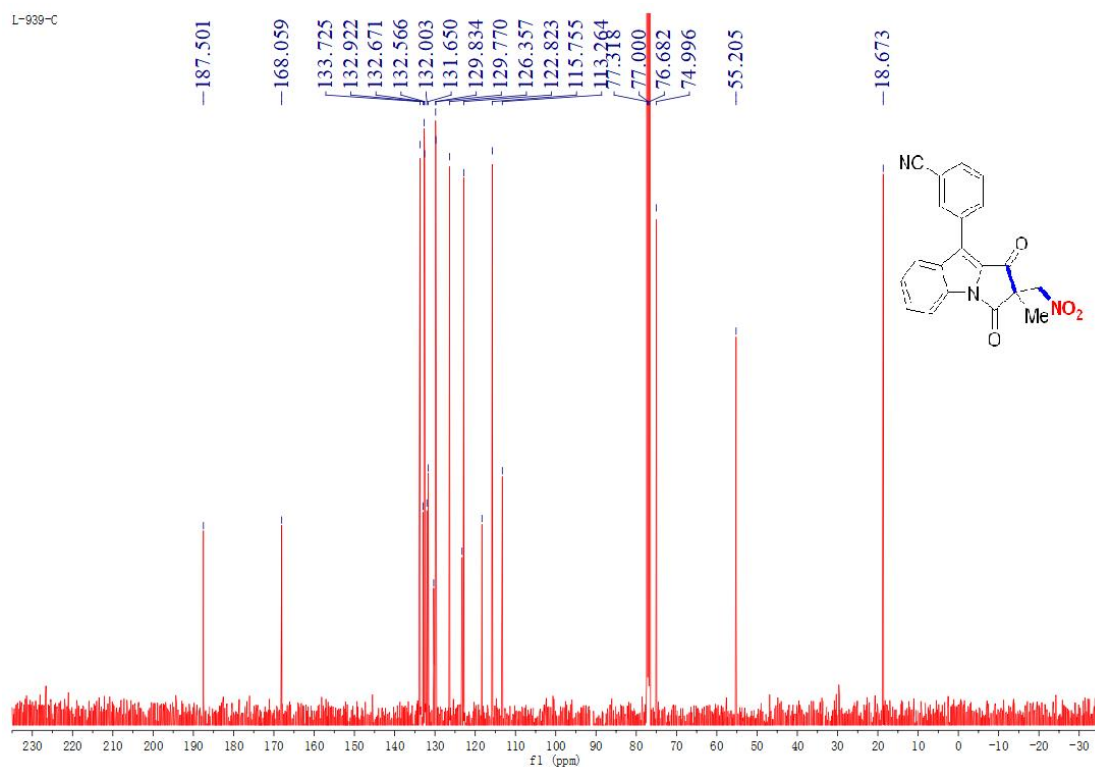

### 12-<sup>1</sup>H NMR (400 MHz, CDCl<sub>3</sub>)

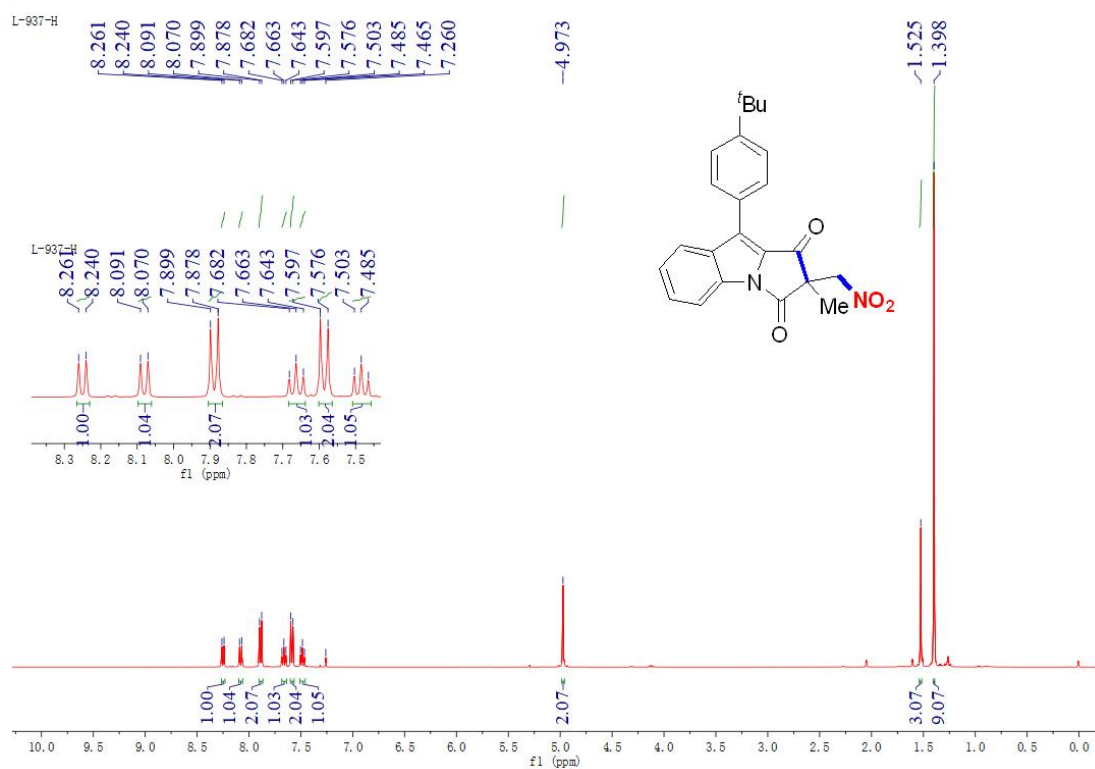

### 12-<sup>13</sup>C NMR (100 MHz, CDCl<sub>3</sub>)

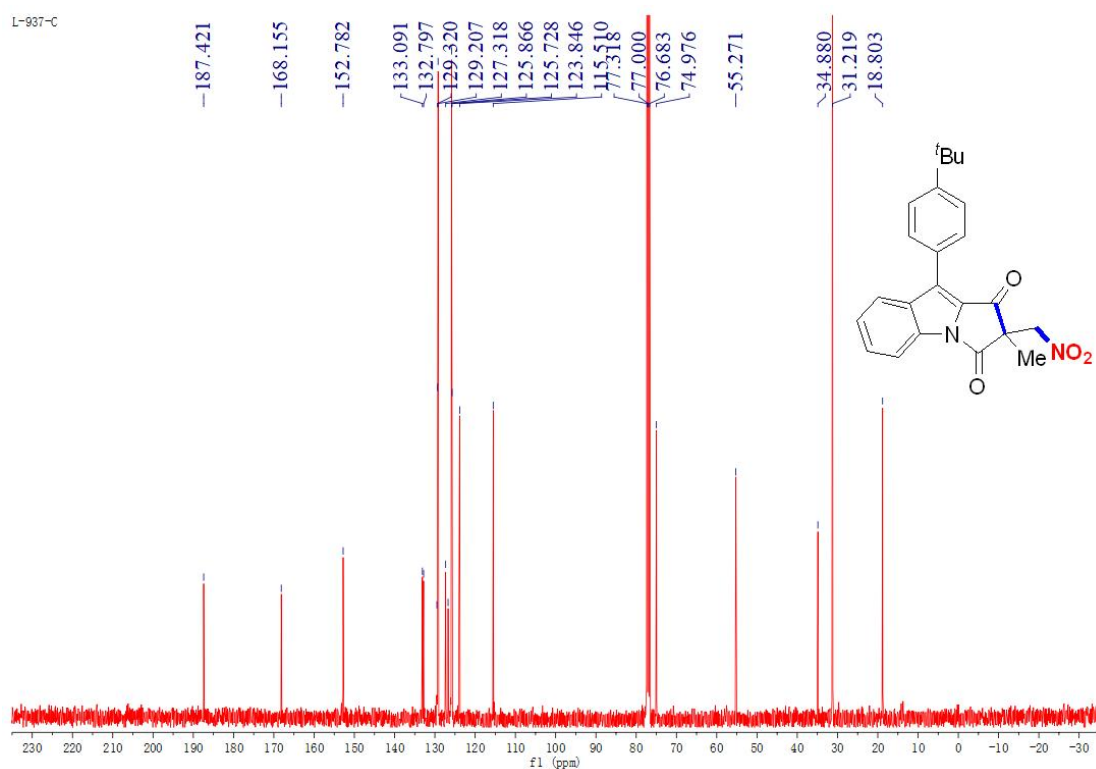

### 13-<sup>1</sup>H NMR (400 MHz, CDCl<sub>3</sub>)

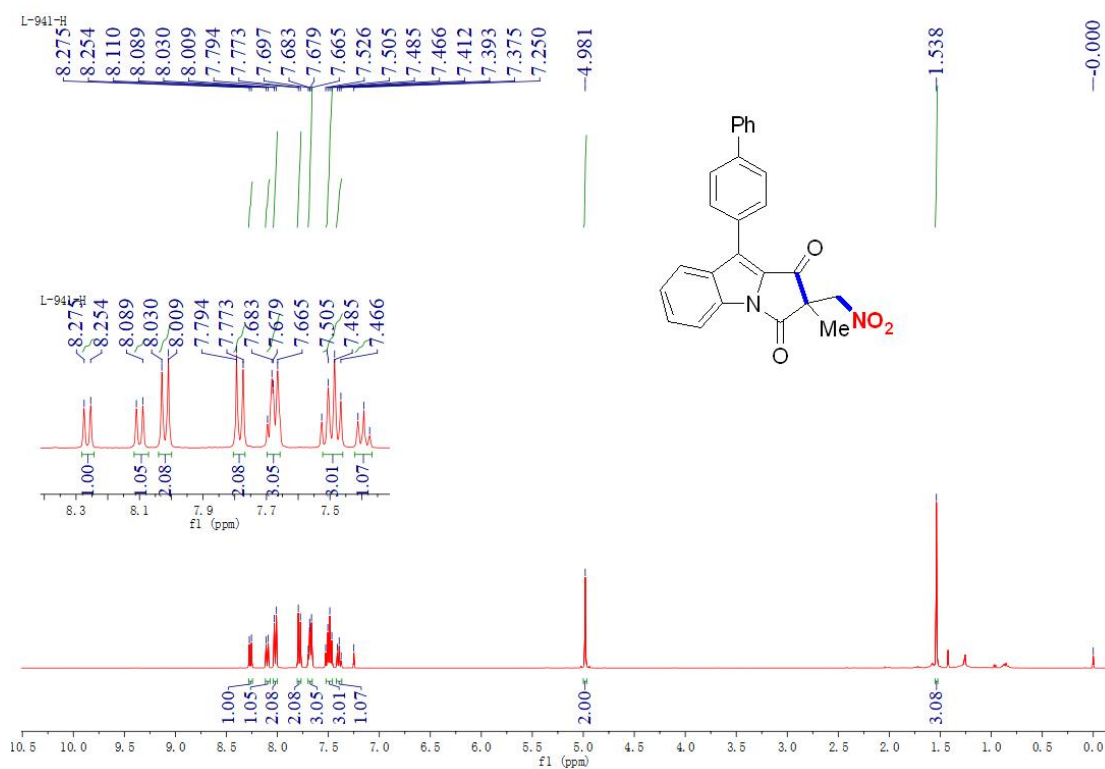

### 13-<sup>13</sup>C NMR (100 MHz, CDCl<sub>3</sub>)

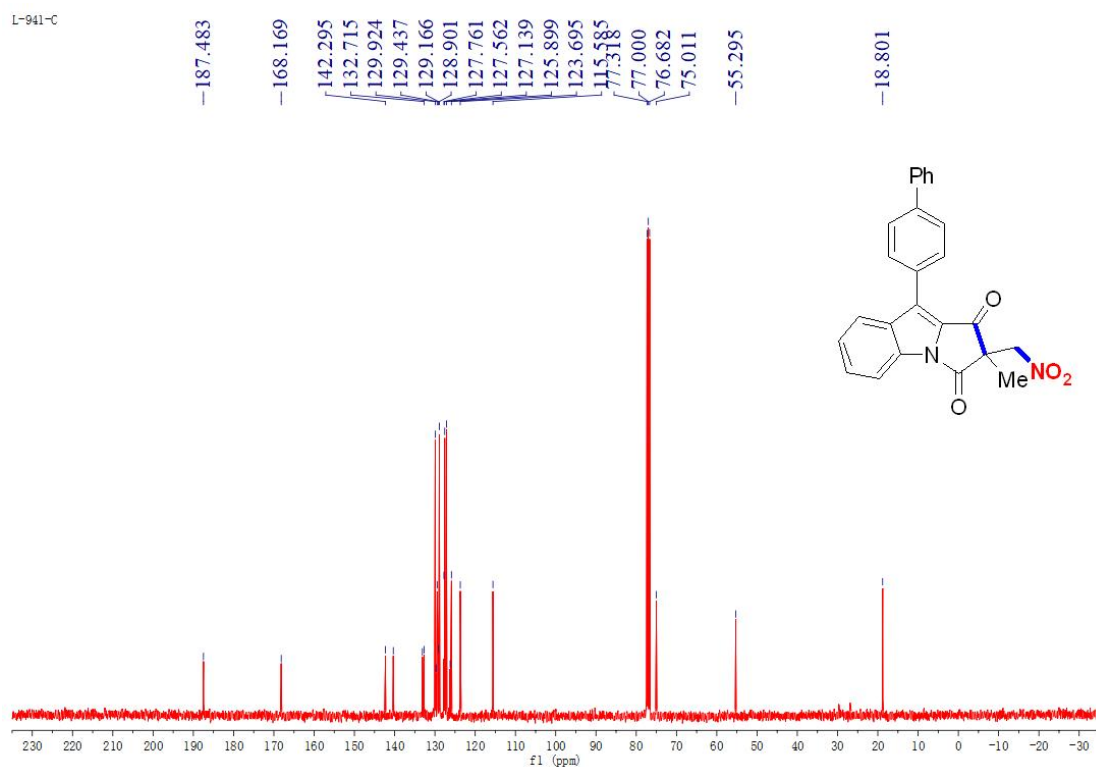

### 14-<sup>1</sup>H NMR (400 MHz, CDCl<sub>3</sub>)

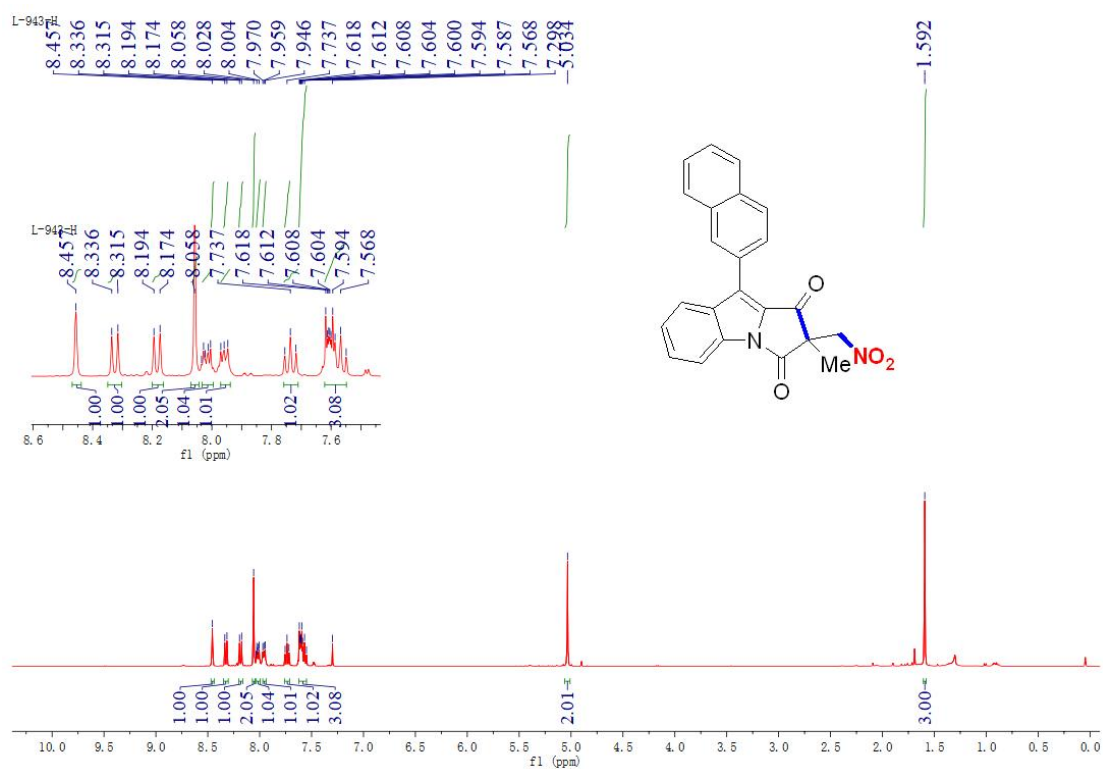

### 14-<sup>13</sup>C NMR (100 MHz, CDCl<sub>3</sub>)

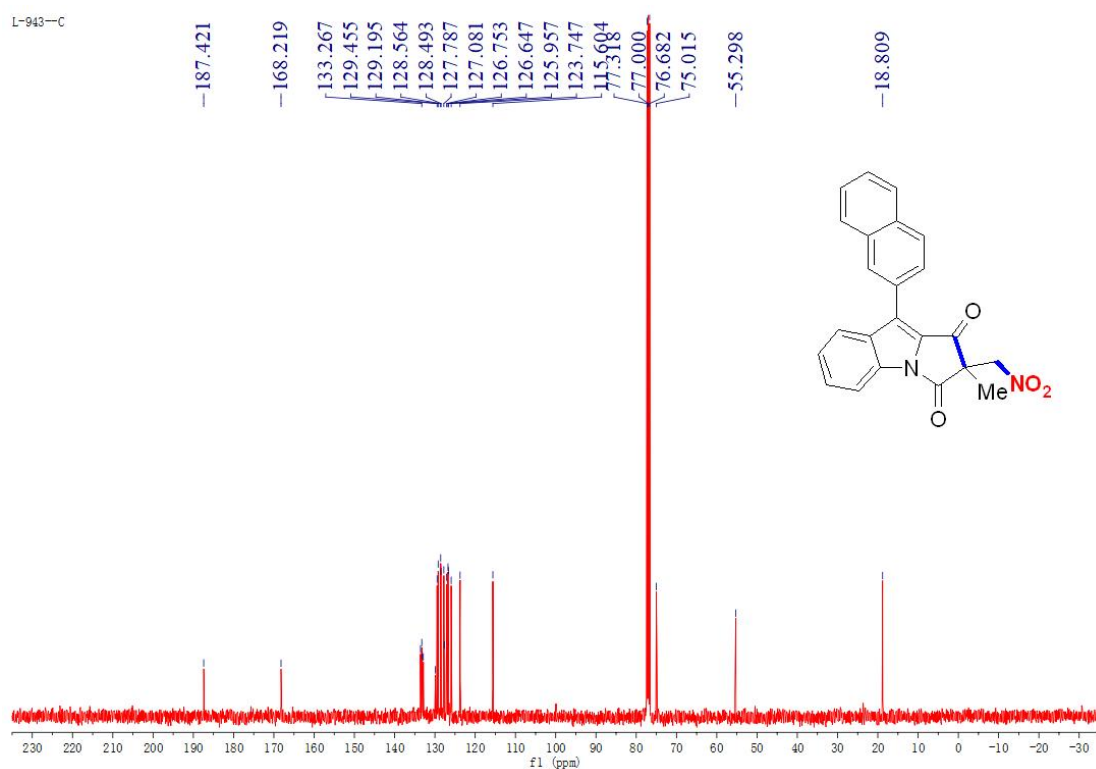

### 15-<sup>1</sup>H NMR (400 MHz, CDCl<sub>3</sub>)

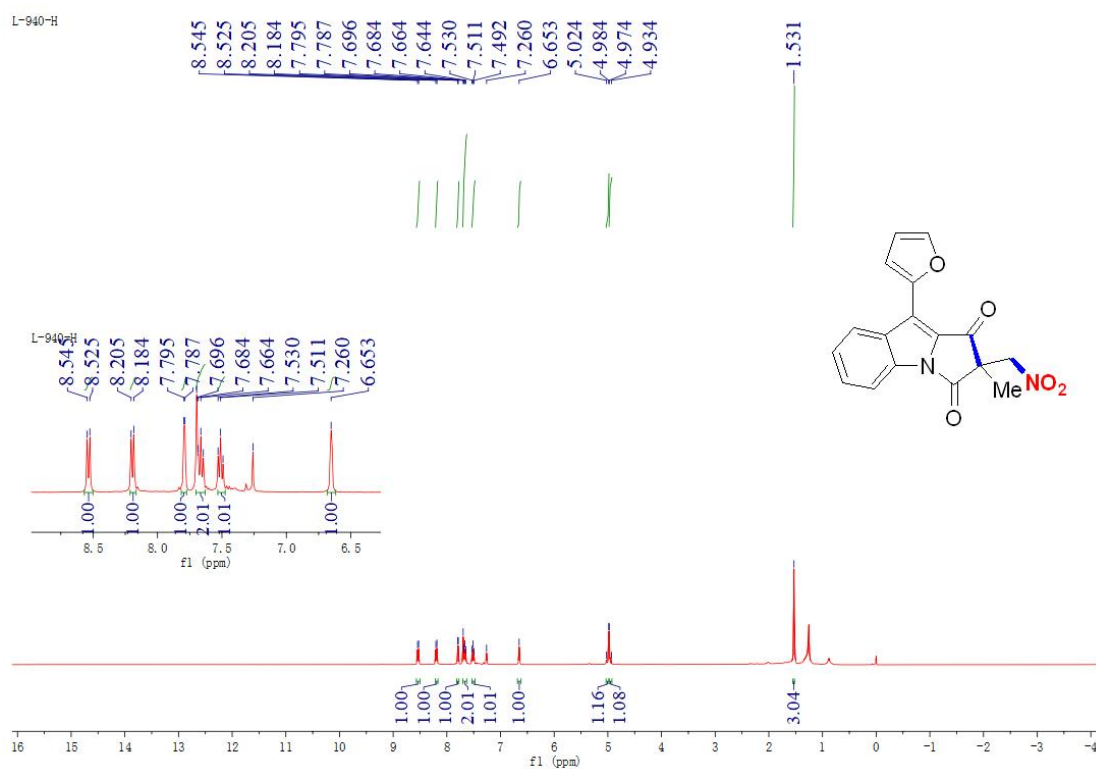

### 15-<sup>13</sup>C NMR (100 MHz, CDCl<sub>3</sub>)

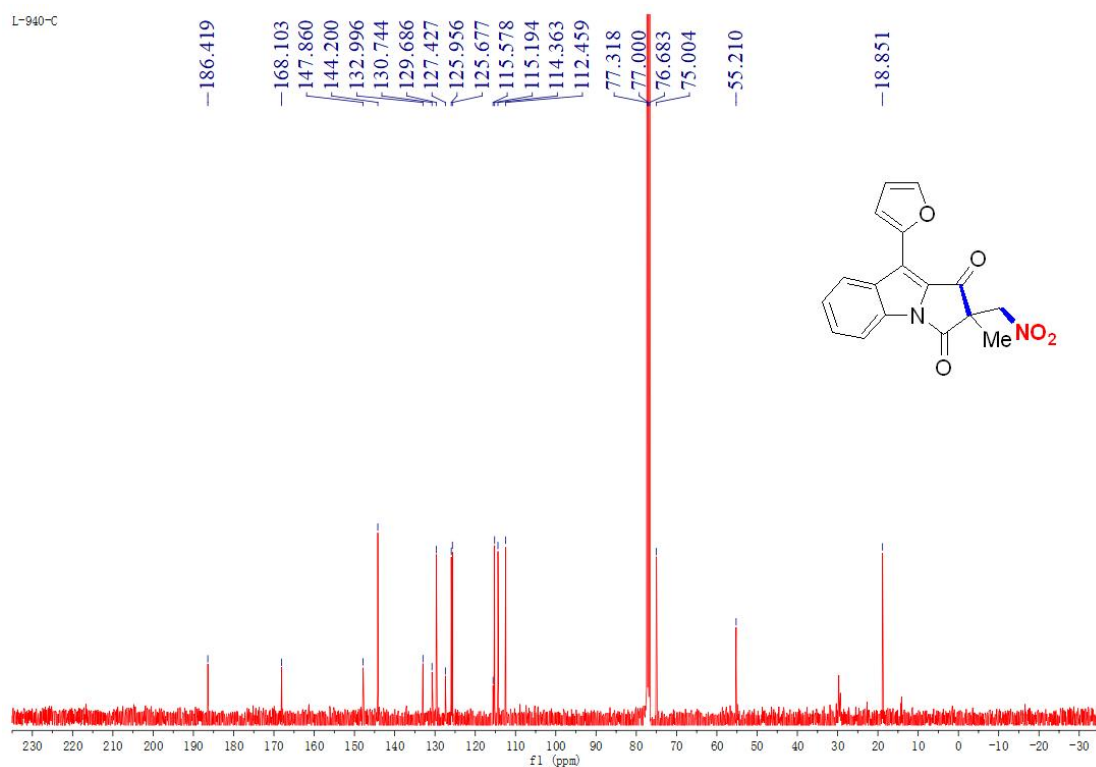

### 16-<sup>1</sup>H NMR (400 MHz, CDCl<sub>3</sub>)

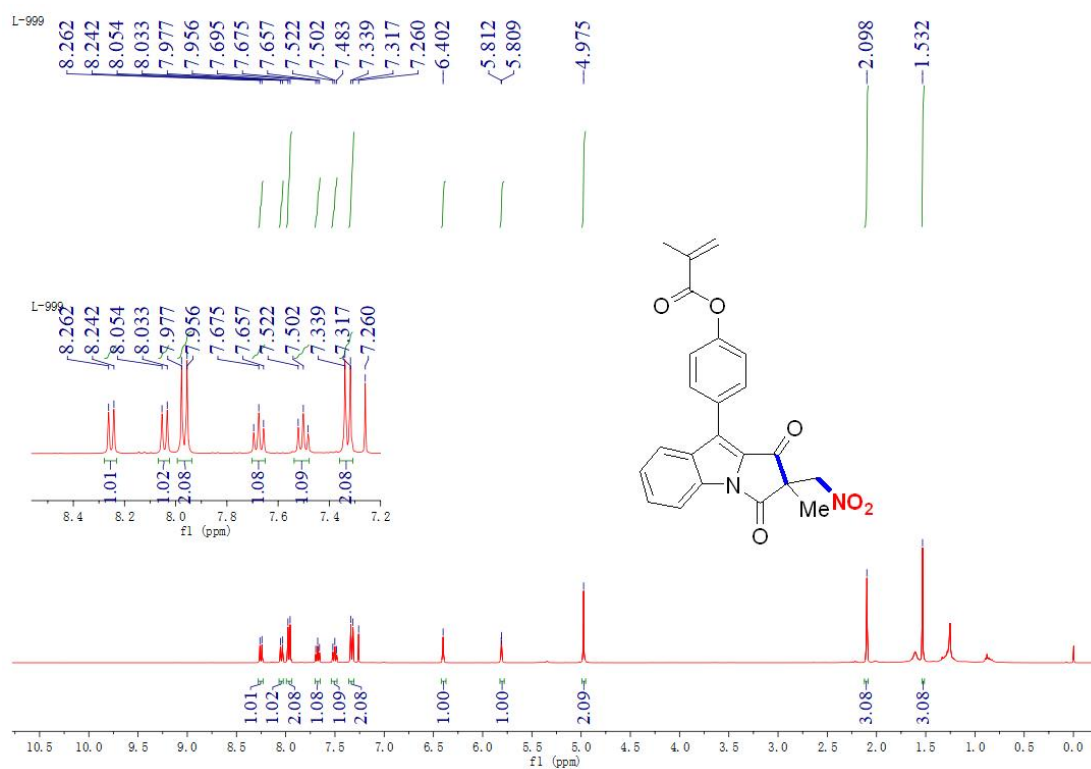

### 16-<sup>13</sup>C NMR (100 MHz, CDCl<sub>3</sub>)

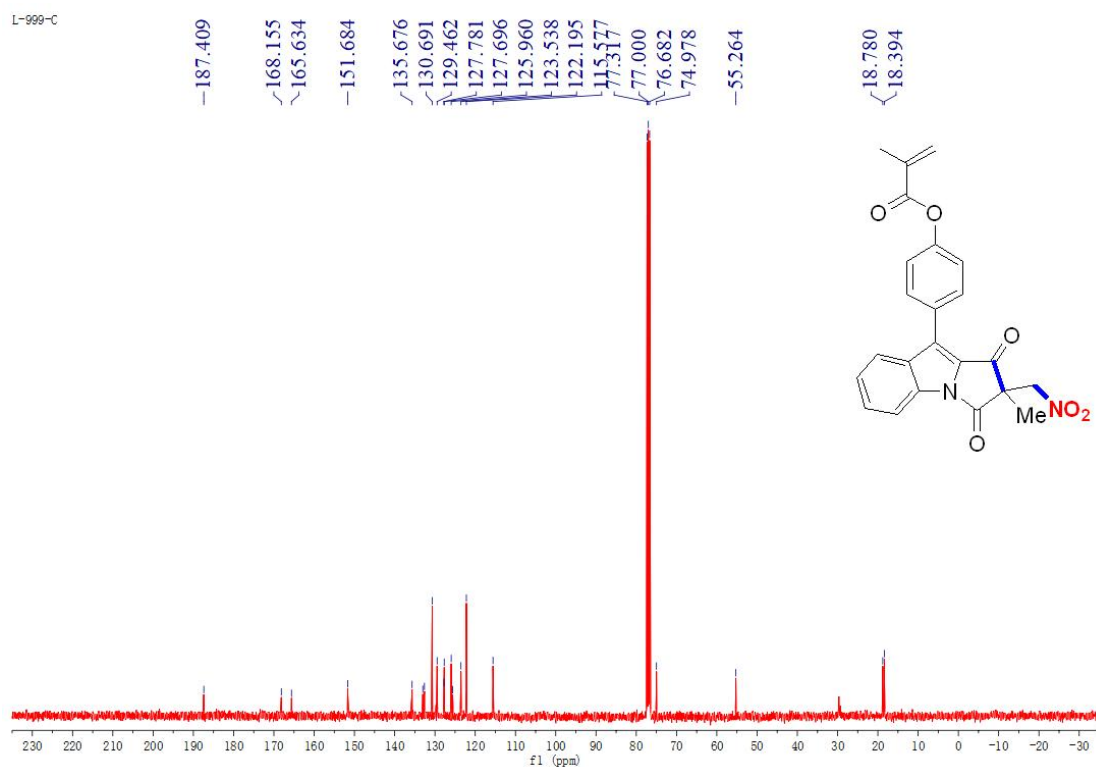

### 17-<sup>1</sup>H NMR (600 MHz, CDCl<sub>3</sub>)

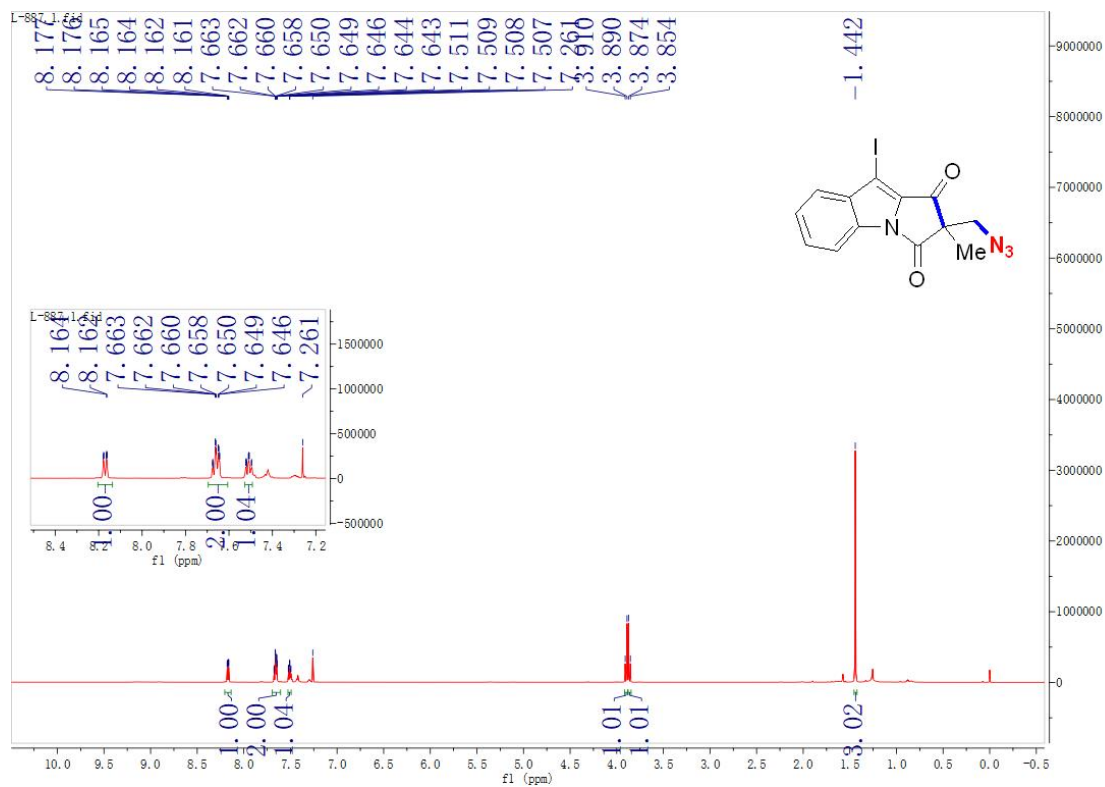

### 17-<sup>13</sup>C NMR (150 MHz, CDCl<sub>3</sub>)

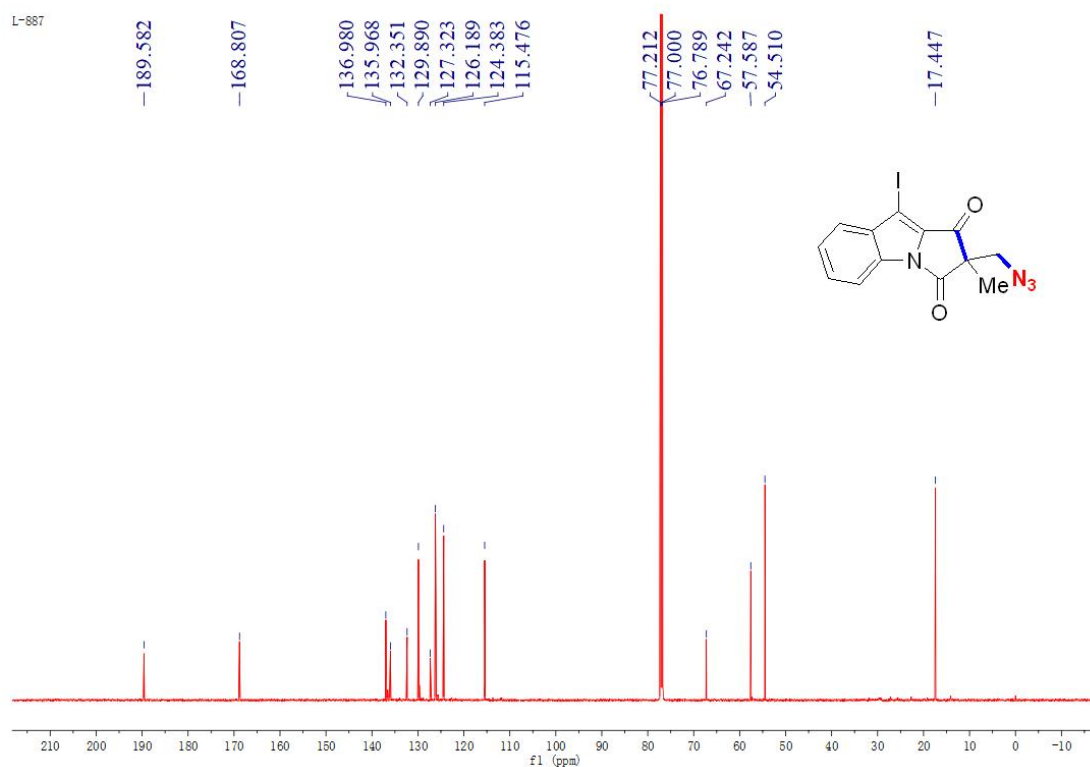

### 18-<sup>1</sup>H NMR (400 MHz, CDCl<sub>3</sub>)

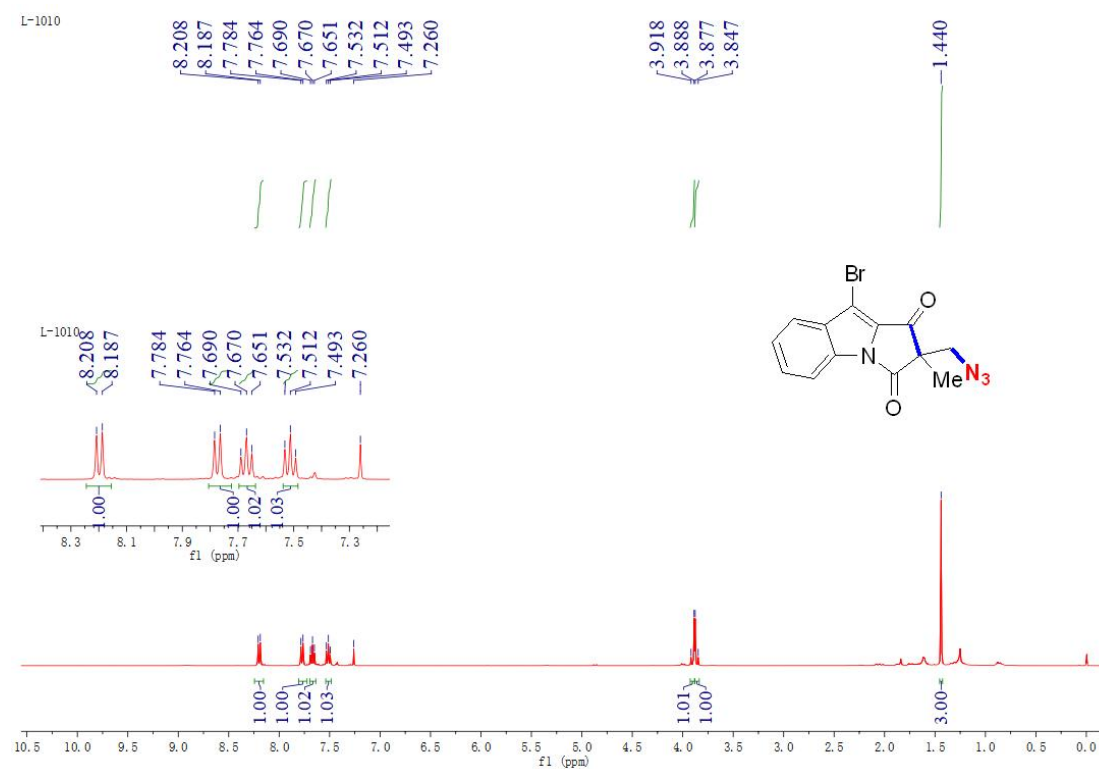



### 18-<sup>13</sup>C NMR (100 MHz, CDCl<sub>3</sub>)

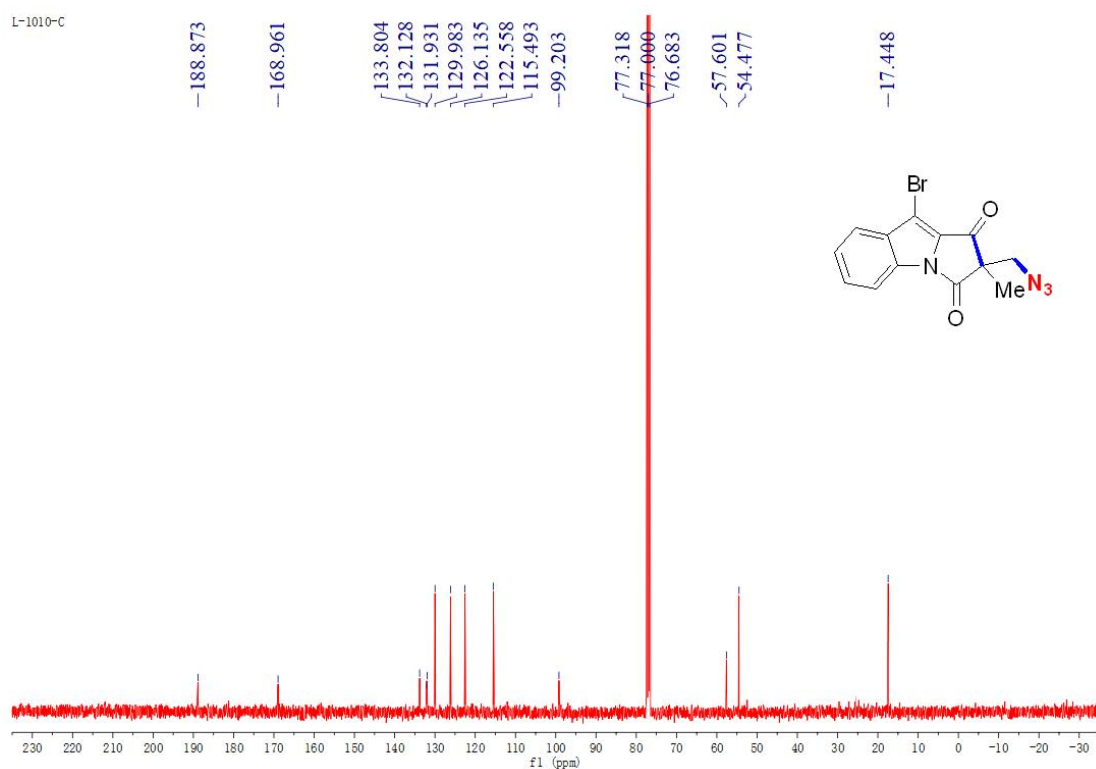

### 19-<sup>1</sup>H NMR (400 MHz, CDCl<sub>3</sub>)

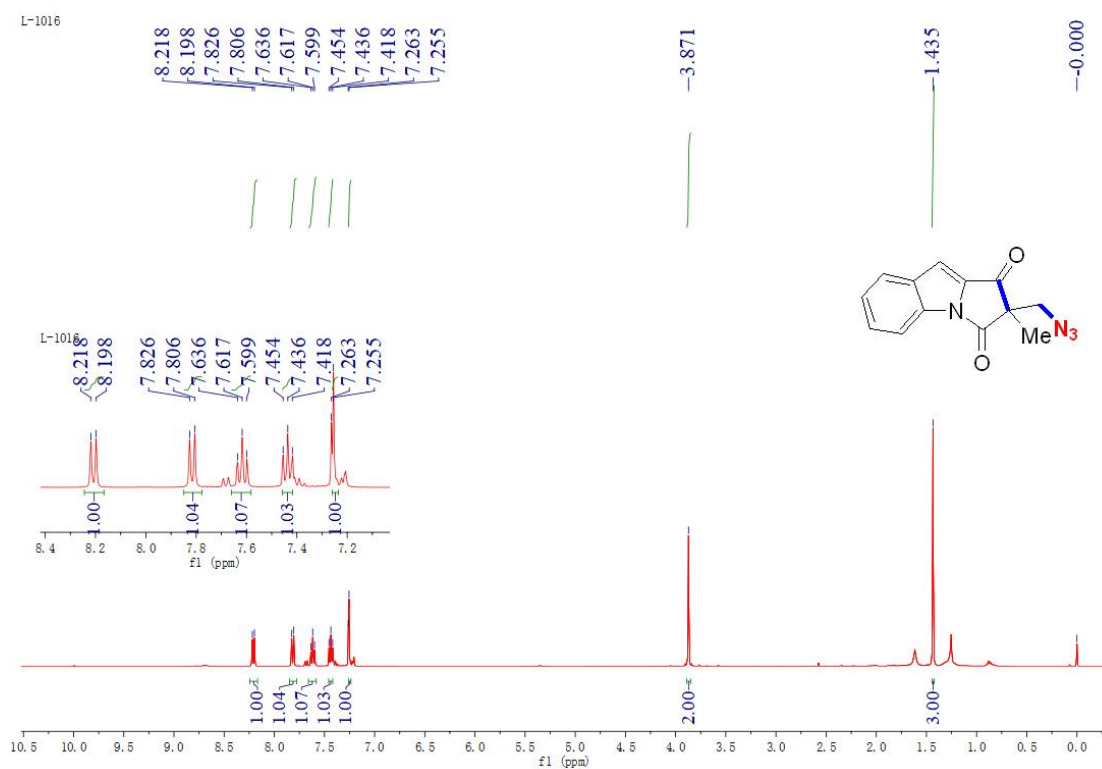

### 19-<sup>13</sup>C NMR (100 MHz, CDCl<sub>3</sub>)

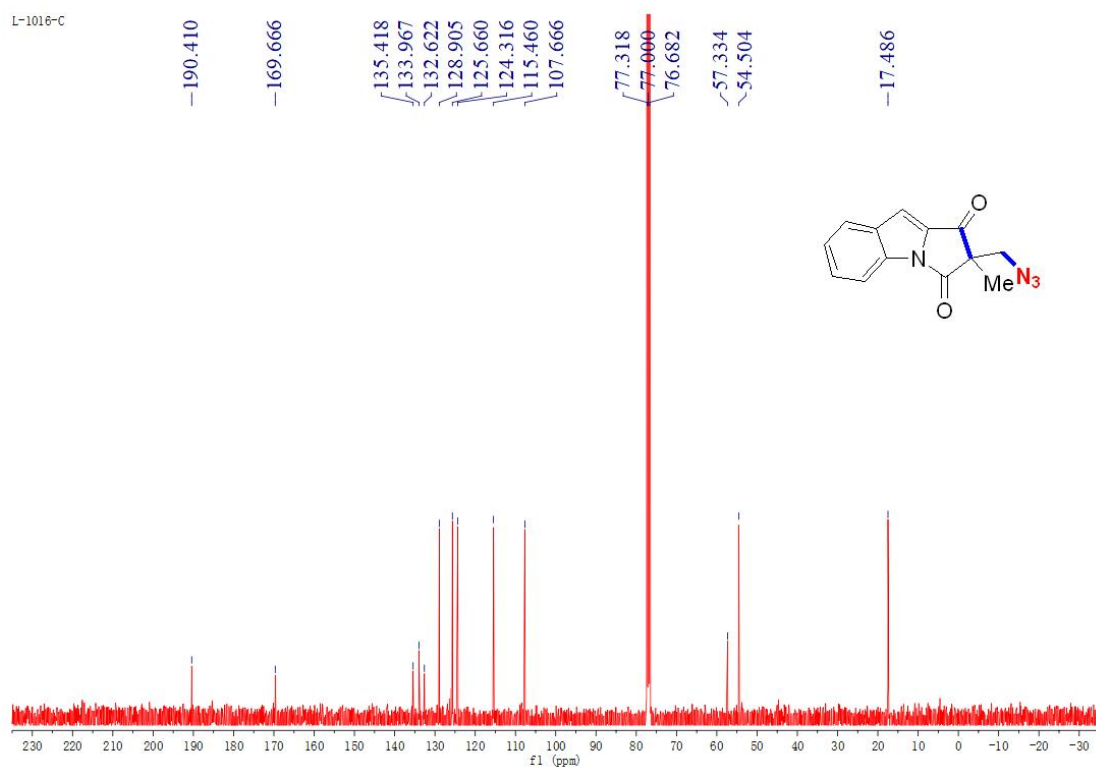

### 20-<sup>1</sup>H NMR (400 MHz, CDCl<sub>3</sub>)

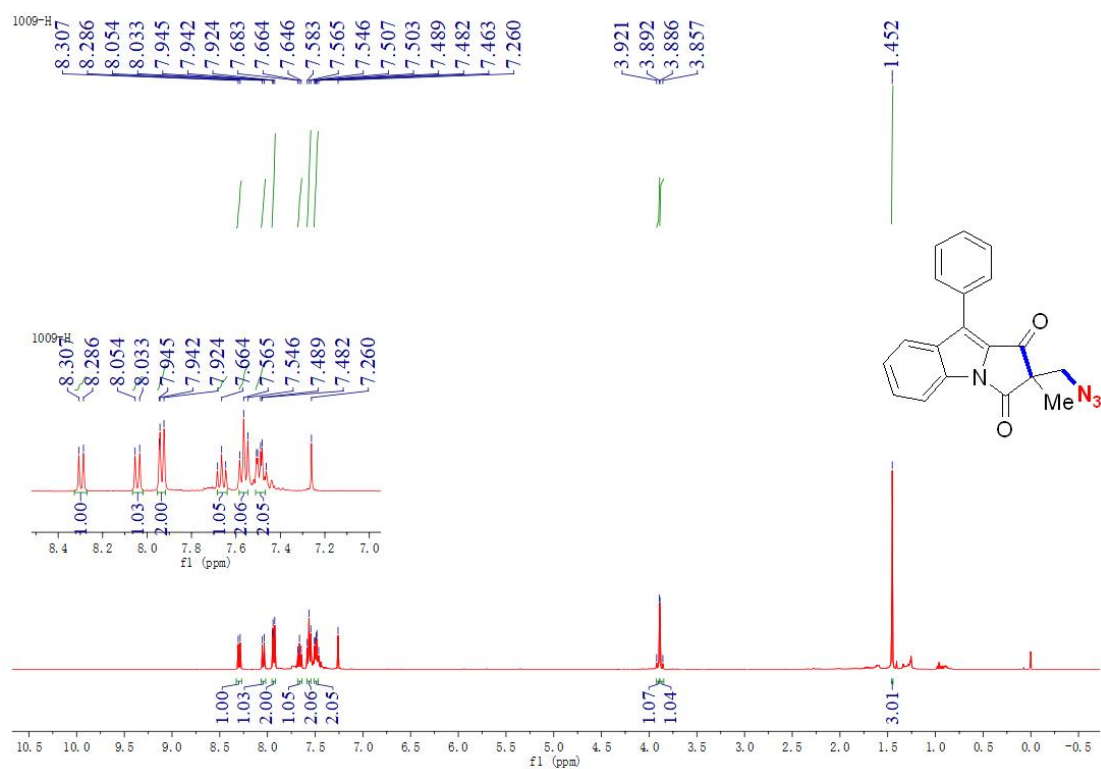

## 20-<sup>13</sup>C NMR (100 MHz, CDCl<sub>3</sub>)

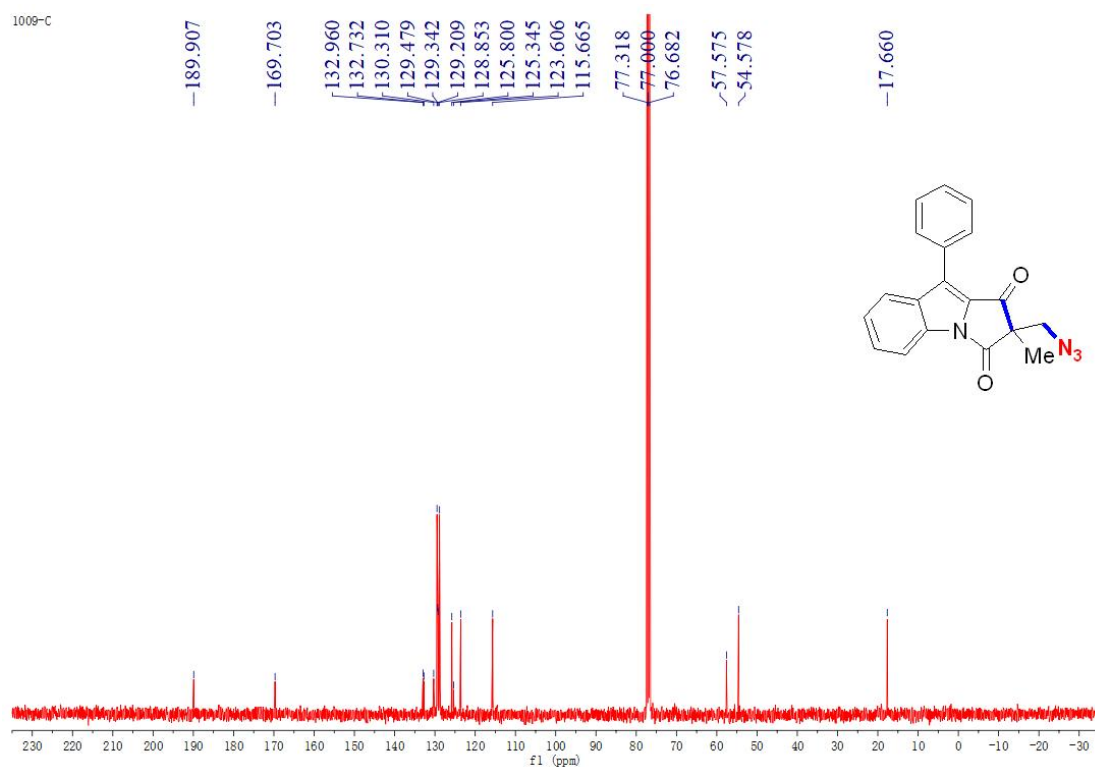

## 21-<sup>1</sup>H NMR (400 MHz, CDCl<sub>3</sub>)

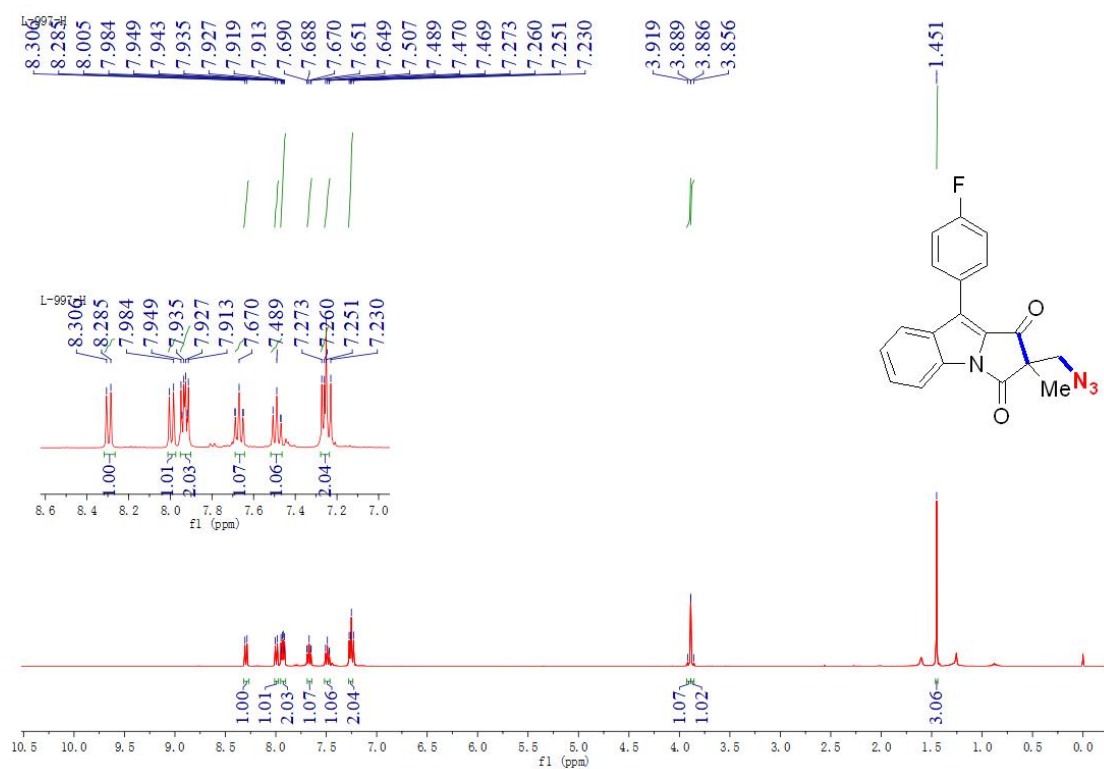

## 21-<sup>13</sup>C NMR (100 MHz, CDCl<sub>3</sub>)

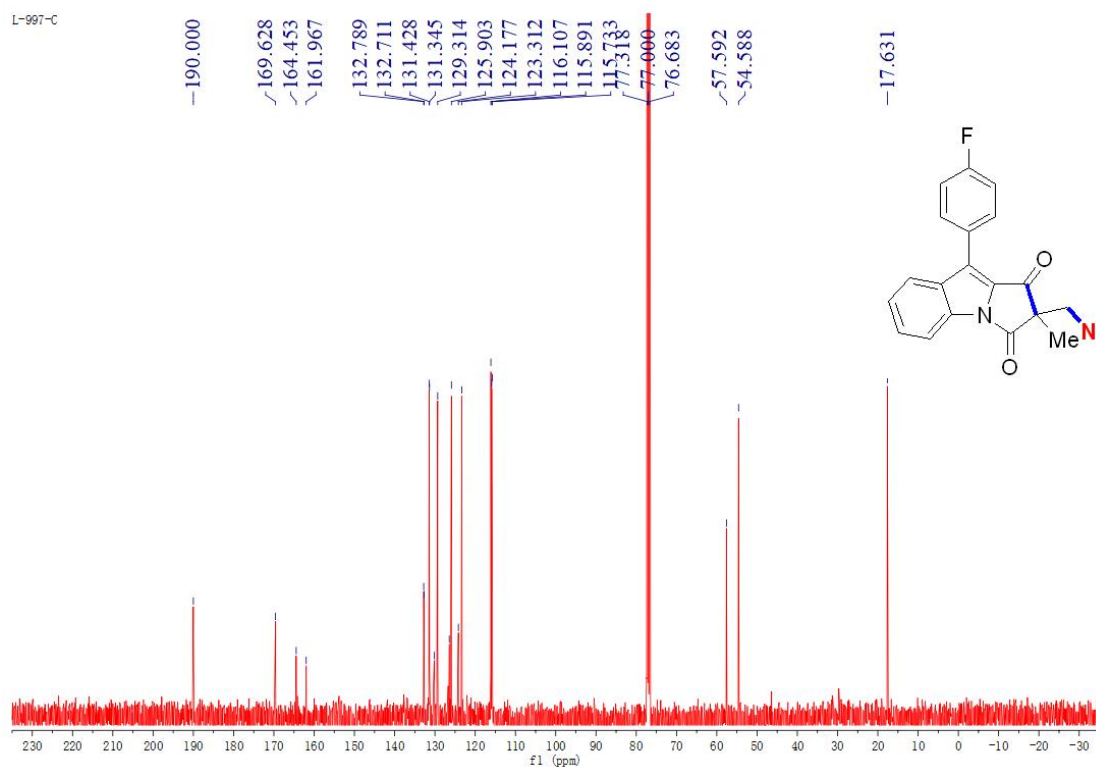

## 21-<sup>19</sup>F NMR (565 MHz, CDCl<sub>3</sub>)

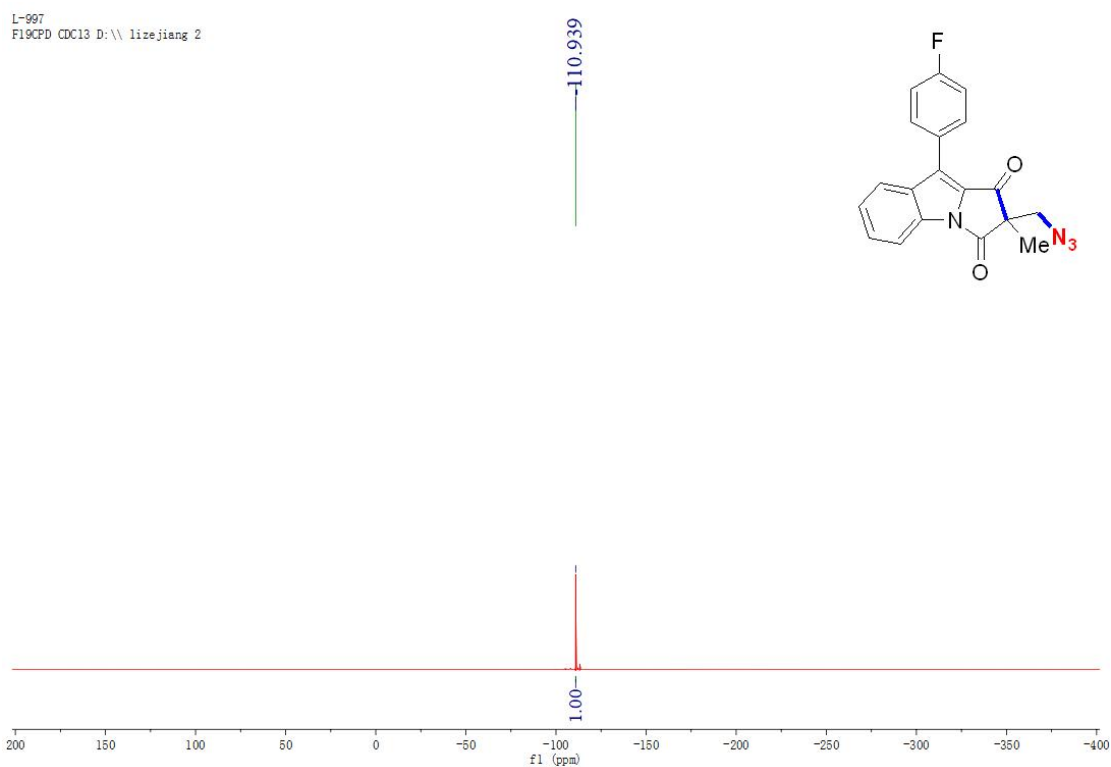

## 22-<sup>1</sup>H NMR (400 MHz, CDCl<sub>3</sub>)

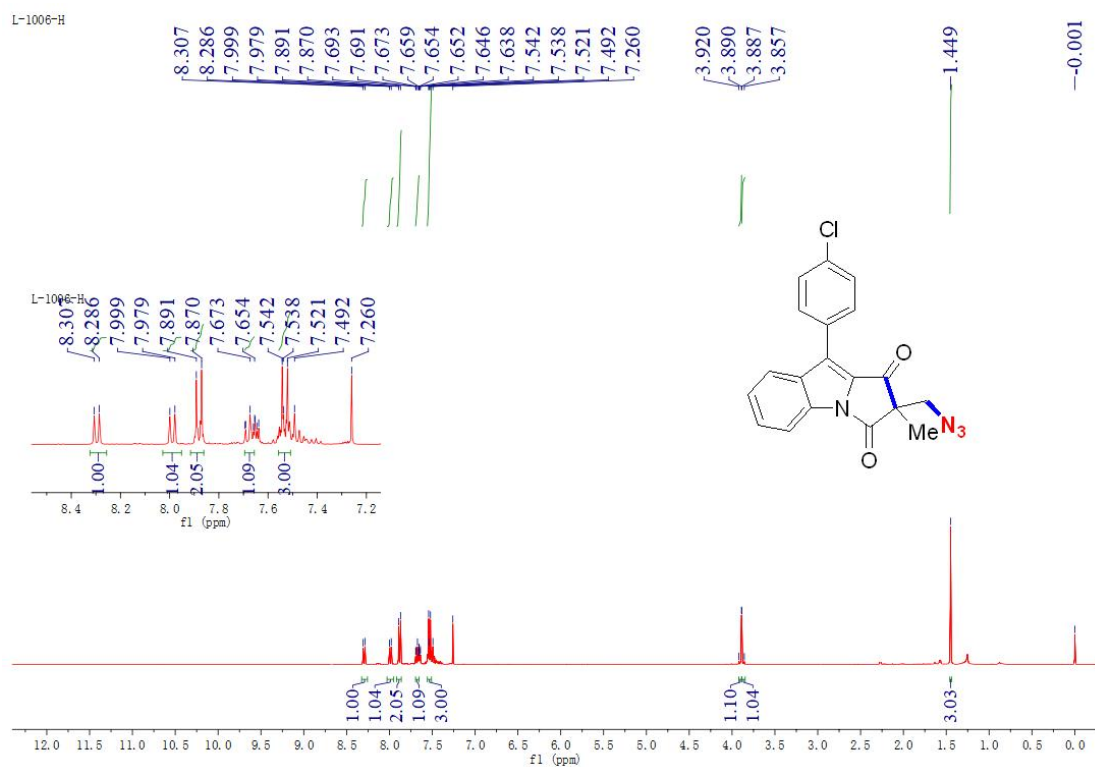

## 22-<sup>13</sup>C NMR (100 MHz, CDCl<sub>3</sub>)

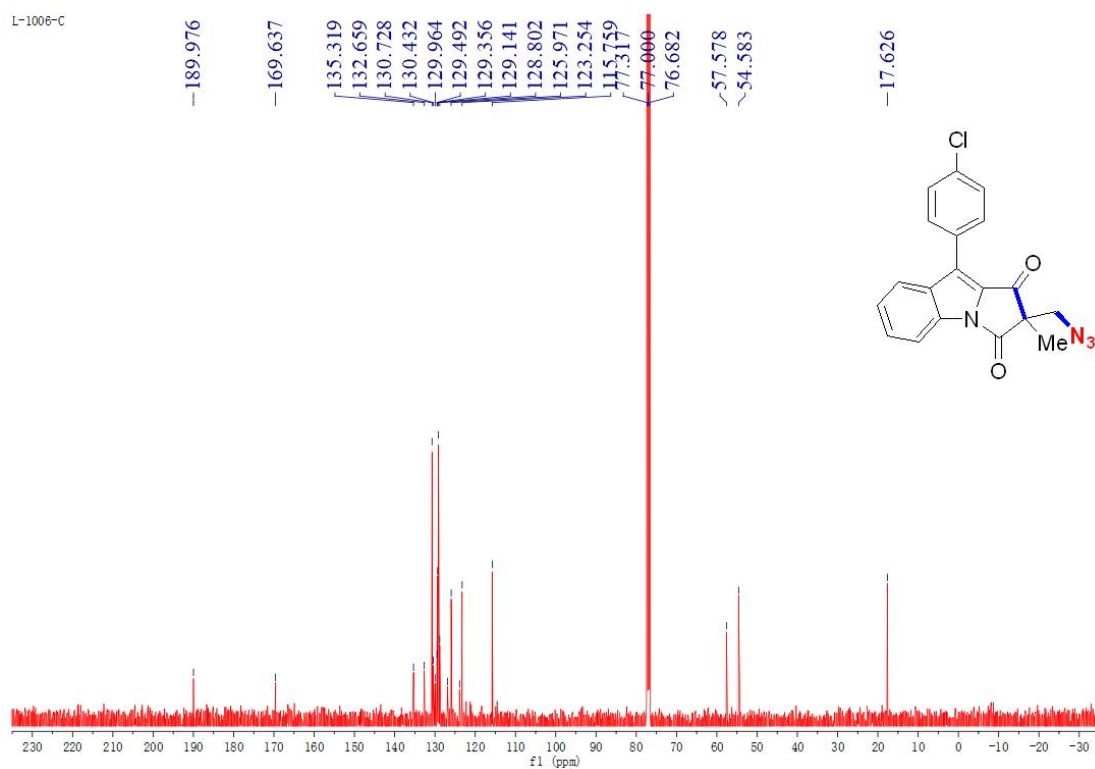

**23-<sup>1</sup>H NMR (400 MHz, CDCl<sub>3</sub>)**

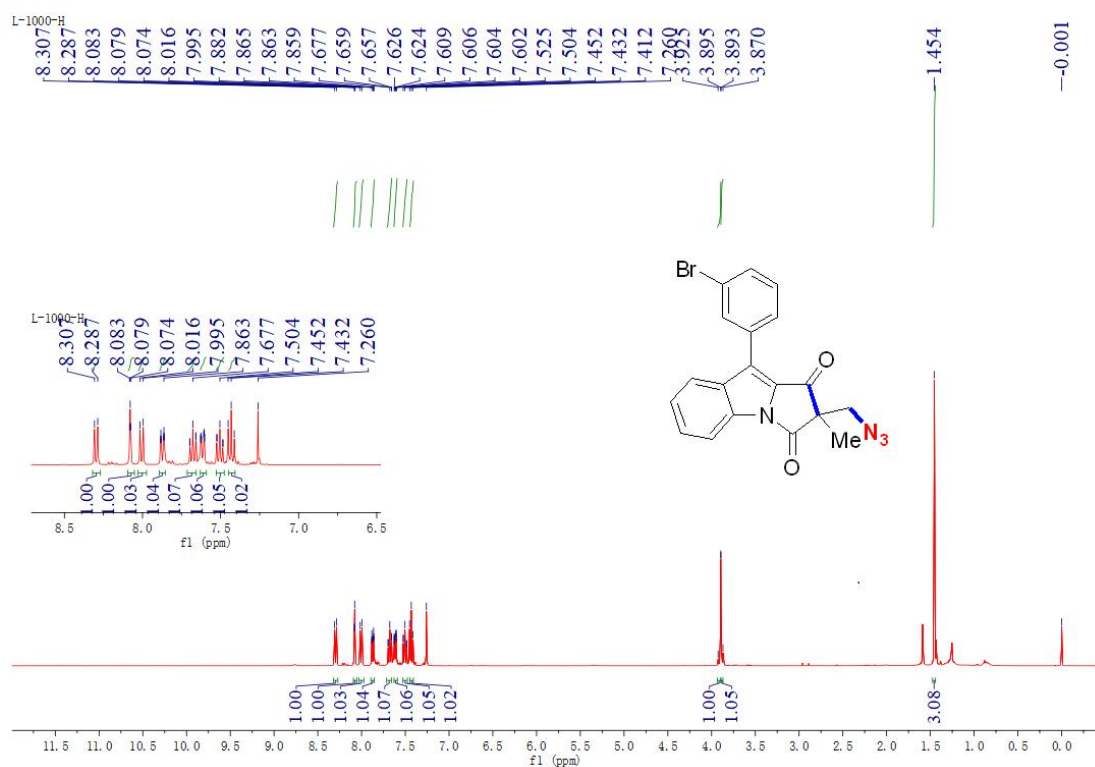

**23-<sup>13</sup>C NMR (100 MHz, CDCl<sub>3</sub>)**

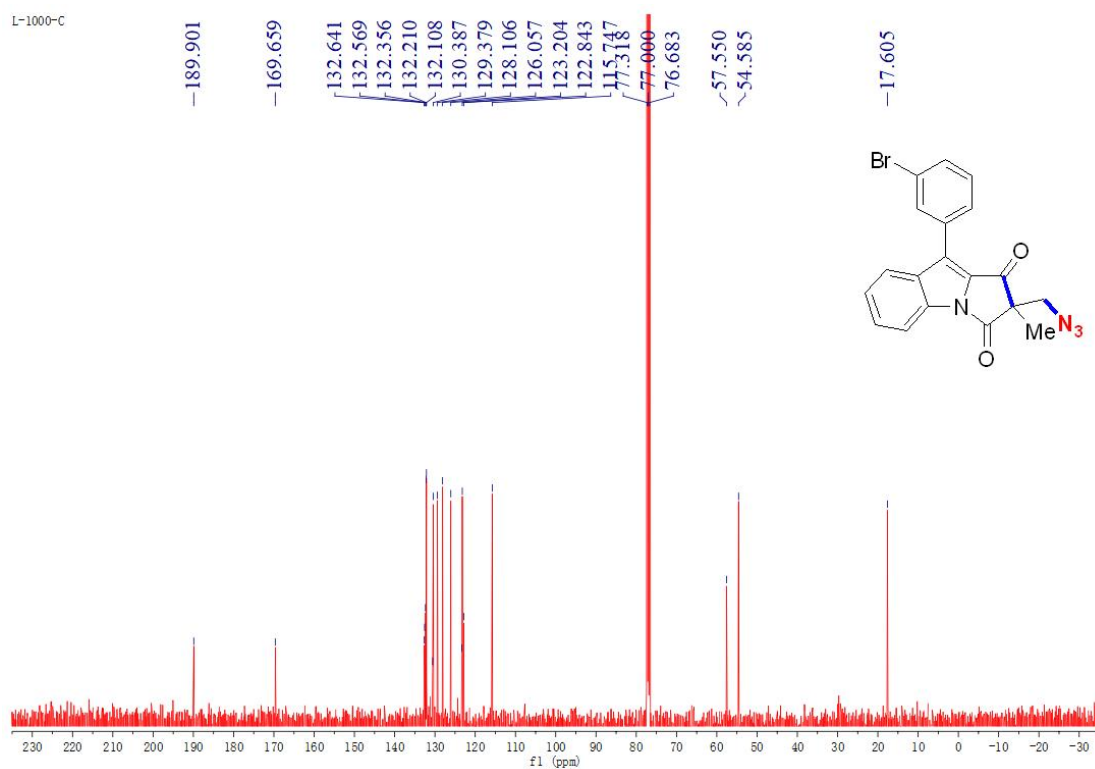

## 24-<sup>1</sup>H NMR (400 MHz, CDCl<sub>3</sub>)

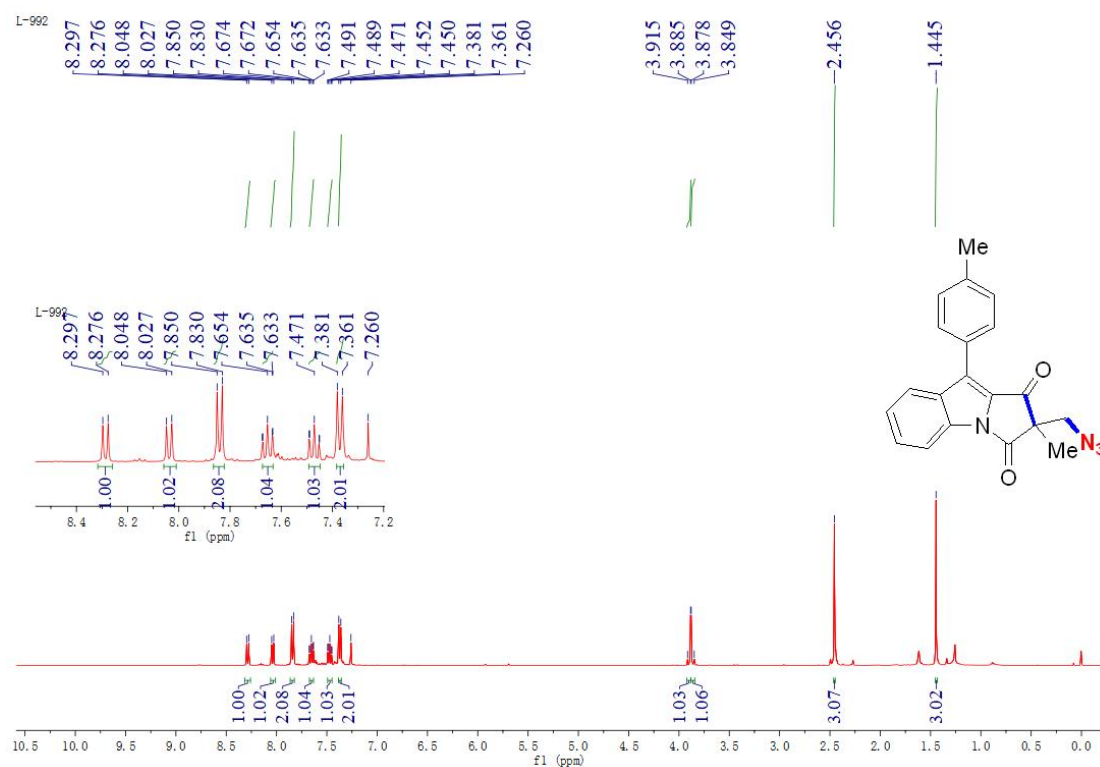

## 24-<sup>13</sup>C NMR (100 MHz, CDCl<sub>3</sub>)

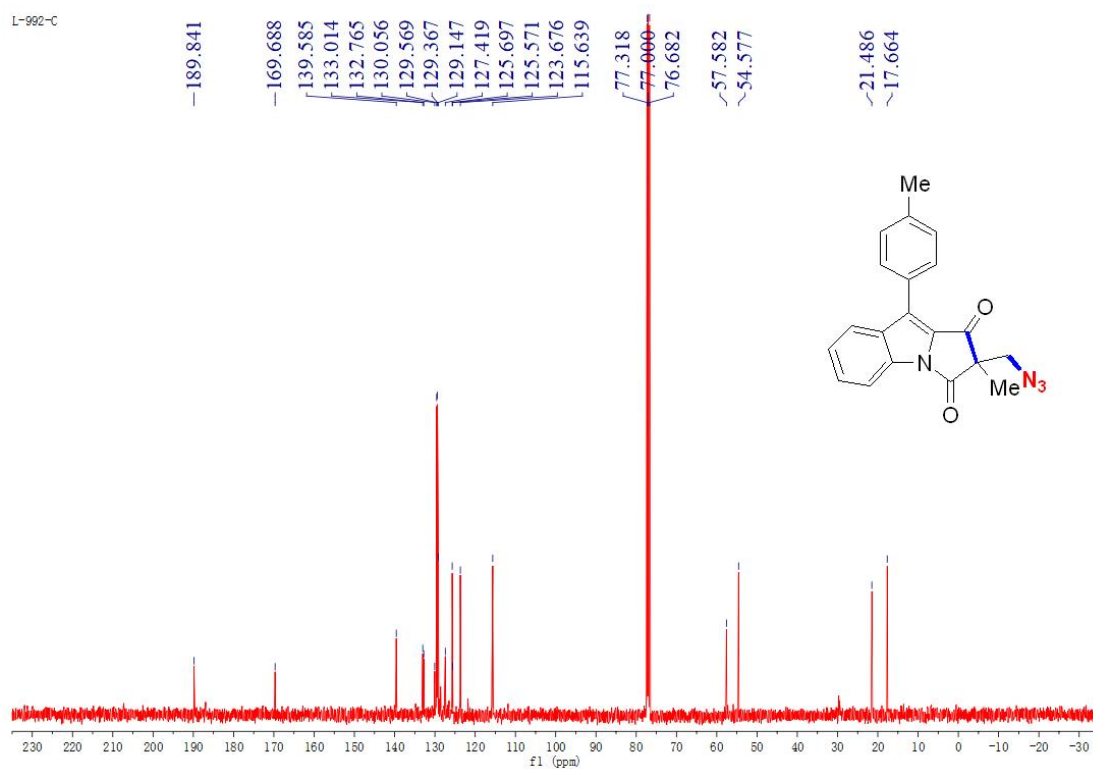

## 25-<sup>1</sup>H NMR (400 MHz, CDCl<sub>3</sub>)

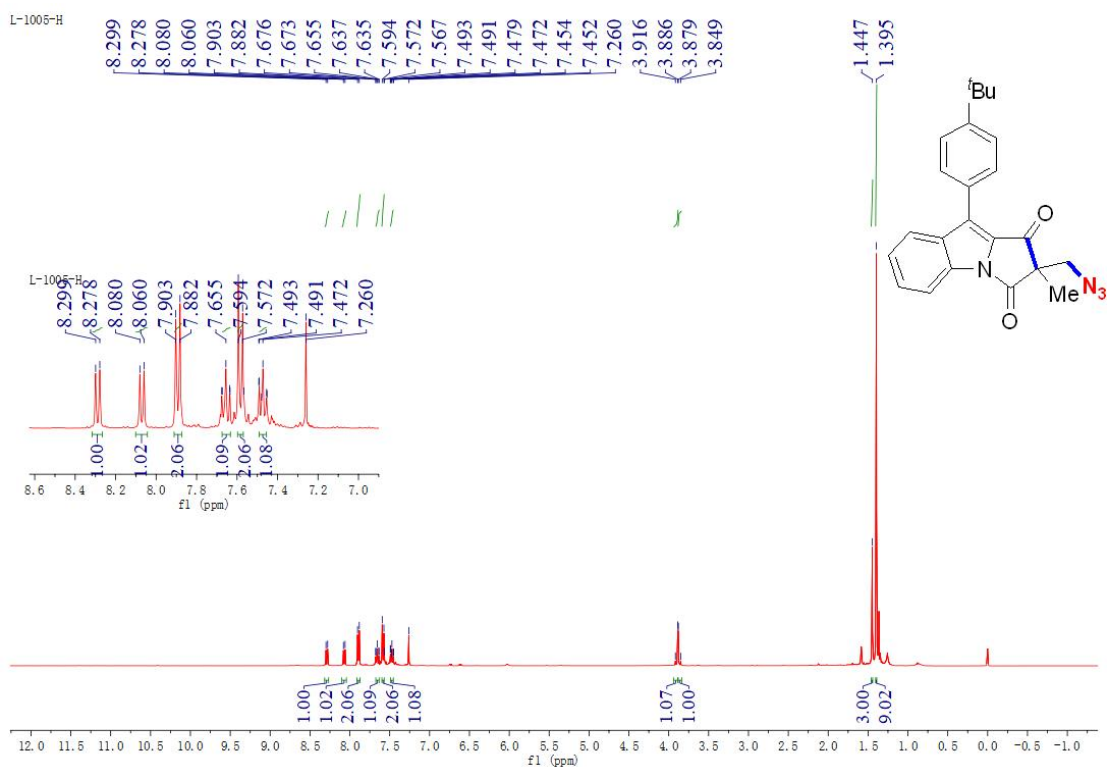

## 25-<sup>13</sup>C NMR (100 MHz, CDCl<sub>3</sub>)

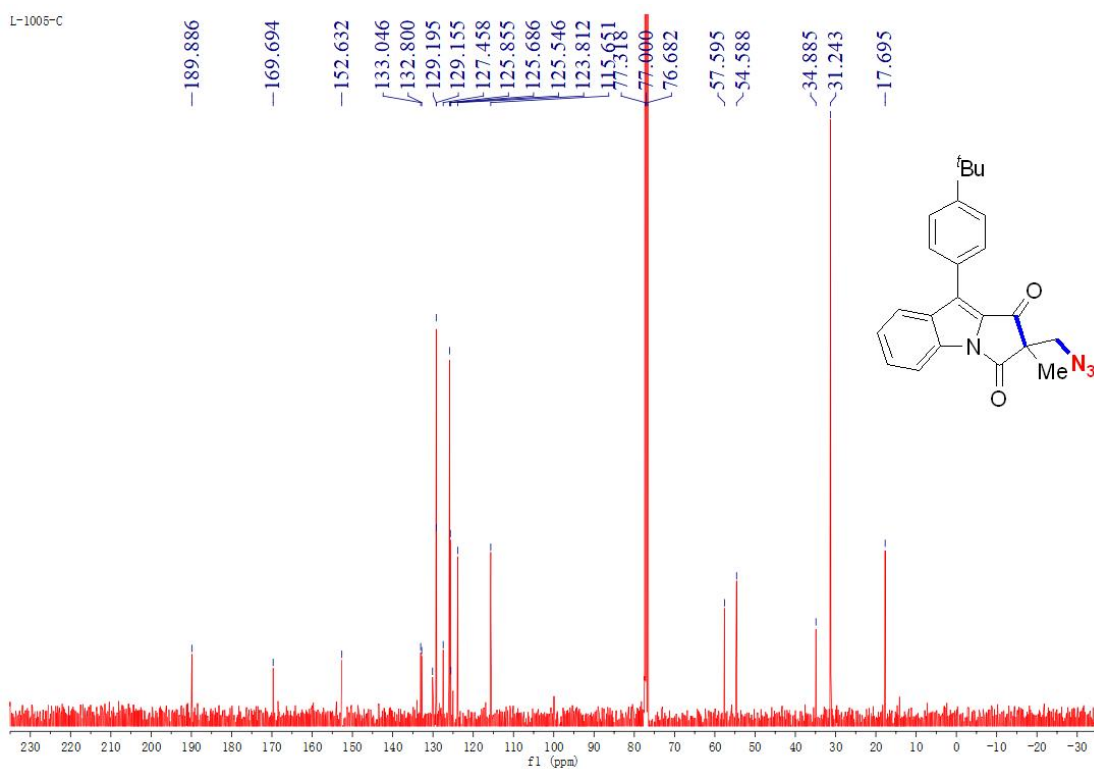



### 26-<sup>1</sup>H NMR (400 MHz, CDCl<sub>3</sub>)

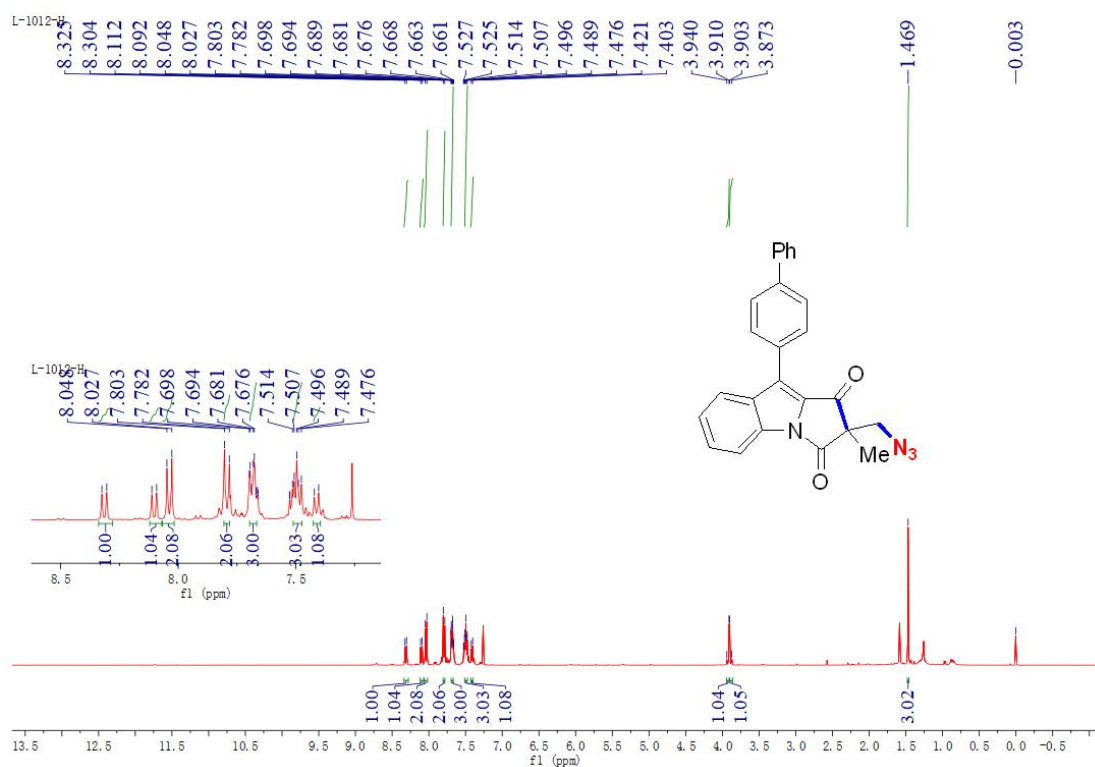

### 26-<sup>13</sup>C NMR (100 MHz, CDCl<sub>3</sub>)

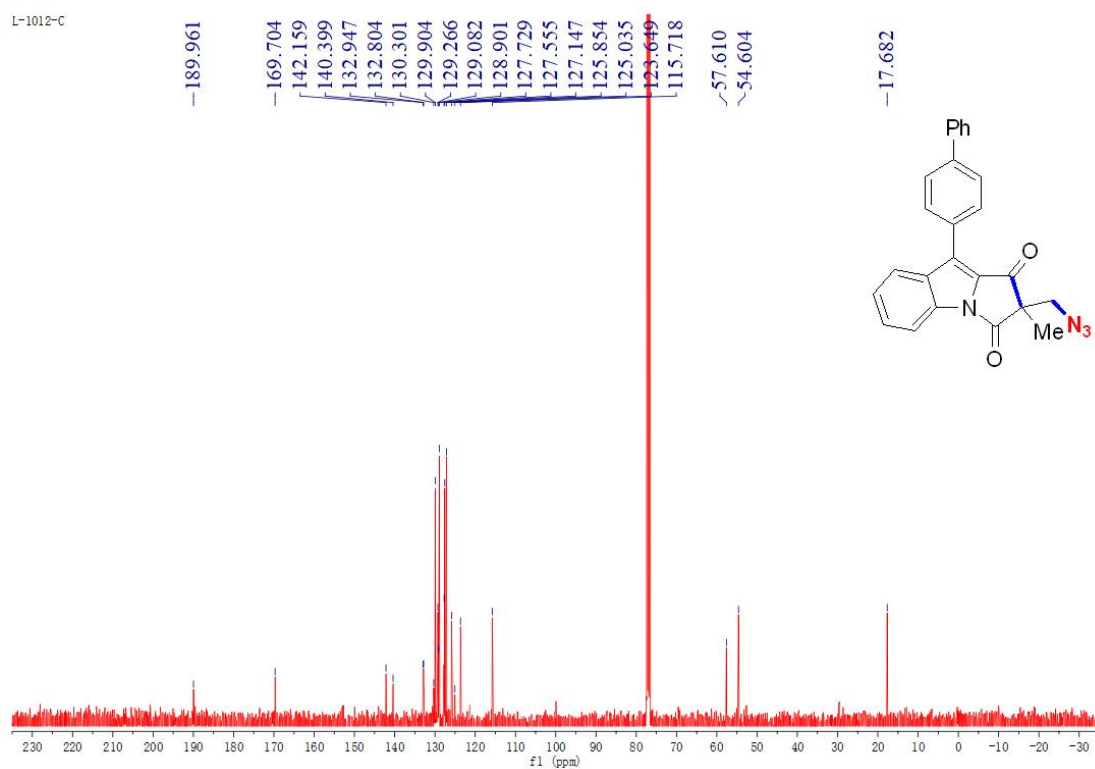

27-<sup>1</sup>H NMR (400 MHz, CDCl<sub>3</sub>)

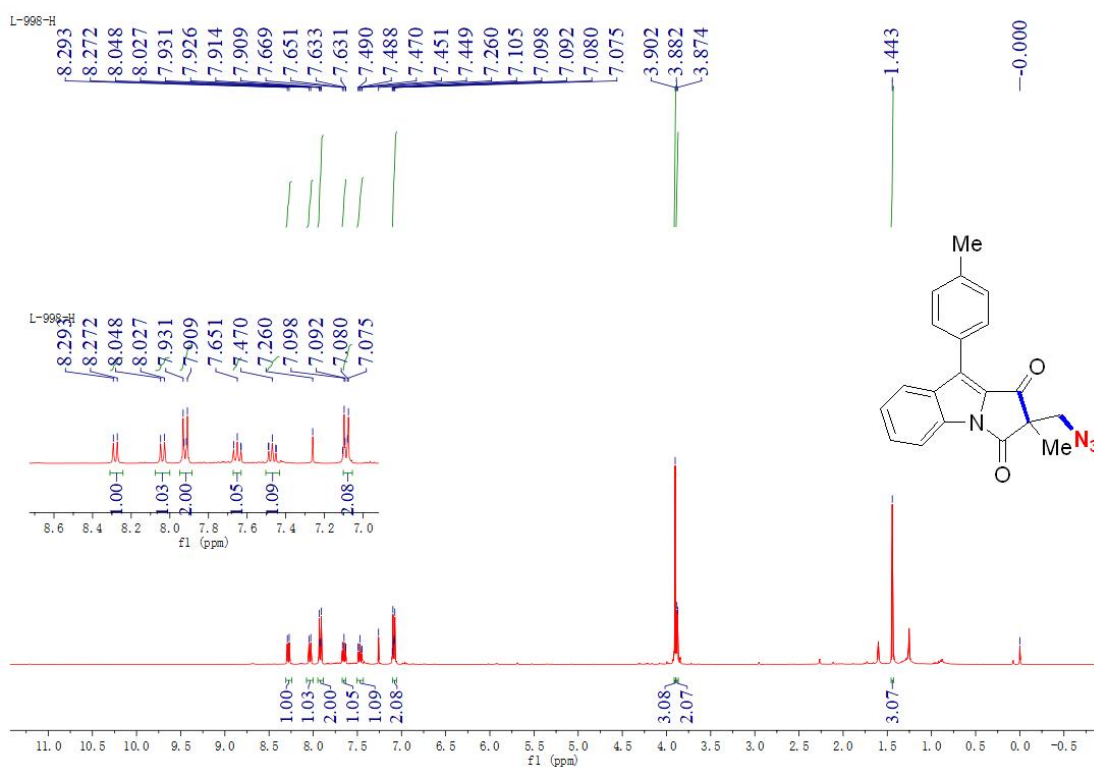

27-<sup>13</sup>C NMR (100 MHz, CDCl<sub>3</sub>)

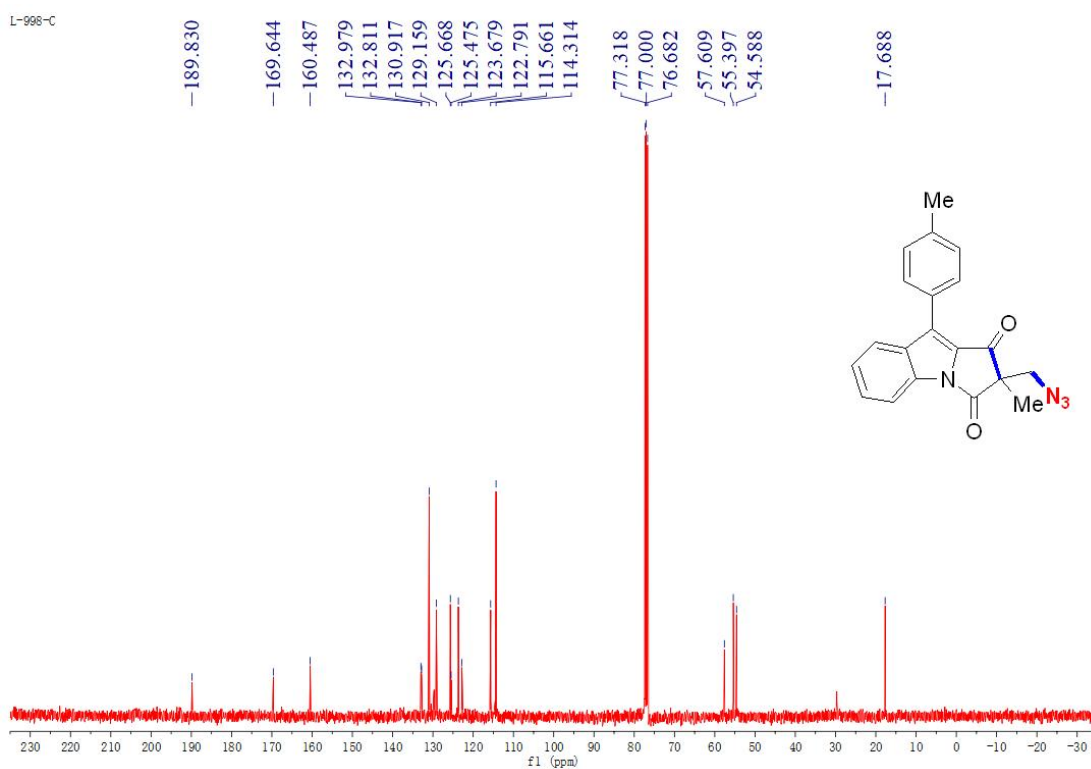

**28-<sup>1</sup>H NMR (400 MHz, CDCl<sub>3</sub>)**

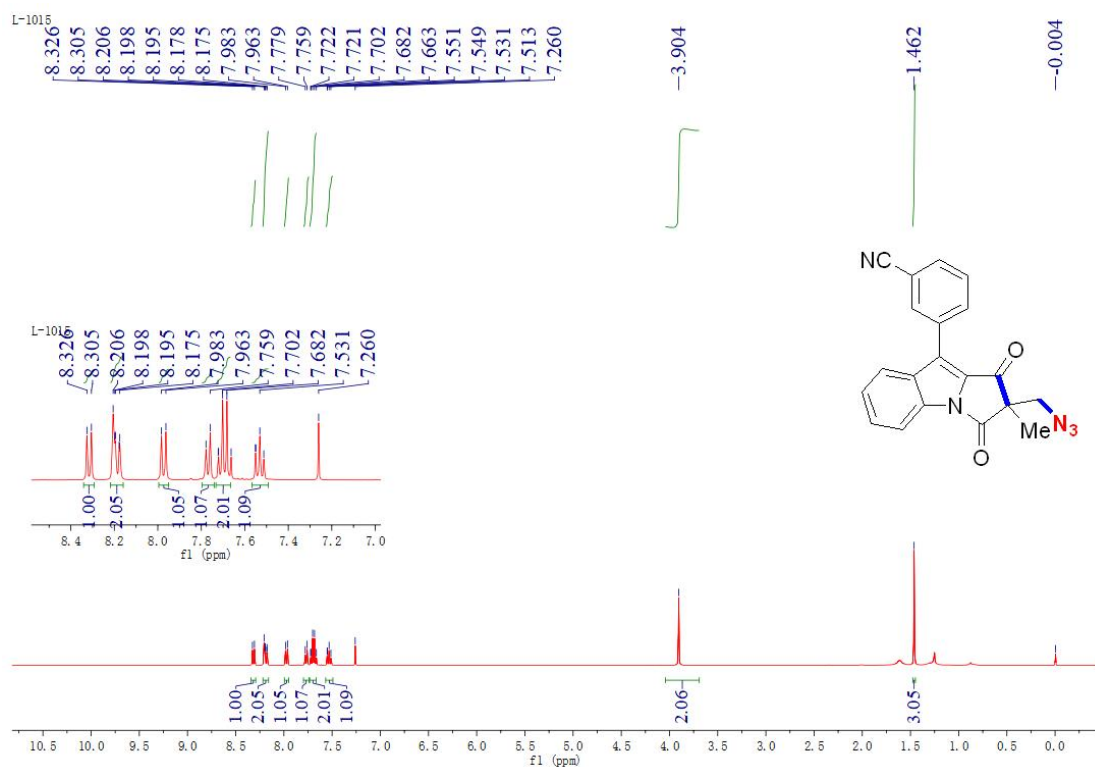

**28-<sup>13</sup>C NMR (100 MHz, CDCl<sub>3</sub>)**

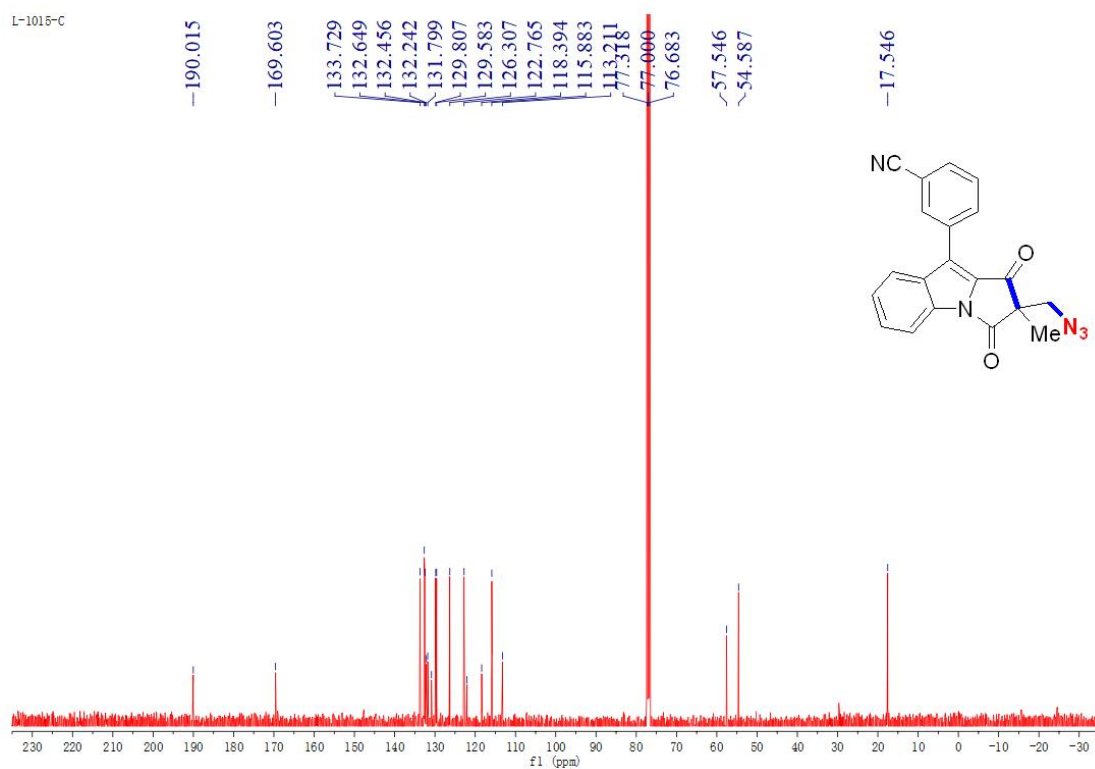

### 29-<sup>1</sup>H NMR (400 MHz, CDCl<sub>3</sub>)

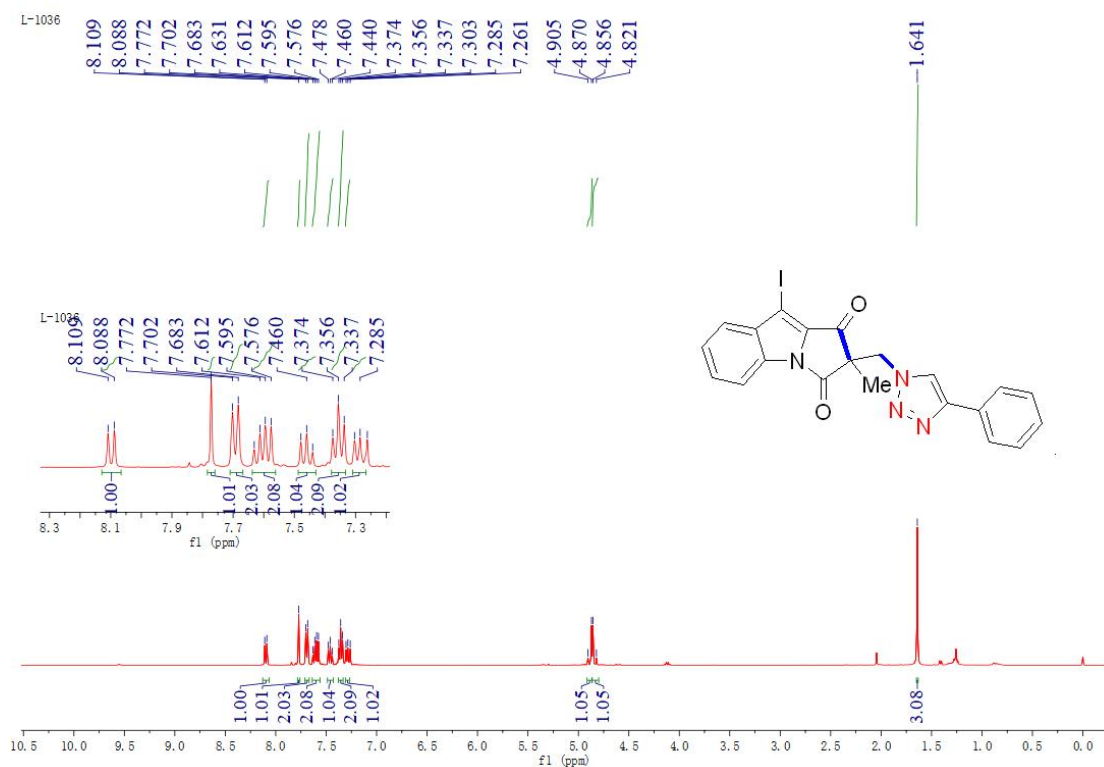

### 29-<sup>13</sup>C NMR (100 MHz, CDCl<sub>3</sub>)

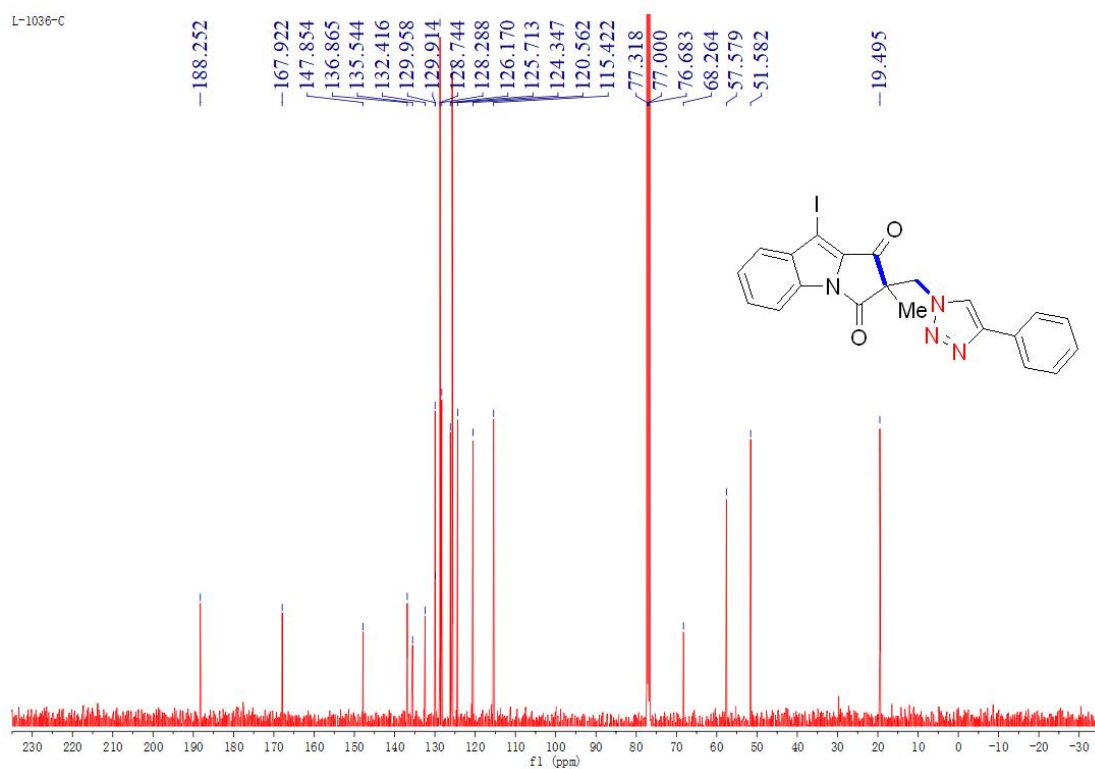

Supplement: d4ob01001a1.pdf [file d4ob01001a1.pdf]
